# Supplementary material for: De novo synthesis of polyhydroxyl aminocyclohexanes
Source: Royal Society of Chemistry journal article supplement (doi:10.1039/c004730a), 2010-01-01
Supplement: c004730a.pdf [file c004730a.pdf]

*Electronic Supporting Information*

**Denovo synthesis of polyhydroxy aminocyclohexanes**

Anobick Sar, Sergey Lindeman, and William A. Donaldson\*

|                                                                                         |     |
|-----------------------------------------------------------------------------------------|-----|
| <sup>1</sup> H NMR spectrum of (±)- <b>7</b> (CDCl <sub>3</sub> )                       | S3  |
| <sup>13</sup> C NMR spectrum of (±)- <b>7</b> (CDCl <sub>3</sub> )                      | S4  |
| <sup>1</sup> H NMR spectrum of (±)- <b>8</b> (CDCl <sub>3</sub> )                       | S5  |
| <sup>13</sup> C NMR spectrum of (±)- <b>8</b> (CDCl <sub>3</sub> )                      | S6  |
| <sup>1</sup> H NMR spectrum of (±)- <b>9</b> (CDCl <sub>3</sub> )                       | S7  |
| <sup>13</sup> C NMR spectrum of (±)- <b>9</b> (CDCl <sub>3</sub> )                      | S8  |
| <sup>1</sup> H NMR spectrum of (±)- <b>10</b> (CDCl <sub>3</sub> )                      | S9  |
| <sup>13</sup> C NMR spectrum of (±)- <b>10</b> (CDCl <sub>3</sub> )                     | S10 |
| <sup>1</sup> H NMR spectrum of (±)- <b>11</b> /(±)- <b>12</b> (CD <sub>3</sub> OD)      | S11 |
| <sup>1</sup> H NMR spectrum of (±)- <b>13</b> (CDCl <sub>3</sub> )                      | S12 |
| <sup>13</sup> C NMR spectrum of (±)- <b>13</b> (CDCl <sub>3</sub> )                     | S13 |
| <sup>1</sup> H NMR spectrum of (±)- <b>14</b> (CDCl <sub>3</sub> )                      | S14 |
| <sup>13</sup> C NMR spectrum of (±)- <b>14</b> (CD <sub>3</sub> OD)                     | S15 |
| <sup>1</sup> H NMR spectrum of (±)- <b>15</b> (CDCl <sub>3</sub> )                      | S16 |
| <sup>13</sup> C NMR spectrum of (±)- <b>15</b> (CD <sub>3</sub> OD)                     | S17 |
| <sup>1</sup> H NMR spectrum of (±)- <b>16</b> (CD <sub>3</sub> OD)                      | S18 |
| <sup>13</sup> C NMR spectrum of (±)- <b>16</b> (d <sub>6</sub> -acetone)                | S19 |
| <sup>1</sup> H NMR spectrum of (±)- <b>17</b> (CD <sub>3</sub> OD)                      | S20 |
| <sup>13</sup> C NMR spectrum of (±)- <b>17</b> (CD <sub>3</sub> OD)                     | S21 |
| <sup>1</sup> H NMR spectrum of (±)- <b>18</b> (CDCl <sub>3</sub> )                      | S22 |
| <sup>13</sup> C NMR spectrum of (±)- <b>18</b> (CDCl <sub>3</sub> )                     | S23 |
| <sup>1</sup> H NMR spectrum of (±)- <b>19</b> (CD <sub>3</sub> OD)                      | S24 |
| <sup>13</sup> C NMR spectrum of (±)- <b>19</b> (CD <sub>3</sub> OD)                     | S25 |
| <sup>1</sup> H NMR spectrum of (±)- <b>20</b> (CD <sub>3</sub> OD)                      | S26 |
| <sup>13</sup> C NMR spectrum of (±)- <b>20</b> (CD <sub>3</sub> OD)                     | S27 |
| <sup>1</sup> H NMR spectrum of (±)- <b>21</b> (CD <sub>3</sub> OD)                      | S28 |
| <sup>13</sup> C NMR spectrum of (±)- <b>21</b> (CD <sub>3</sub> OD)                     | S29 |
| <sup>1</sup> H NMR spectrum of (±)- <b>22</b> (CD <sub>3</sub> OD)                      | S30 |
| <sup>13</sup> C NMR spectrum of (±)- <b>22</b> (d <sub>6</sub> -DMSO)                   | S31 |
| <sup>1</sup> H NMR spectrum of (±)- <b>23</b> (CD <sub>3</sub> OD)                      | S32 |
| <sup>13</sup> C NMR spectrum of (±)- <b>23</b> (CD <sub>3</sub> OD)                     | S33 |
| <sup>1</sup> H NMR spectrum of (±)- <b>24</b> (CD <sub>3</sub> OD)                      | S34 |
| <sup>13</sup> C NMR spectrum of (±)- <b>24</b> (CD <sub>3</sub> OD)                     | S35 |
| <sup>1</sup> H NMR spectrum of (±)- <b>25a</b> and (±)- <b>25b</b> (CDCl <sub>3</sub> ) | S36 |
| <sup>1</sup> H NMR spectrum of (±)- <b>26</b> (d <sub>6</sub> -DMSO)                    | S37 |
| <sup>13</sup> C NMR spectrum of (±)- <b>26</b> (d <sub>6</sub> -DMSO)                   | S38 |
| <sup>1</sup> H NMR spectrum of (±)- <b>27</b> (CDCl <sub>3</sub> )                      | S39 |
| <sup>13</sup> C NMR spectrum of (±)- <b>27</b> (CDCl <sub>3</sub> )                     | S40 |
| <sup>1</sup> H NMR spectrum of (±)- <b>29</b> (CDCl <sub>3</sub> )                      | S41 |

|                                                                     |     |
|---------------------------------------------------------------------|-----|
| <sup>13</sup> C NMR spectrum of (±)- <b>29</b> (CDCl <sub>3</sub> ) | S42 |
| <sup>1</sup> H NMR spectrum of (±)- <b>30</b> (CDCl <sub>3</sub> )  | S43 |
| <sup>13</sup> C NMR spectrum of (±)- <b>30</b> (CDCl <sub>3</sub> ) | S44 |
| <sup>1</sup> H NMR spectrum of (±)- <b>33</b>                       | S45 |
| <sup>13</sup> C NMR spectrum of (±)- <b>33</b>                      | S46 |
| <sup>1</sup> H NMR spectrum of (±)- <b>34</b>                       | S47 |
| <sup>13</sup> C NMR spectrum of (±)- <b>34</b>                      | S48 |
| <sup>1</sup> H NMR spectrum of (±)- <b>35</b> (CDCl <sub>3</sub> )  | S49 |
| <sup>13</sup> C NMR spectrum of (±)- <b>35</b> (CDCl <sub>3</sub> ) | S50 |
| <sup>1</sup> H NMR spectrum of (±)- <b>36</b> (CDCl <sub>3</sub> )  | S51 |
| <sup>13</sup> C NMR spectrum of (±)- <b>36</b> (CDCl <sub>3</sub> ) | S52 |
| <sup>1</sup> H NMR spectrum of (±)- <b>37</b> (CDCl <sub>3</sub> )  | S53 |
| <sup>13</sup> C NMR spectrum of (±)- <b>37</b> (CDCl <sub>3</sub> ) | S54 |
| <sup>1</sup> H NMR spectrum of (±)- <b>38</b> (CDCl <sub>3</sub> )  | S55 |
| <sup>13</sup> C NMR spectrum of (±)- <b>38</b> (CDCl <sub>3</sub> ) | S56 |
| ORTEP of major endoperoxide (±)- <b>9</b>                           | S57 |
| ORTEP of major endoperoxide (±)- <b>10</b>                          | S57 |
| ORTEP of diacetate (±)- <b>18</b>                                   | S58 |
| ORTEP of epoxy diol (±)- <b>33</b>                                  | S58 |
| ORTEP of epoxy diol (±)- <b>34</b>                                  | S59 |
| ORTEP of epoxy diol (±)- <b>35</b>                                  | S59 |

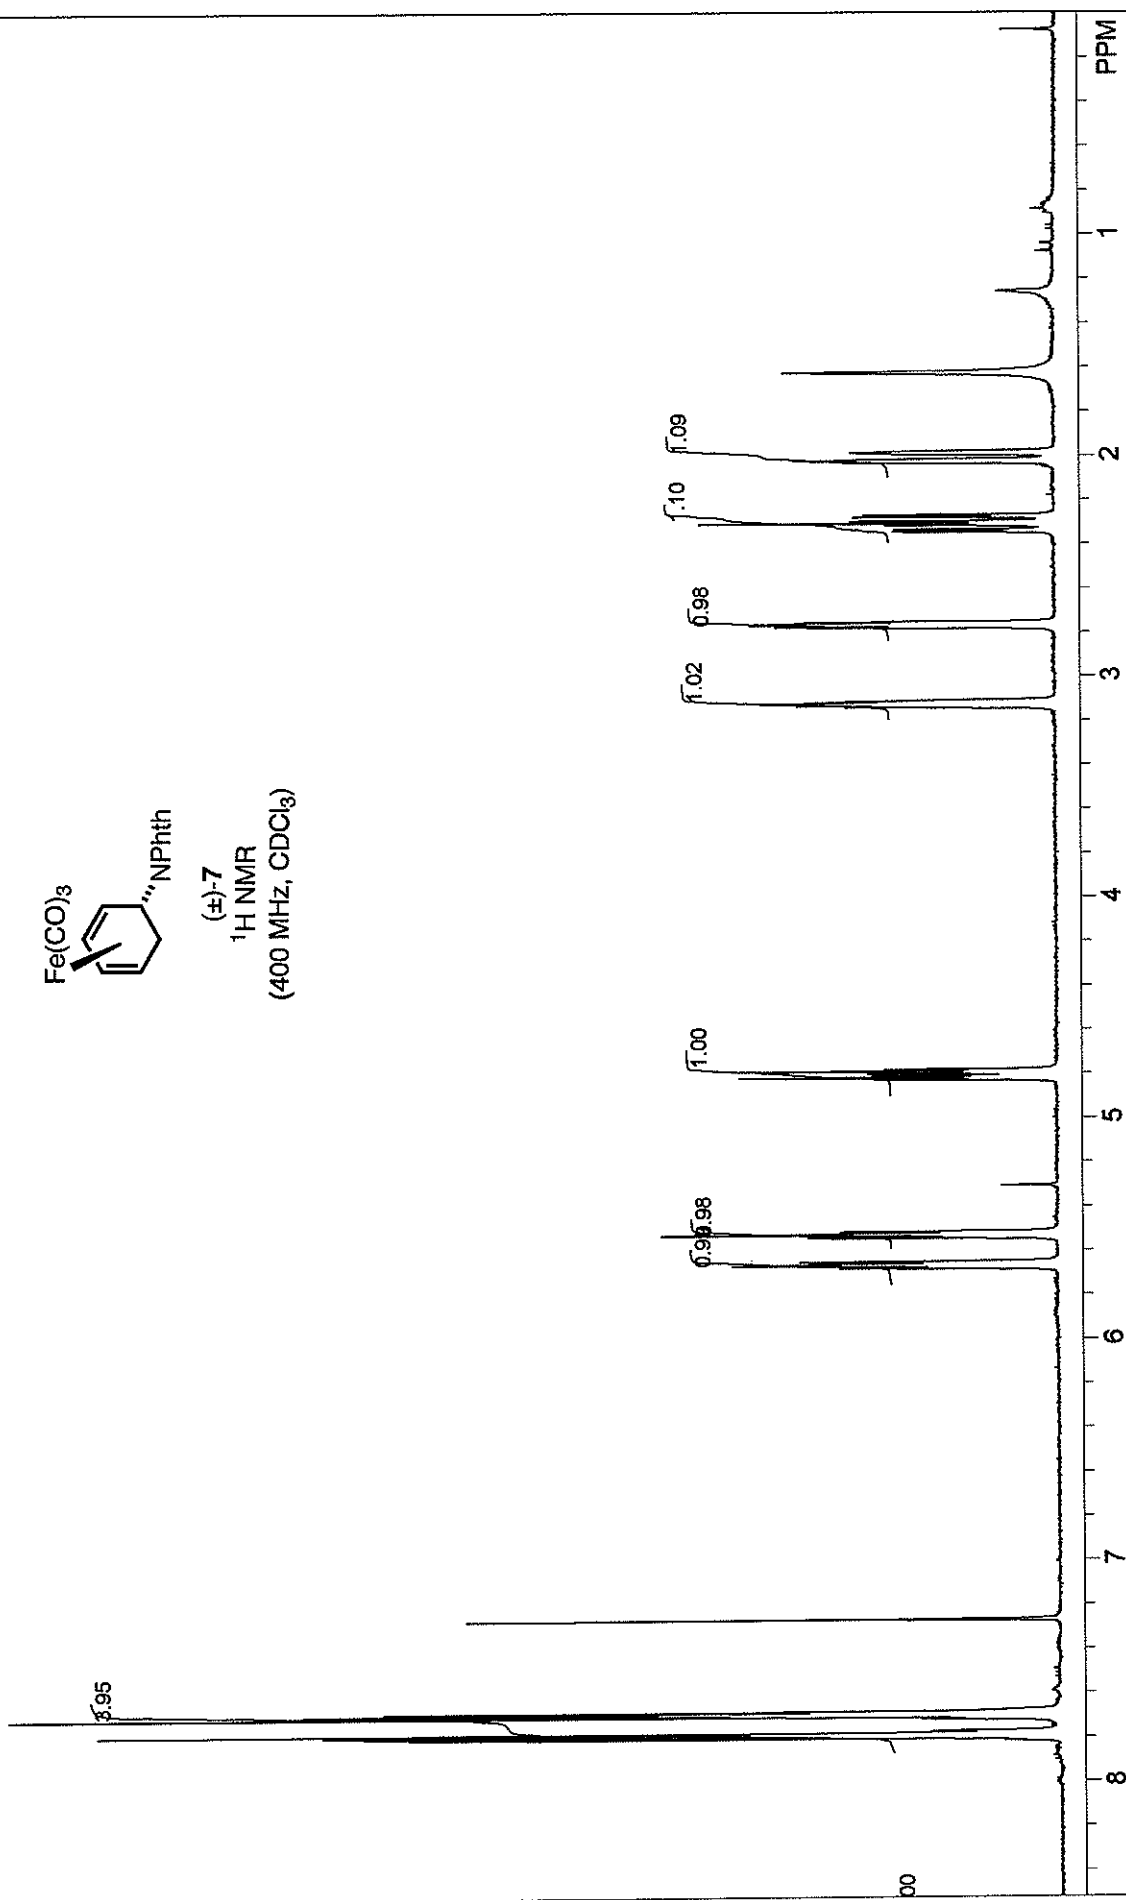

STANDARD 1H OBSERVE - profile

|             |             |             |             |              |                           |
|-------------|-------------|-------------|-------------|--------------|---------------------------|
| F1: 399.751 | F2: 100.526 | SW1: 6410   | OF1: 2403.0 | PTSId: 13132 | USER: -- DATE: Aug 4 2008 |
| EX: s2pul   | PW: 8.0 us  | PD: 1.0 sec | NA: 8       | LB: 0.0      | Nuts - \$ase131fd.fid     |

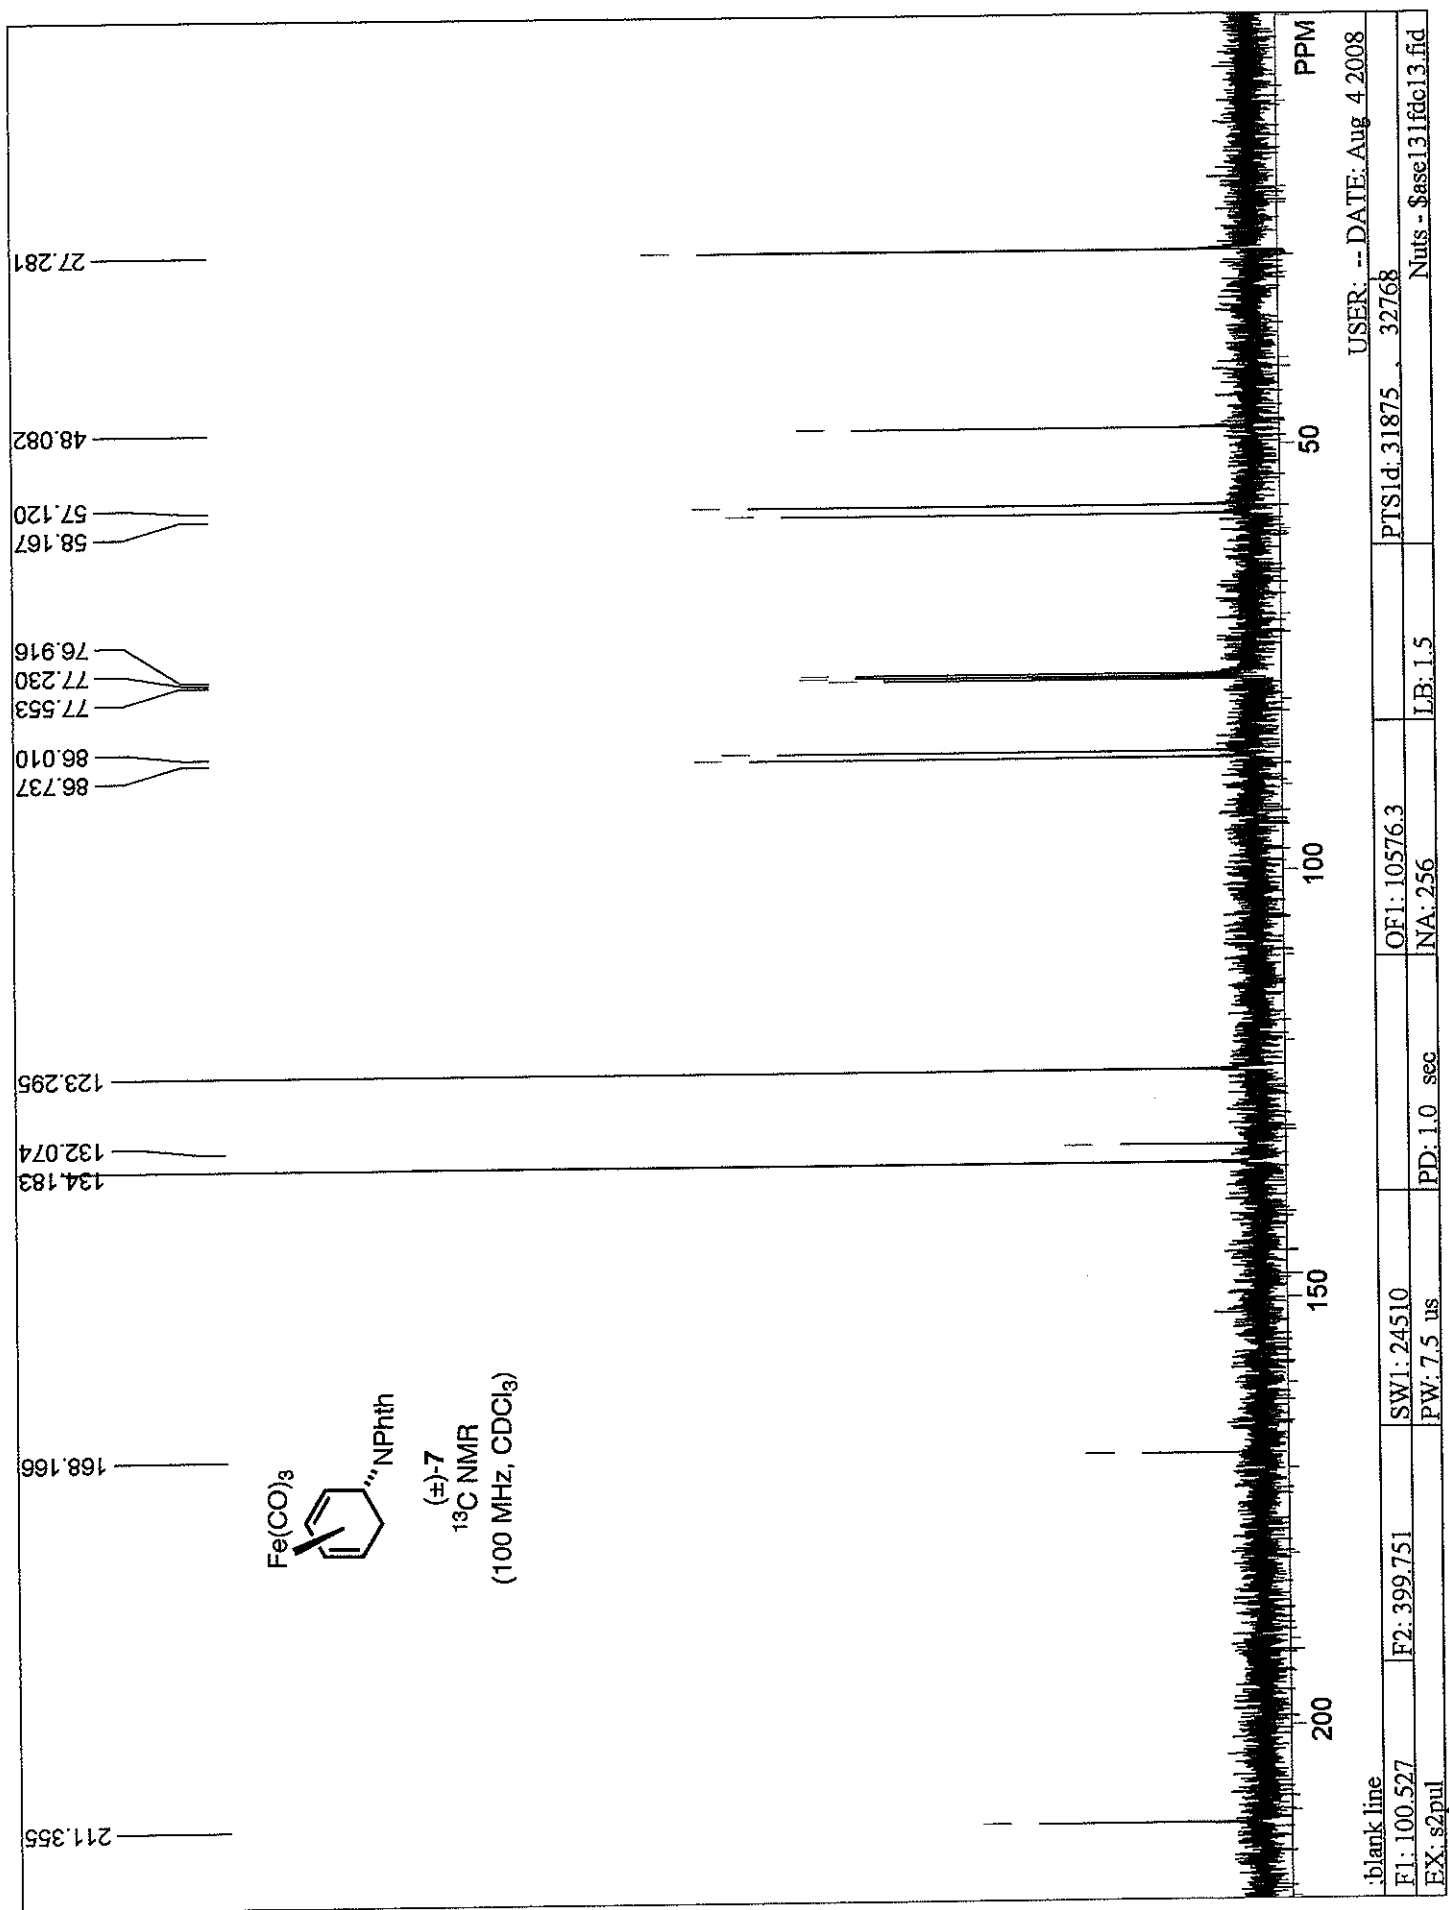

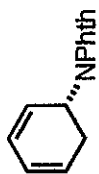

(±)-**8**  
<sup>1</sup>H NMR  
 (400 MHz, CDCl<sub>3</sub>)

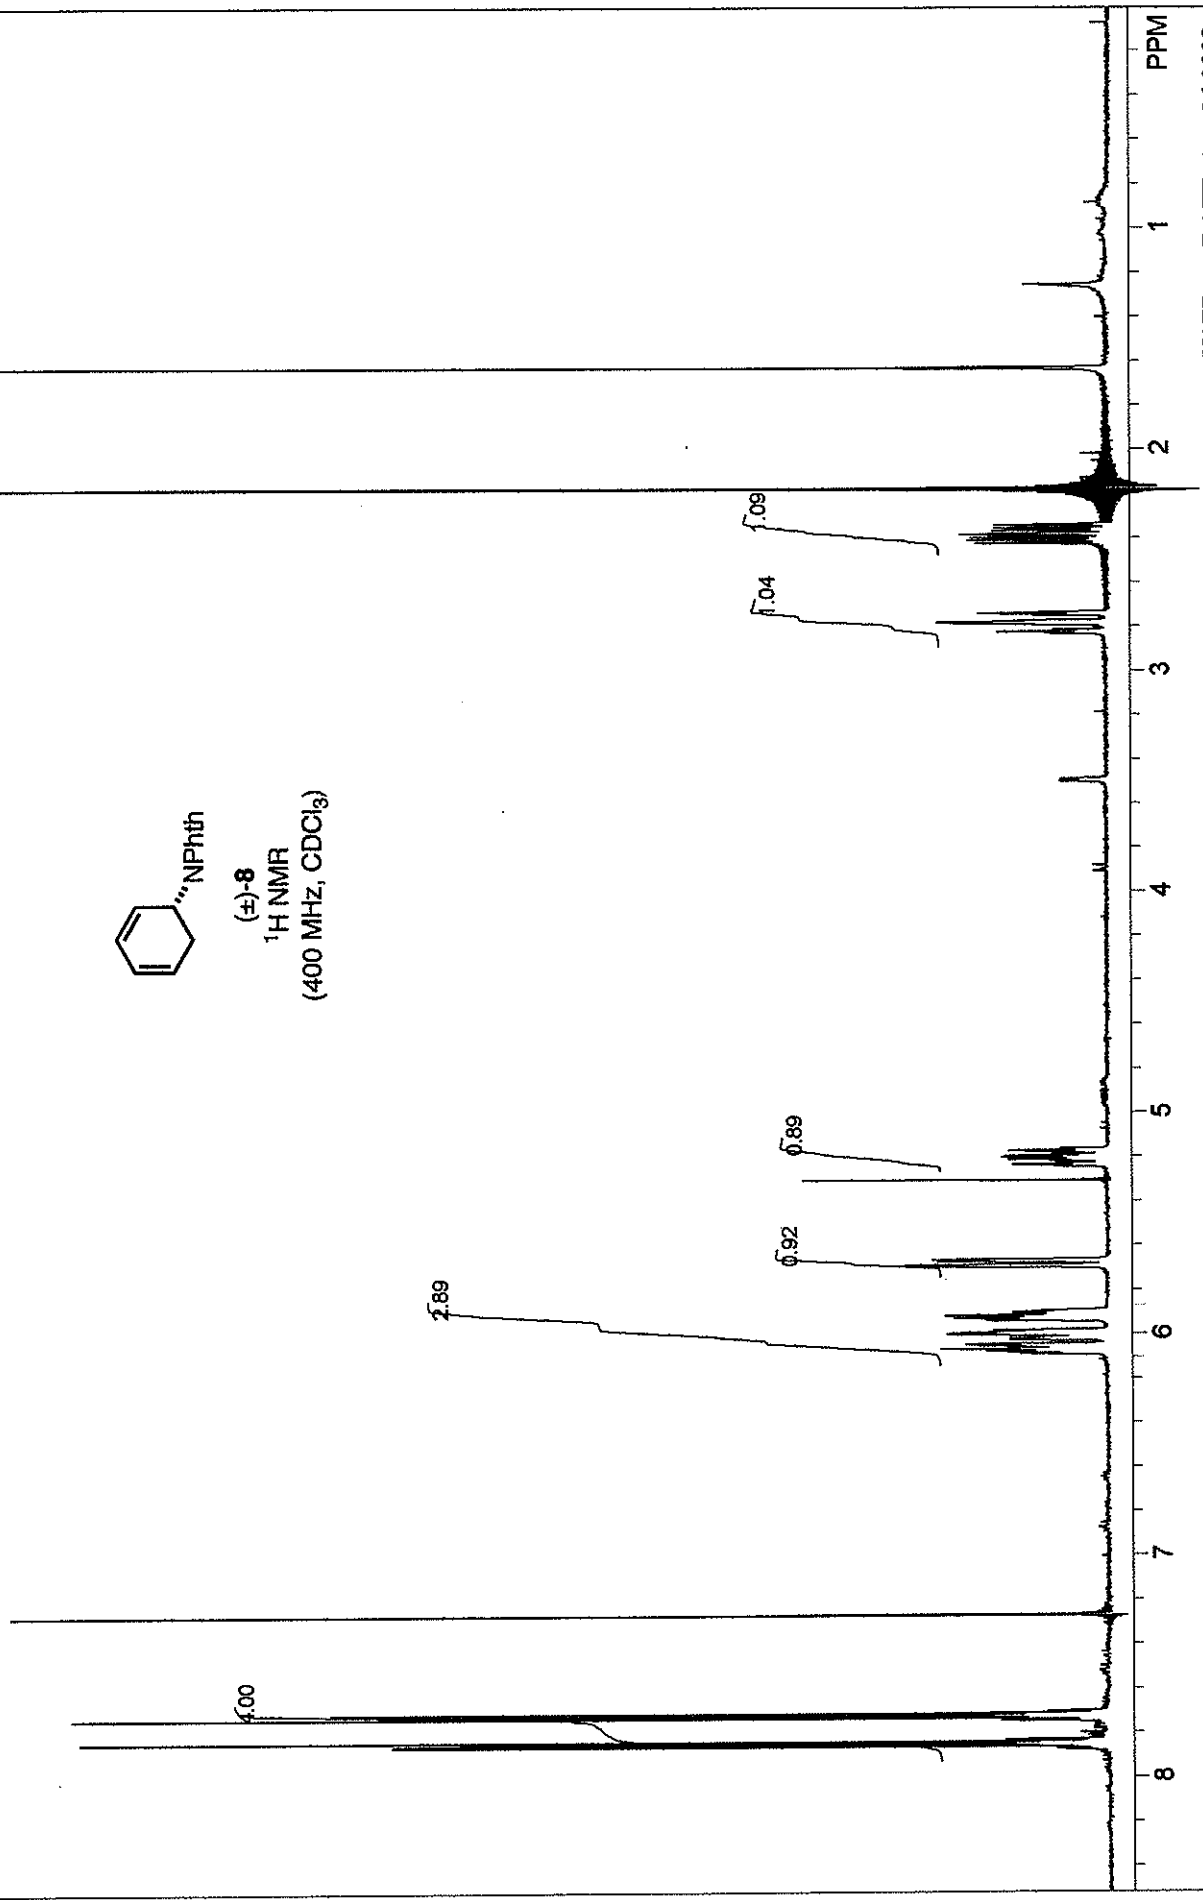

|             |             |                            |                    |
|-------------|-------------|----------------------------|--------------------|
| .blank line |             | USER: -- DATE: Aug 26 2008 |                    |
| F1: 399.751 | F2: 100.526 | OF1: 2403.5                | PTSId: 13132_16384 |
| EX: s2pul   | PW: 8.0 us  | NA: 8                      | LB: 0.0            |
|             | PD: 1.0 sec | Nuts - \$ase145f2.fid      |                    |

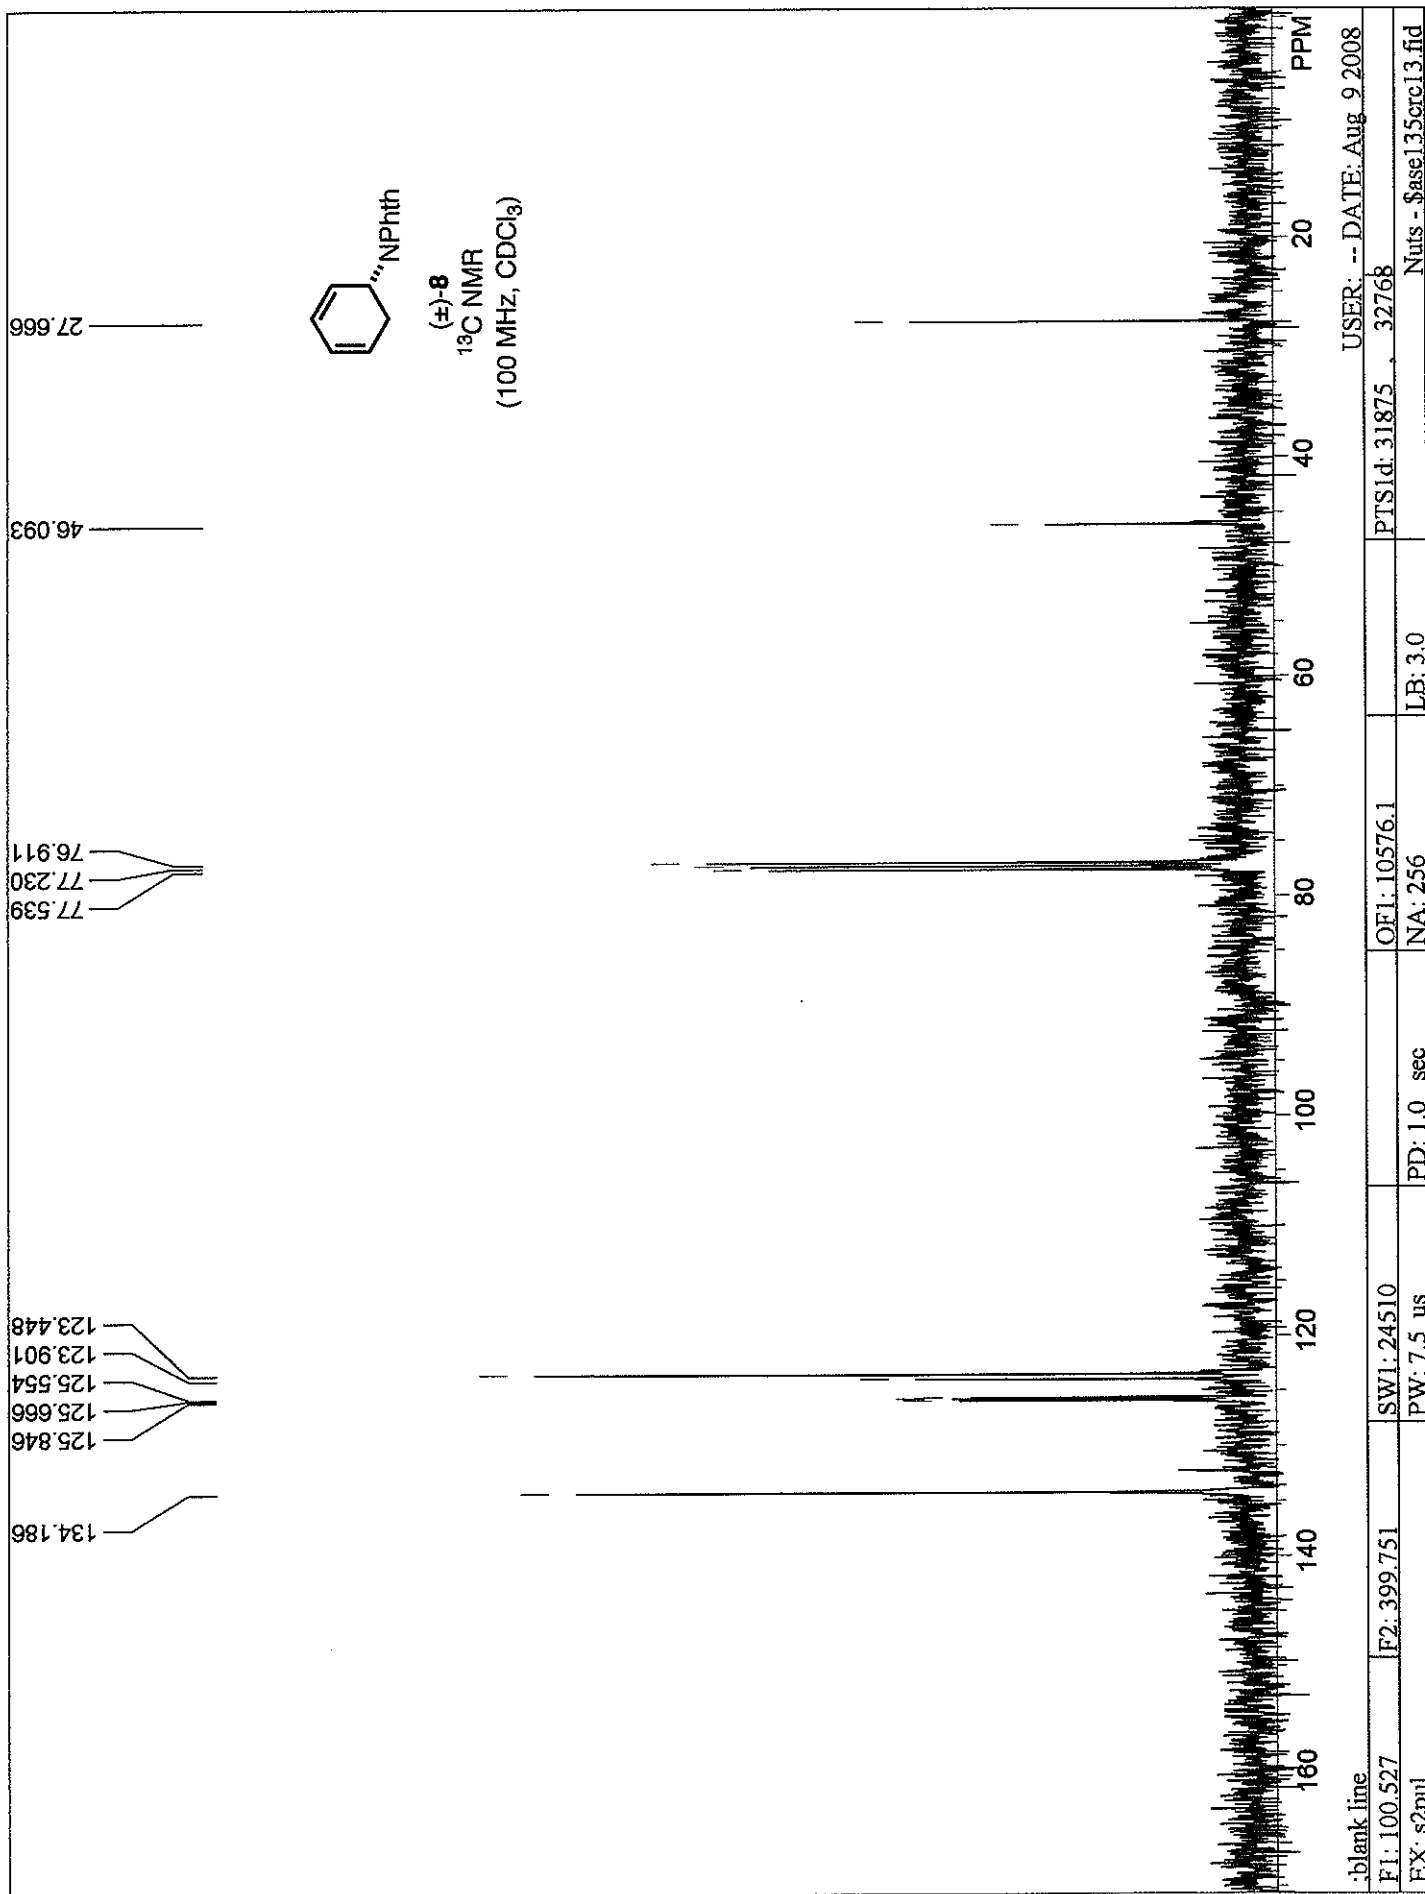

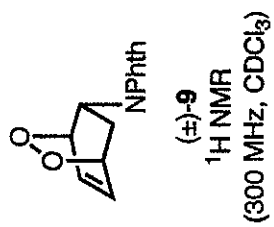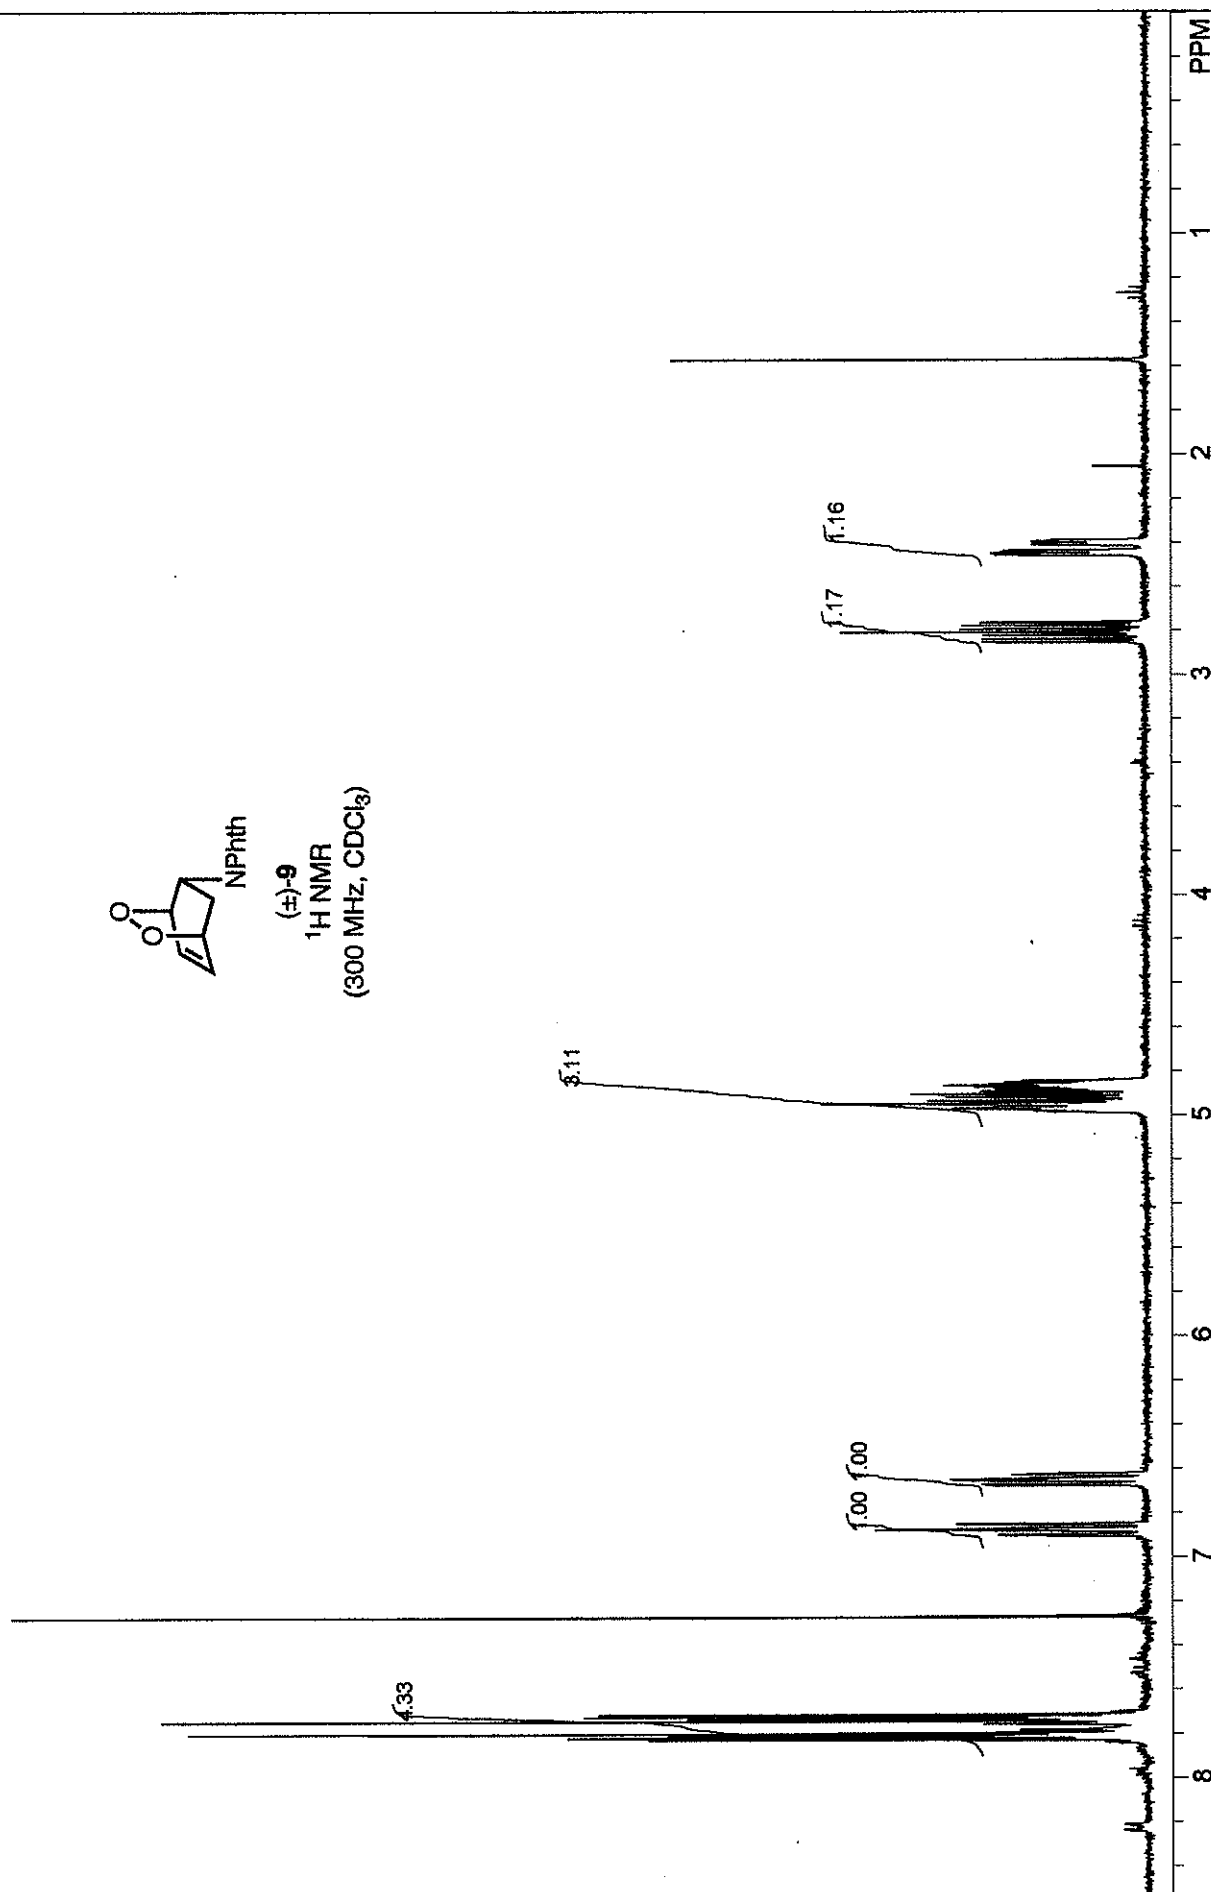

STANDARD\_1H OBSERVE:blank line

F1: 300.133

F2: 75.476

SW1: 4803

PW: 6.3 us

PD: 1.0 sec

NA: 8

OF1: 1803.7

LB: 0.0

PTS1d: 9596

16384

USER: -- DATE: Apr 29 2009

Nuts - \$ase278z1.fid

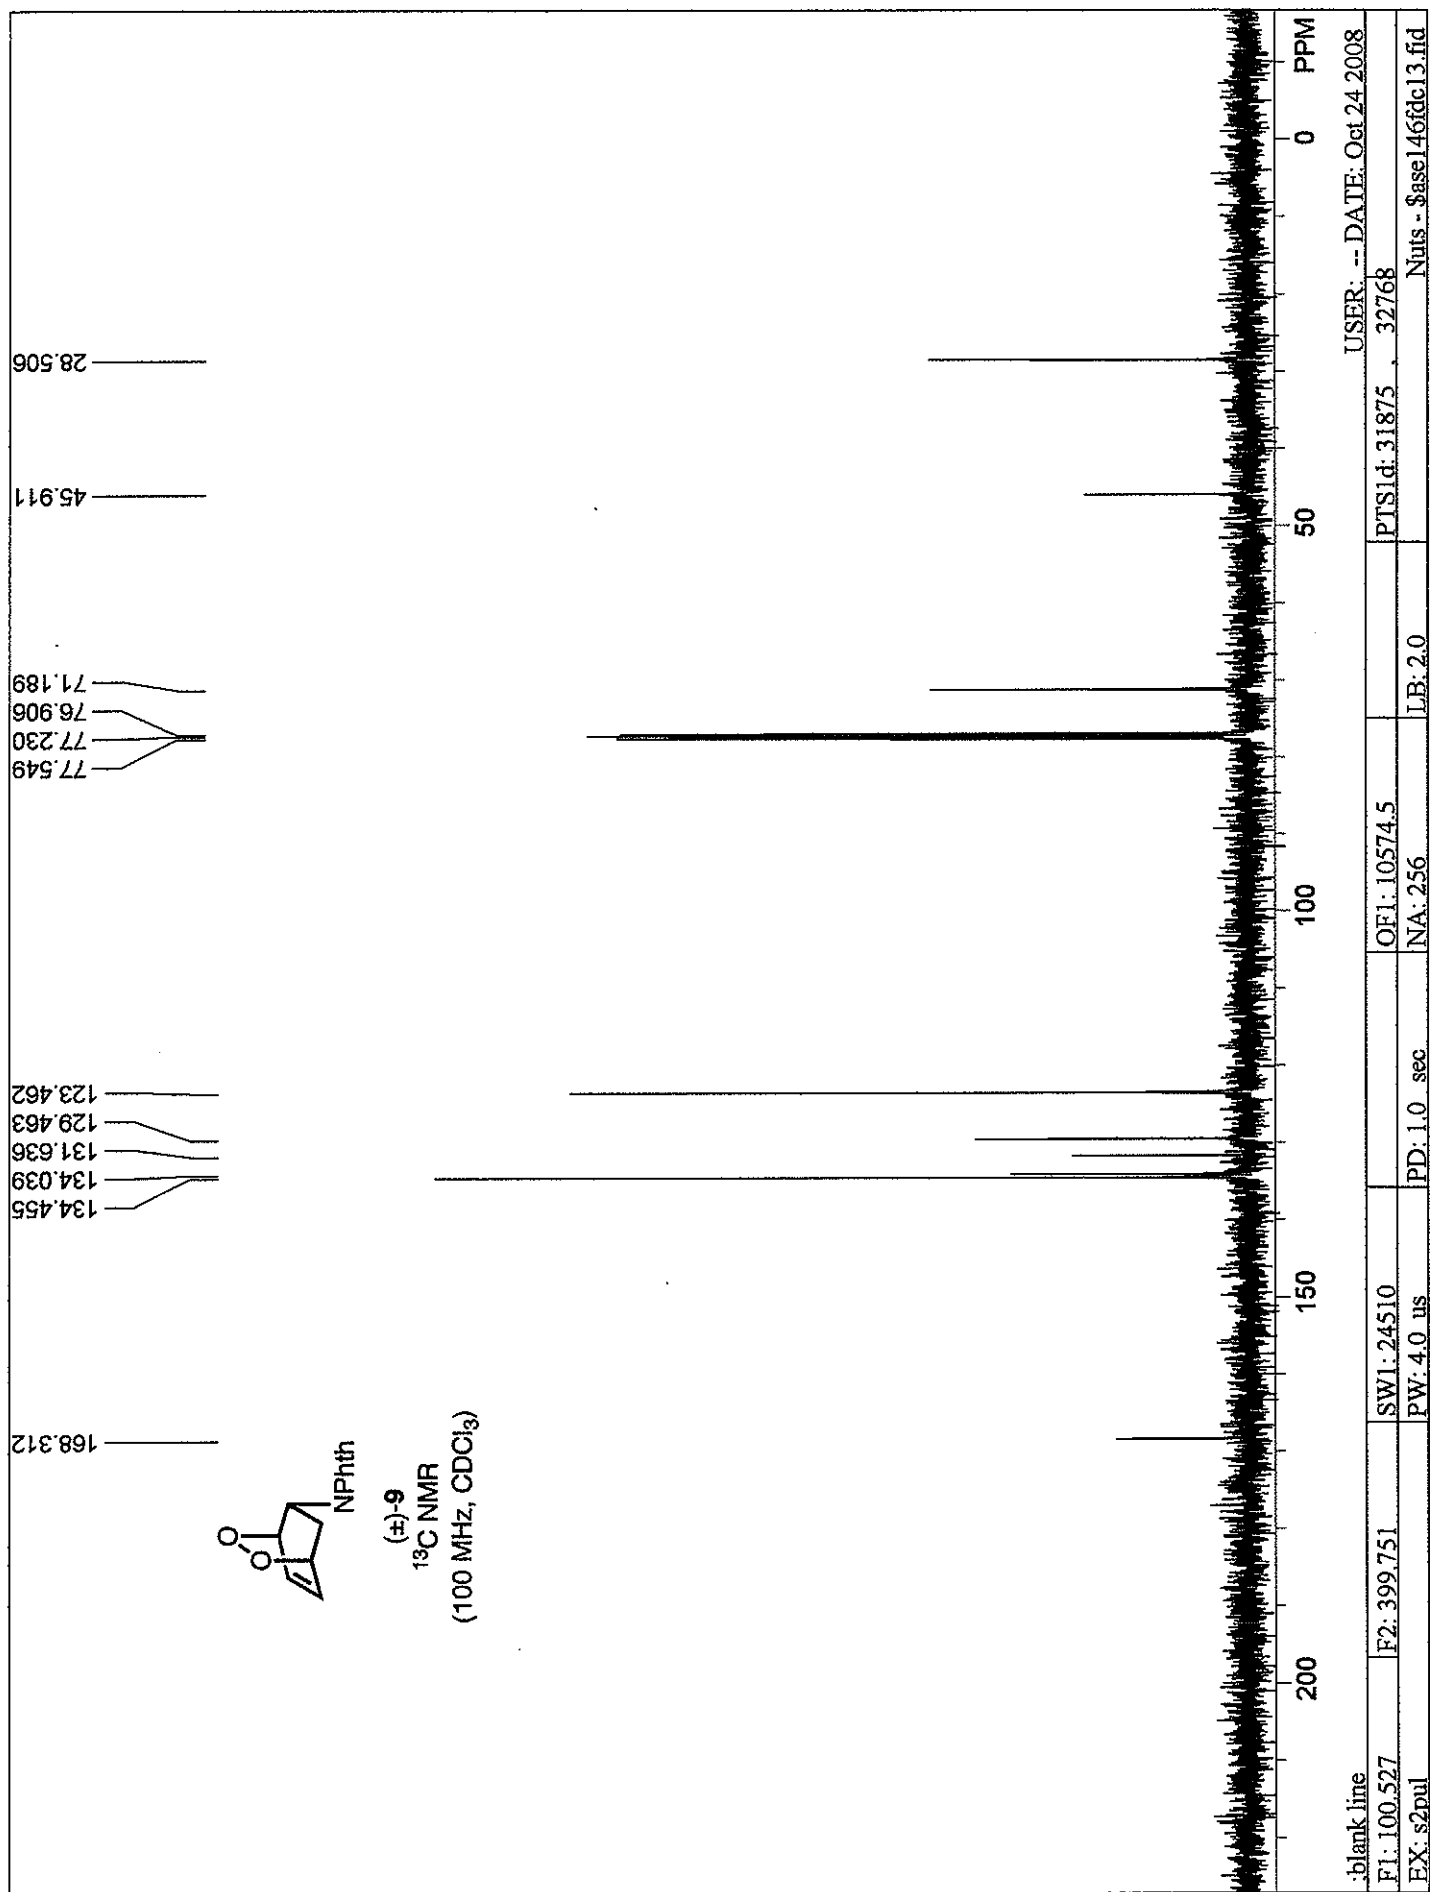



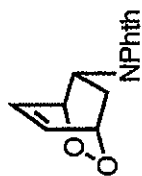

(±)-10  
<sup>1</sup>H NMR  
(300 MHz, CDCl<sub>3</sub>)

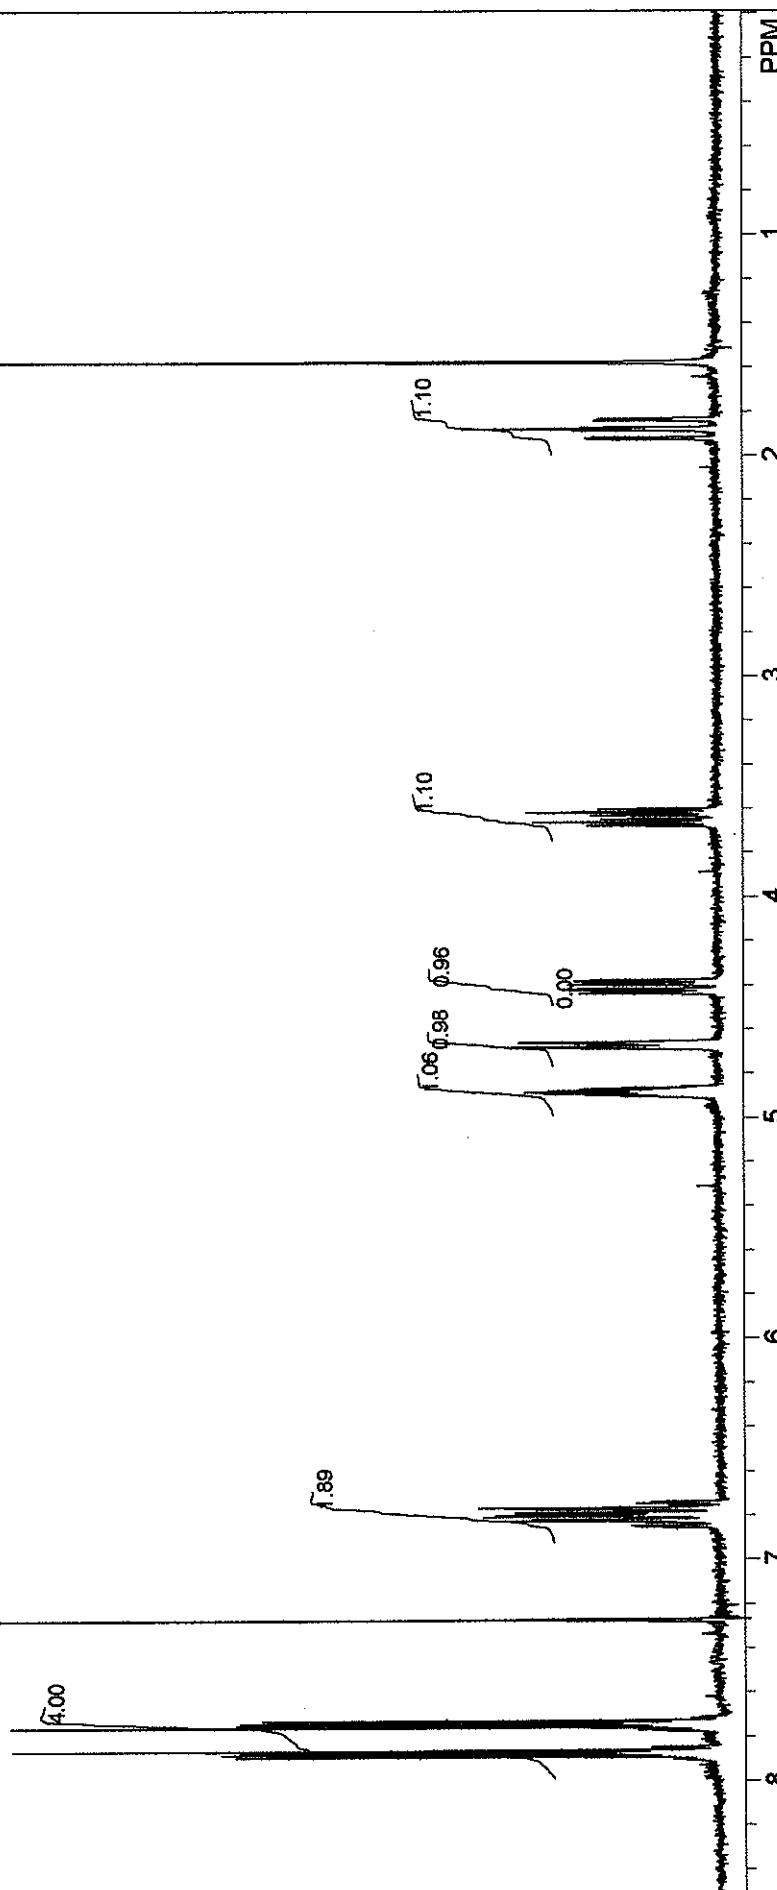

STANDARD 1H OBSERVE:blank line

|             |            |             |             |             |                            |
|-------------|------------|-------------|-------------|-------------|----------------------------|
| F1: 300.133 | F2: 75.476 | SW1: 4803   | OF1: 1803.3 | PTS1d: 9596 | USER: -- DATE: Mar 15 2009 |
| EX: s2pul   | PW: 6.3 us | PD: 1.0 sec | NA: 8       | LB: 0.0     | 16384                      |
|             |            |             |             |             | Nuts - \$as031509.fid      |

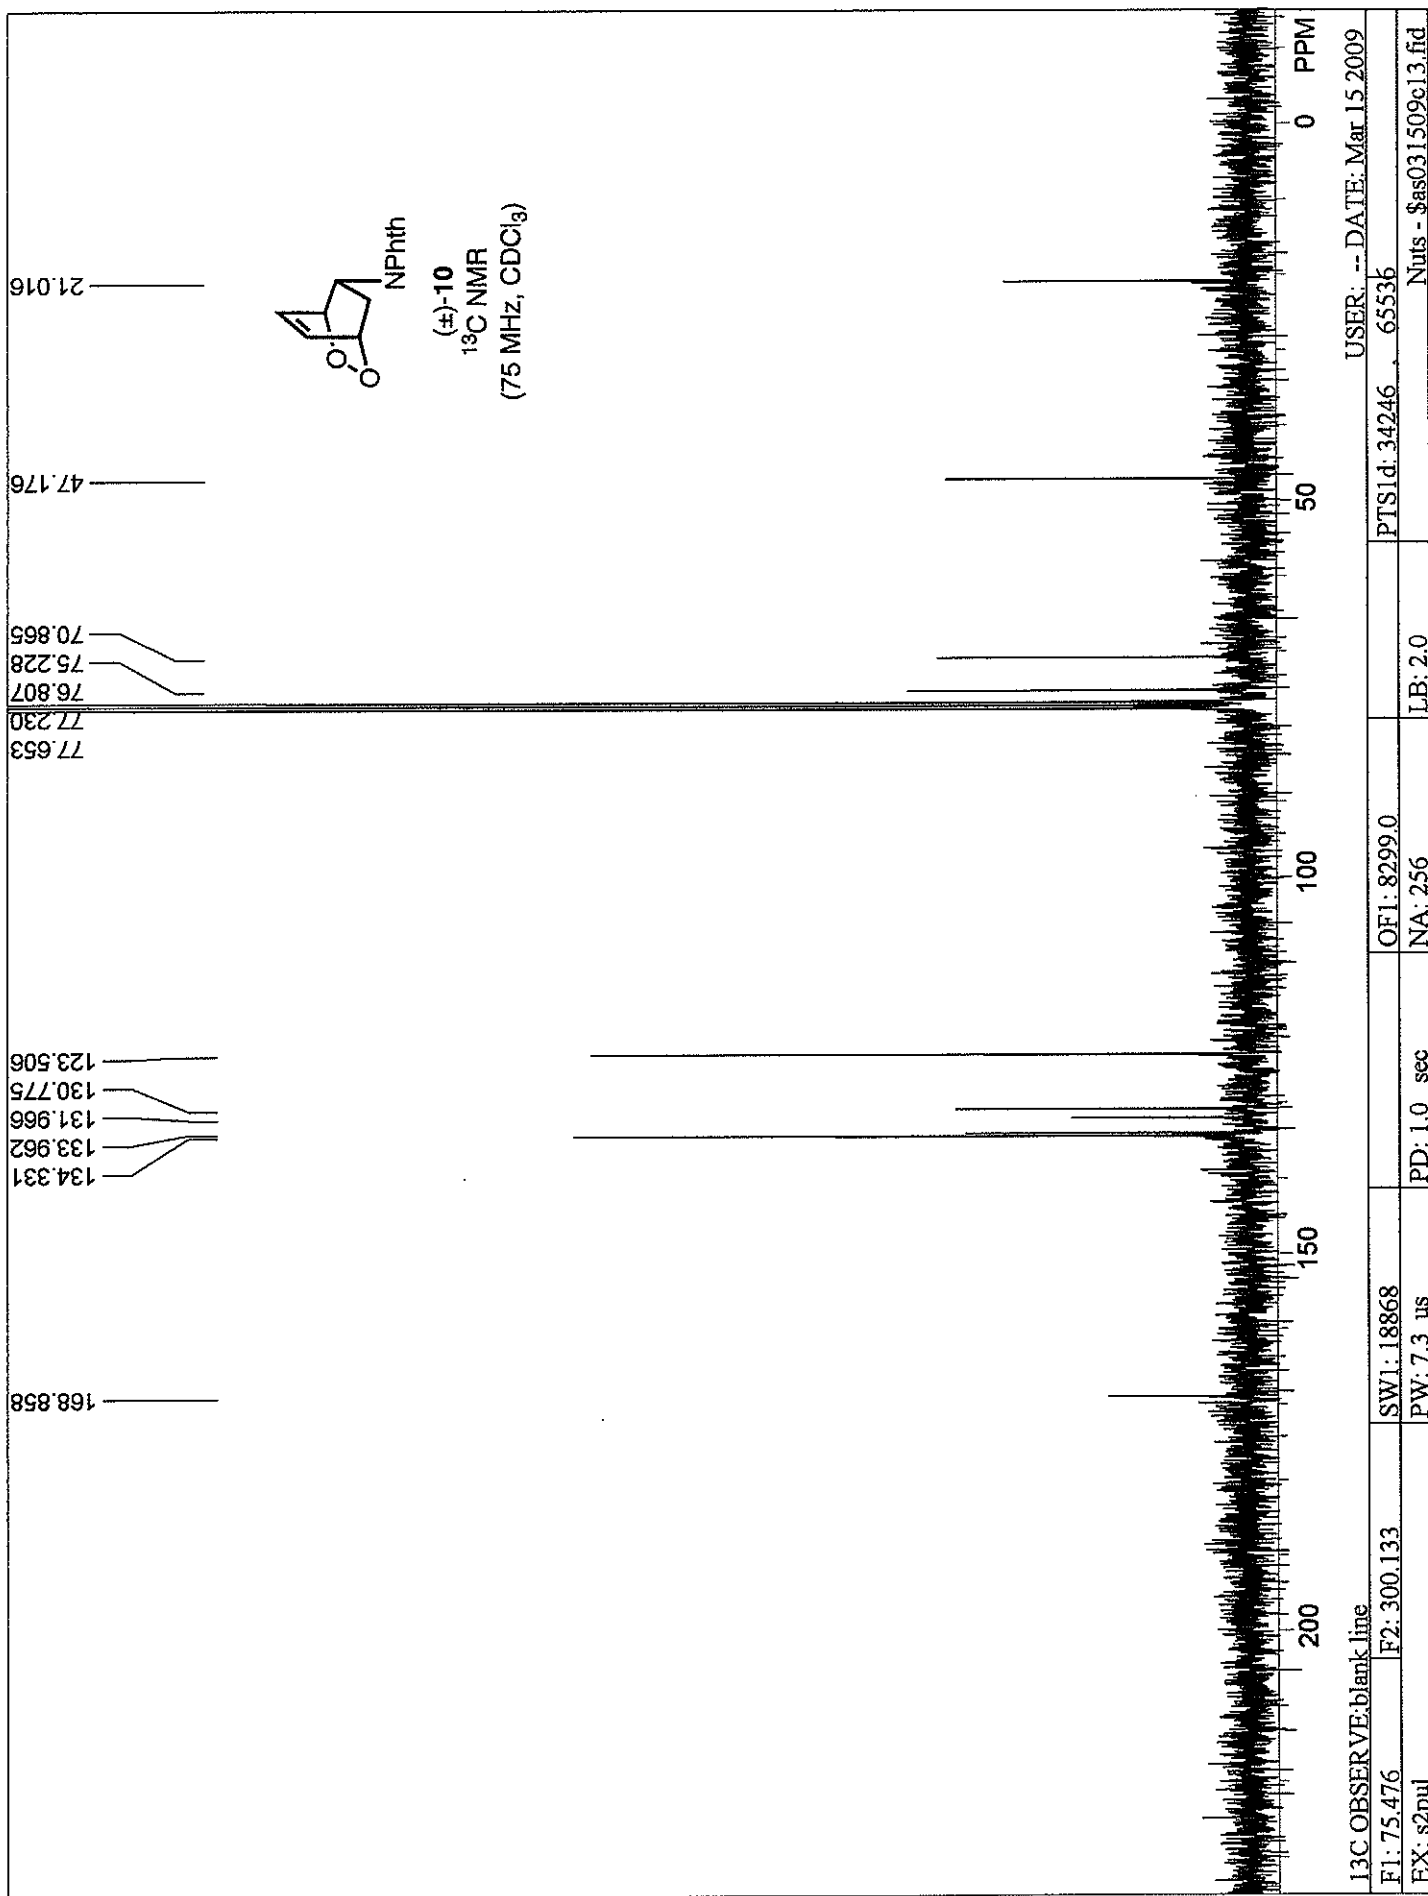

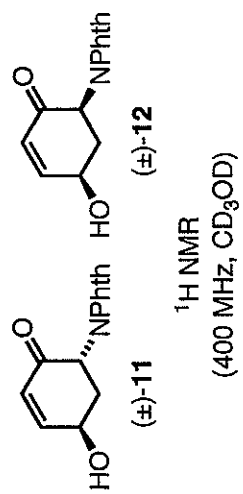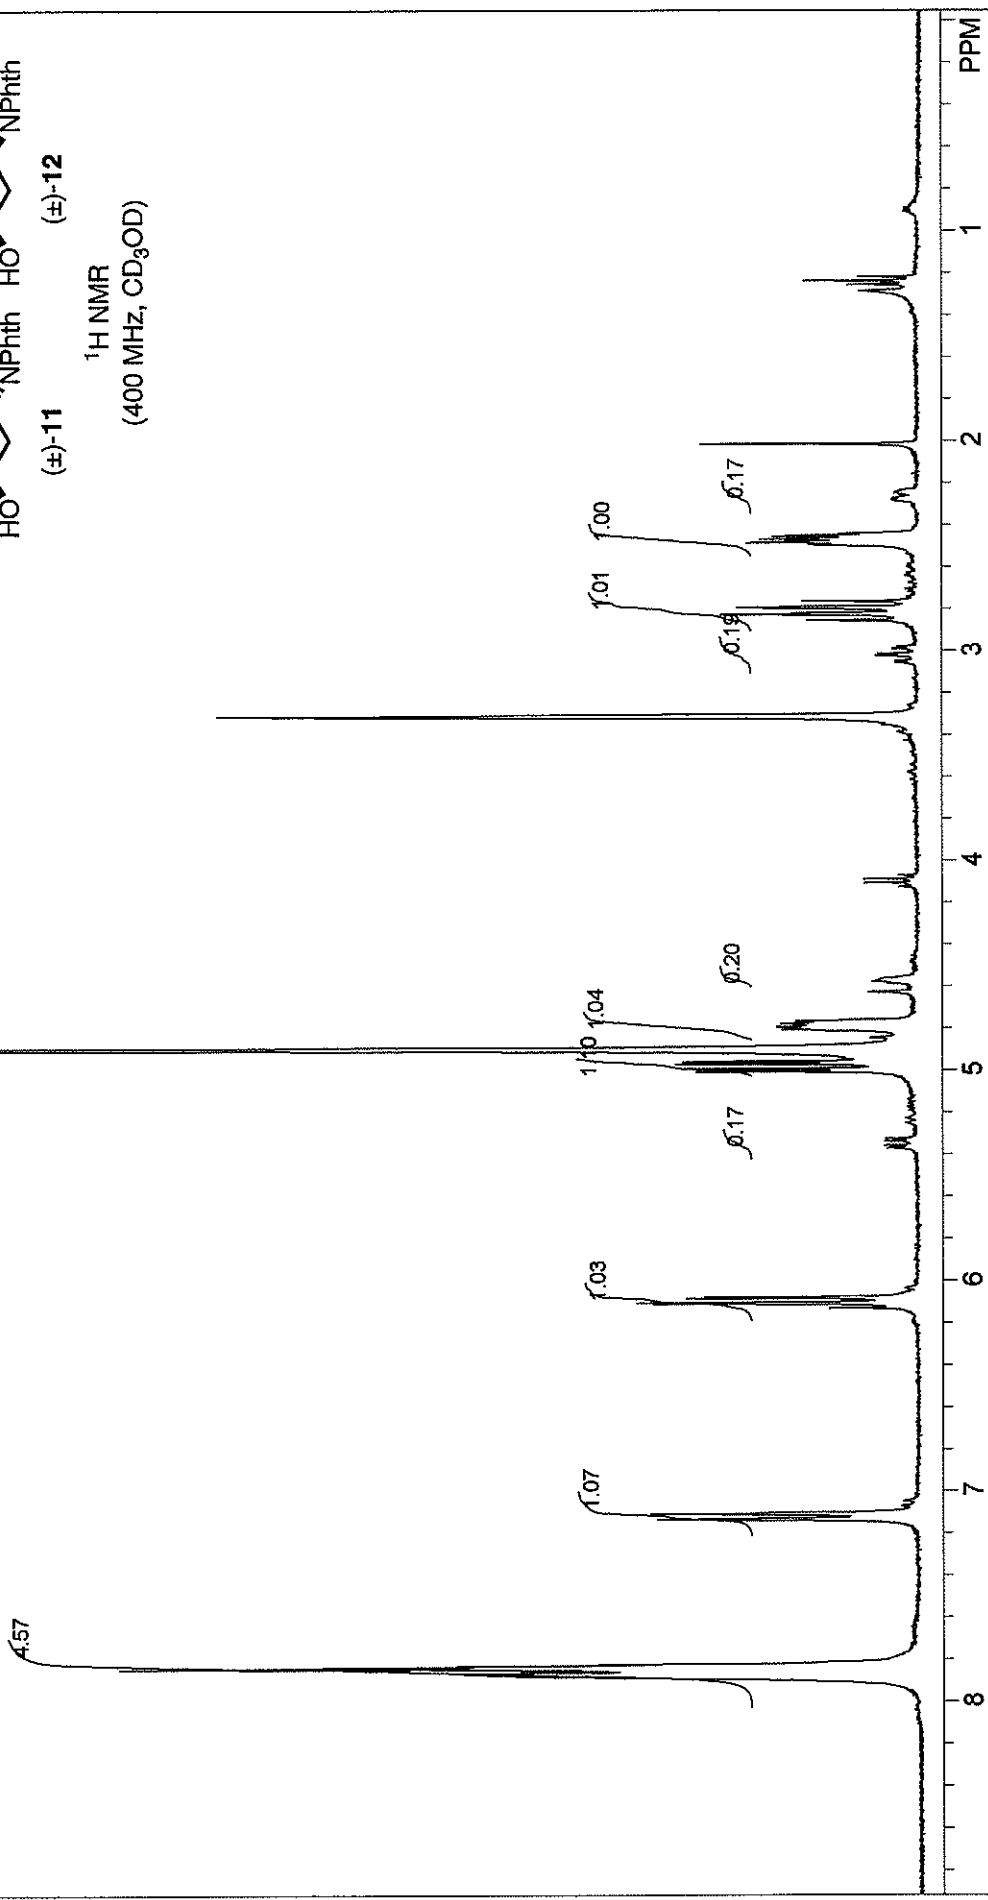

|             |             |                             |                       |
|-------------|-------------|-----------------------------|-----------------------|
| .blank line |             | USER: --- DATE: Nov 12 2009 |                       |
| F1: 399.747 | F2: 100.525 | OF1: 2402.1                 | P1S1d: 13132 , 16384  |
| EX: s2pul   | SW1: 6410   | NA: 8                       | LB: 0.0               |
|             | PW: 8.0 us  | PD: 1.0 sec                 | Nuts - \$ase402p2.fid |

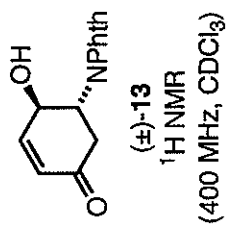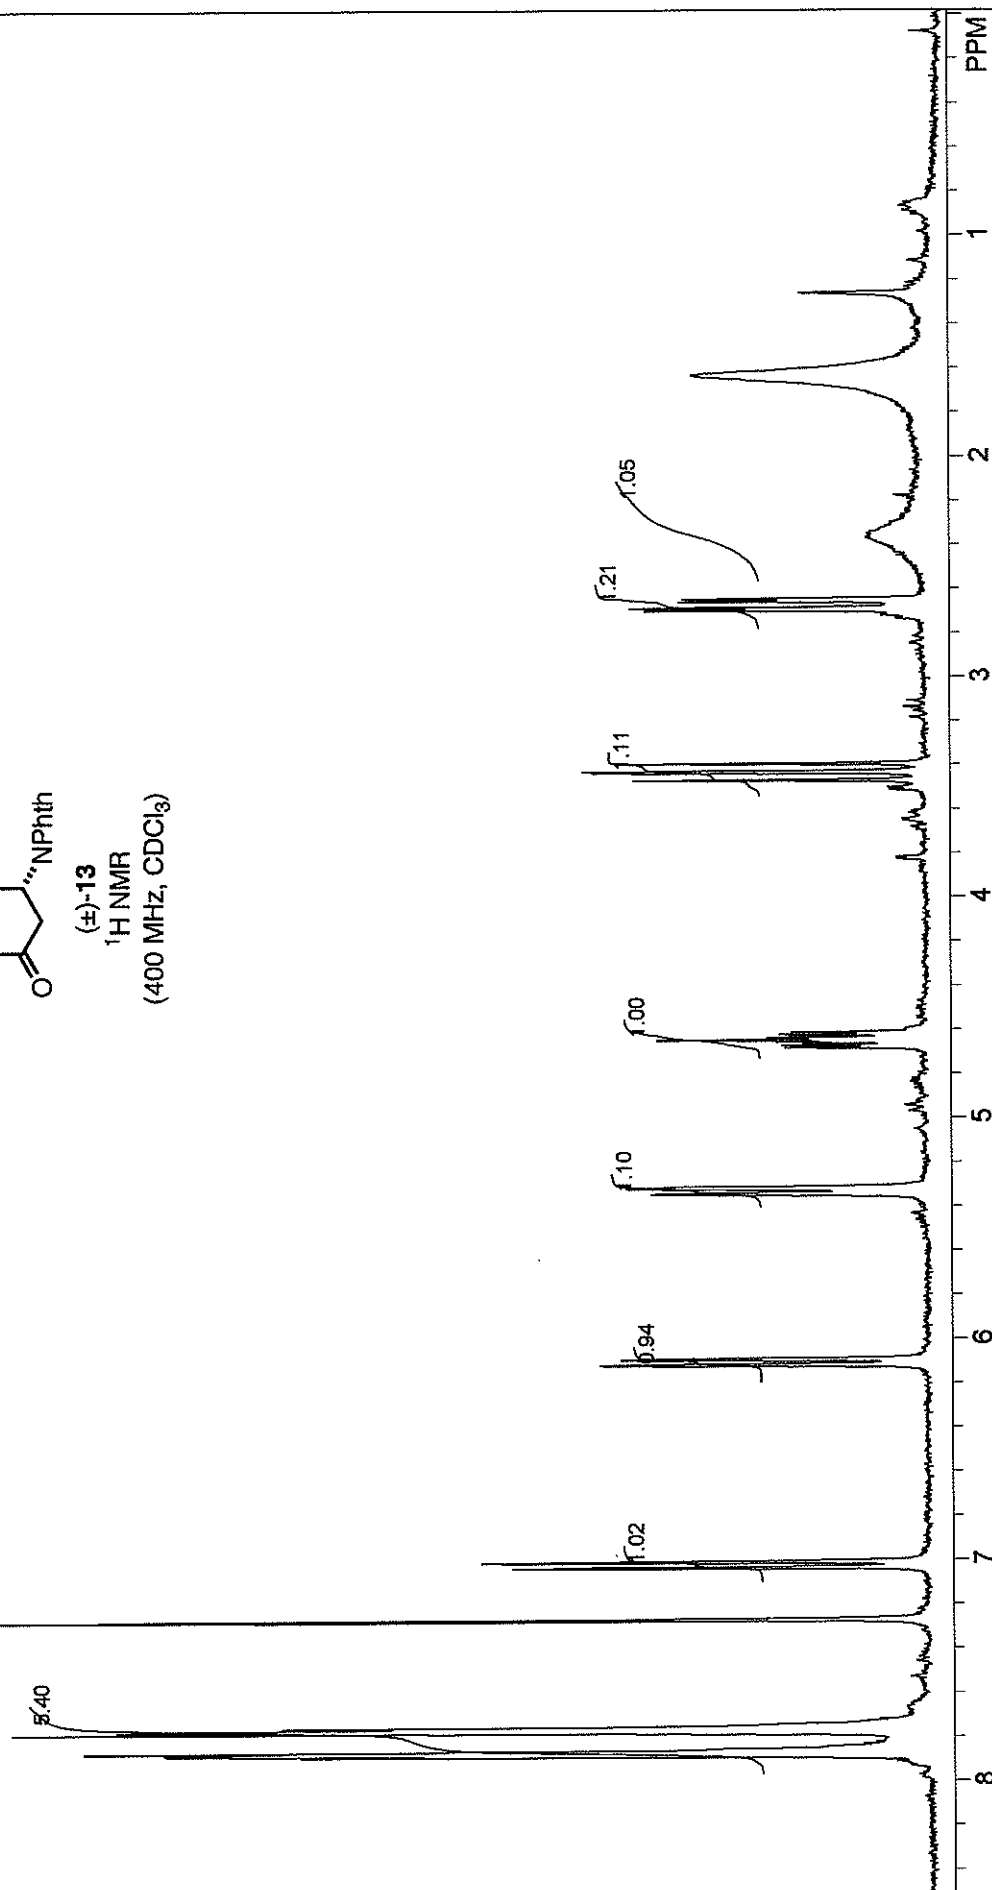

|             |                            |
|-------------|----------------------------|
| .blank line | USER: -- DATE: Jun 12 2009 |
| F1: 399.746 | PTSId: 13132_16384         |
| F2: 100.525 | OF1: 2403.7                |
| EX: s2pul   | PD: 1.0 sec                |
|             | NA: 8                      |
|             | LB: 0.5                    |
|             | Nuts - \$ase296pInd.fid    |

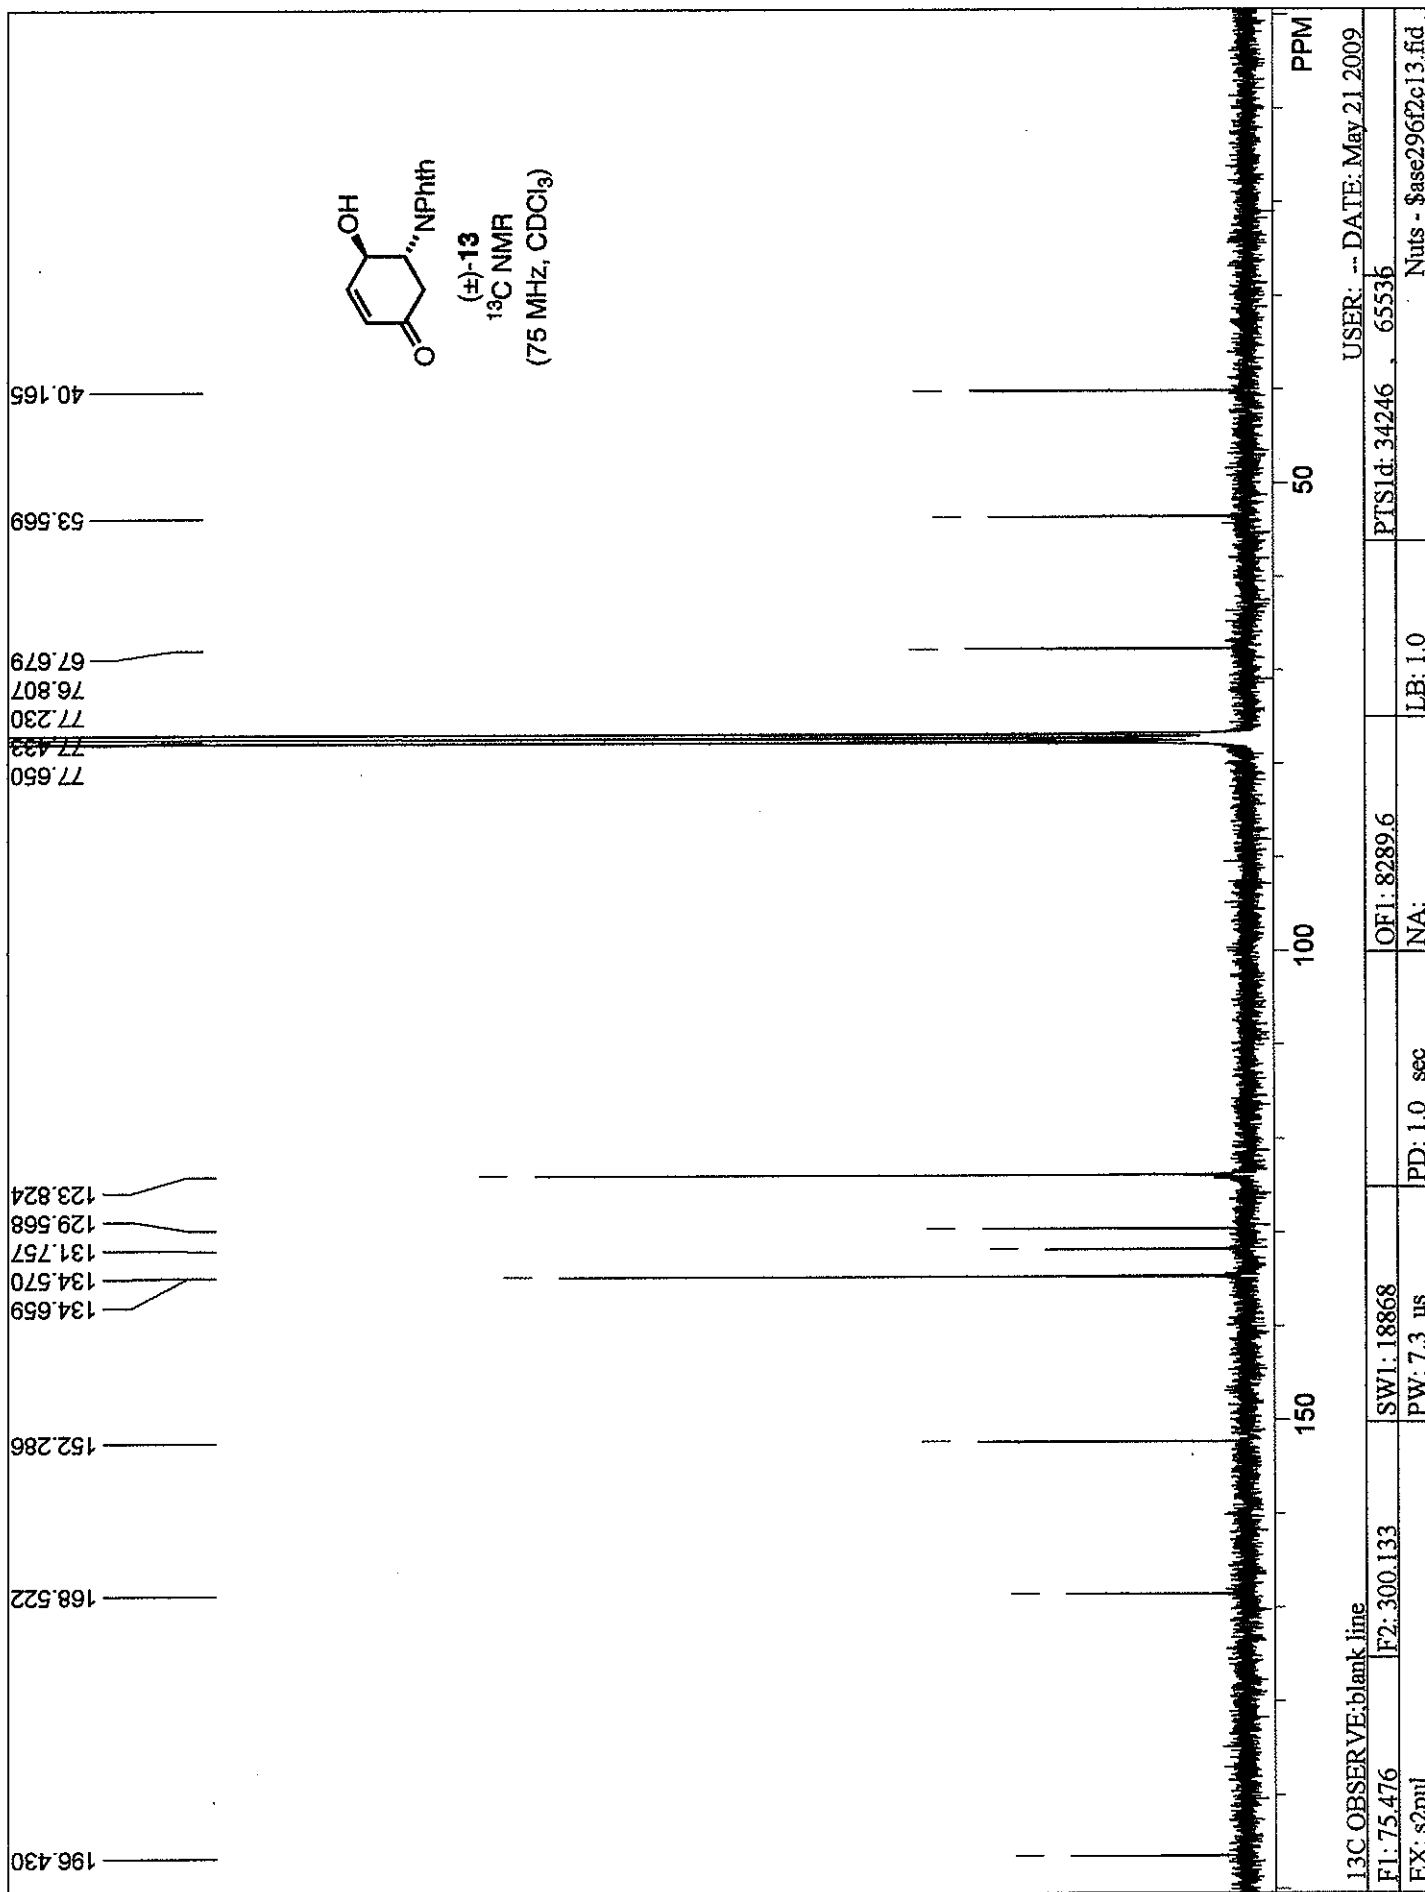

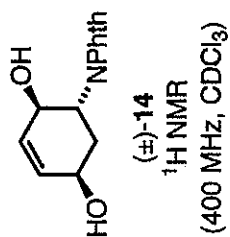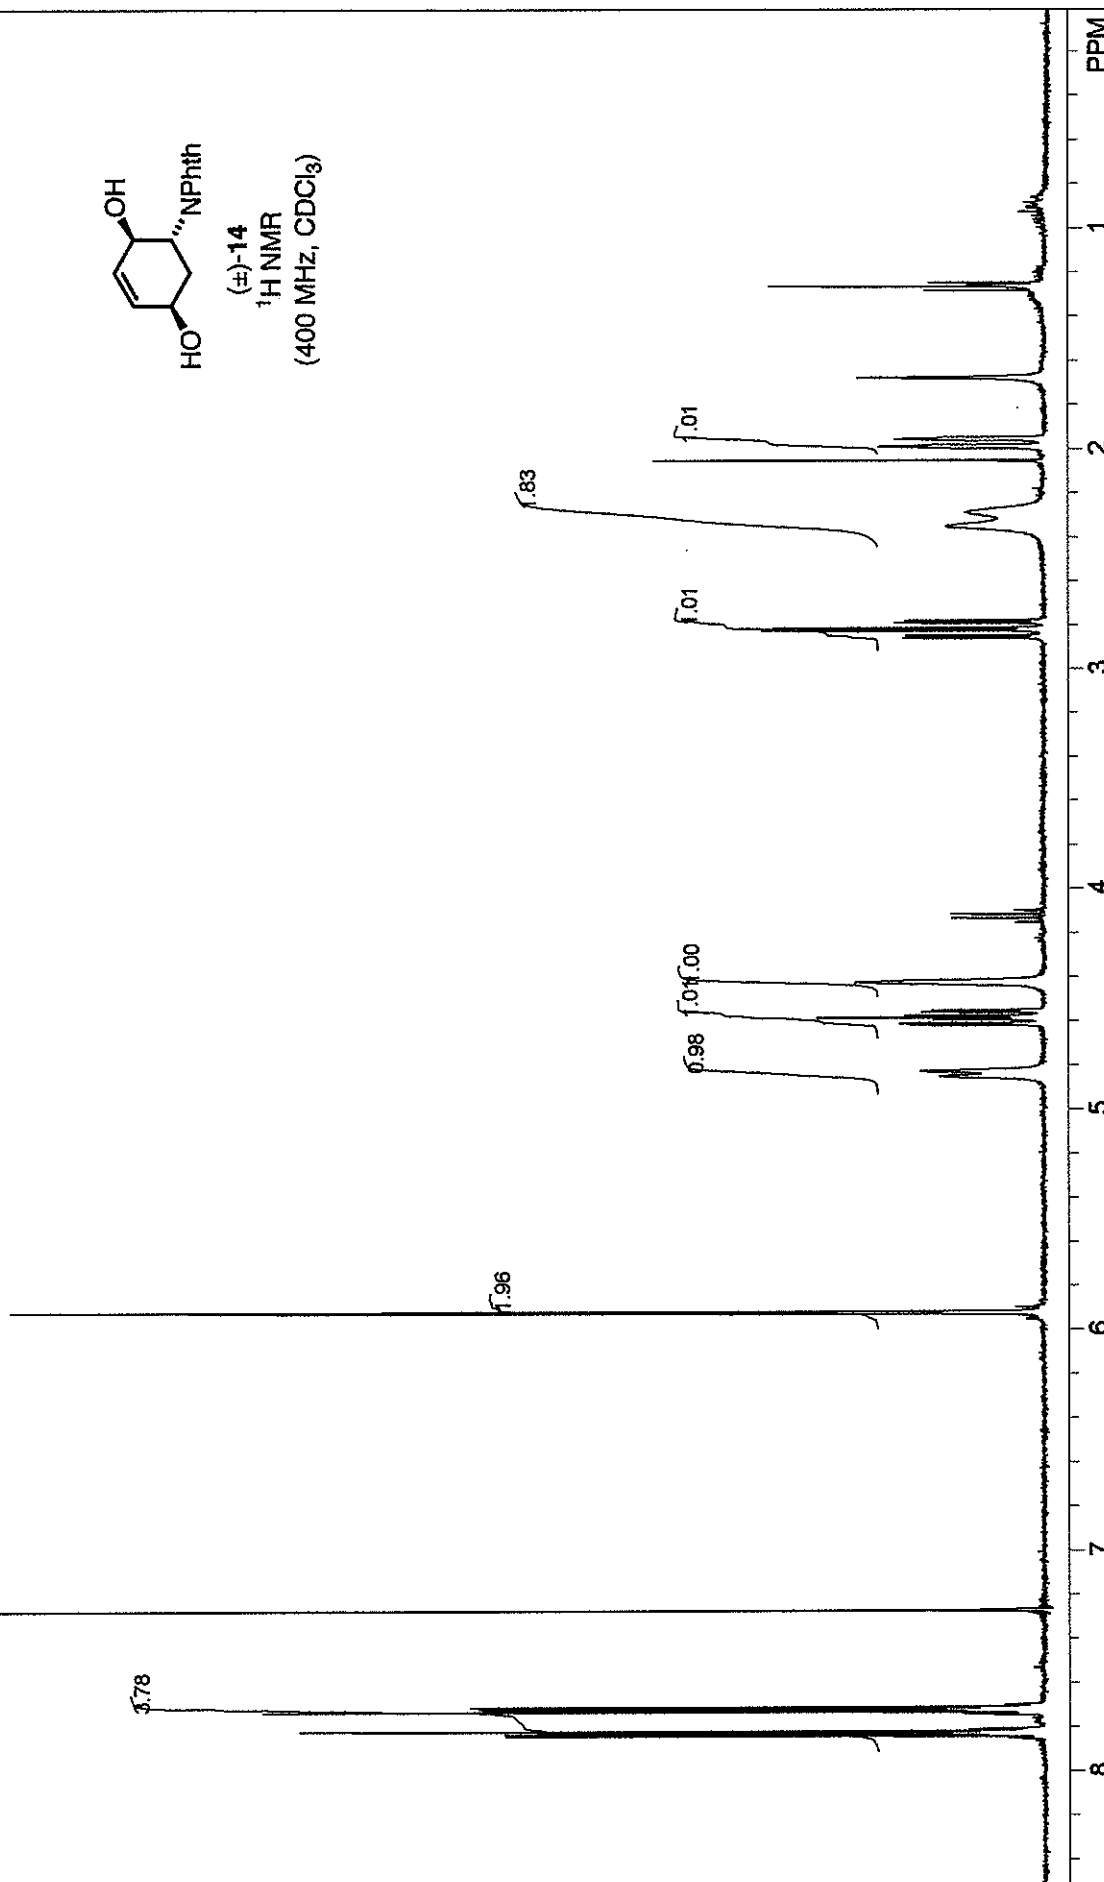

|             |             |                           |                       |
|-------------|-------------|---------------------------|-----------------------|
| .blank line |             | USER: -- DATE: Oct 1 2008 |                       |
| F1: 399.751 | F2: 100.526 | SW1: 6410                 | OF1: 2403.4           |
| EX: s2pul   | PW: 8.0 us  | PD: 1.0 sec               | NA: 8                 |
|             |             | LB: 0.0                   | PTS1d: 13132          |
|             |             |                           | 1638#                 |
|             |             |                           | Nuts - \$ase157fd.fid |

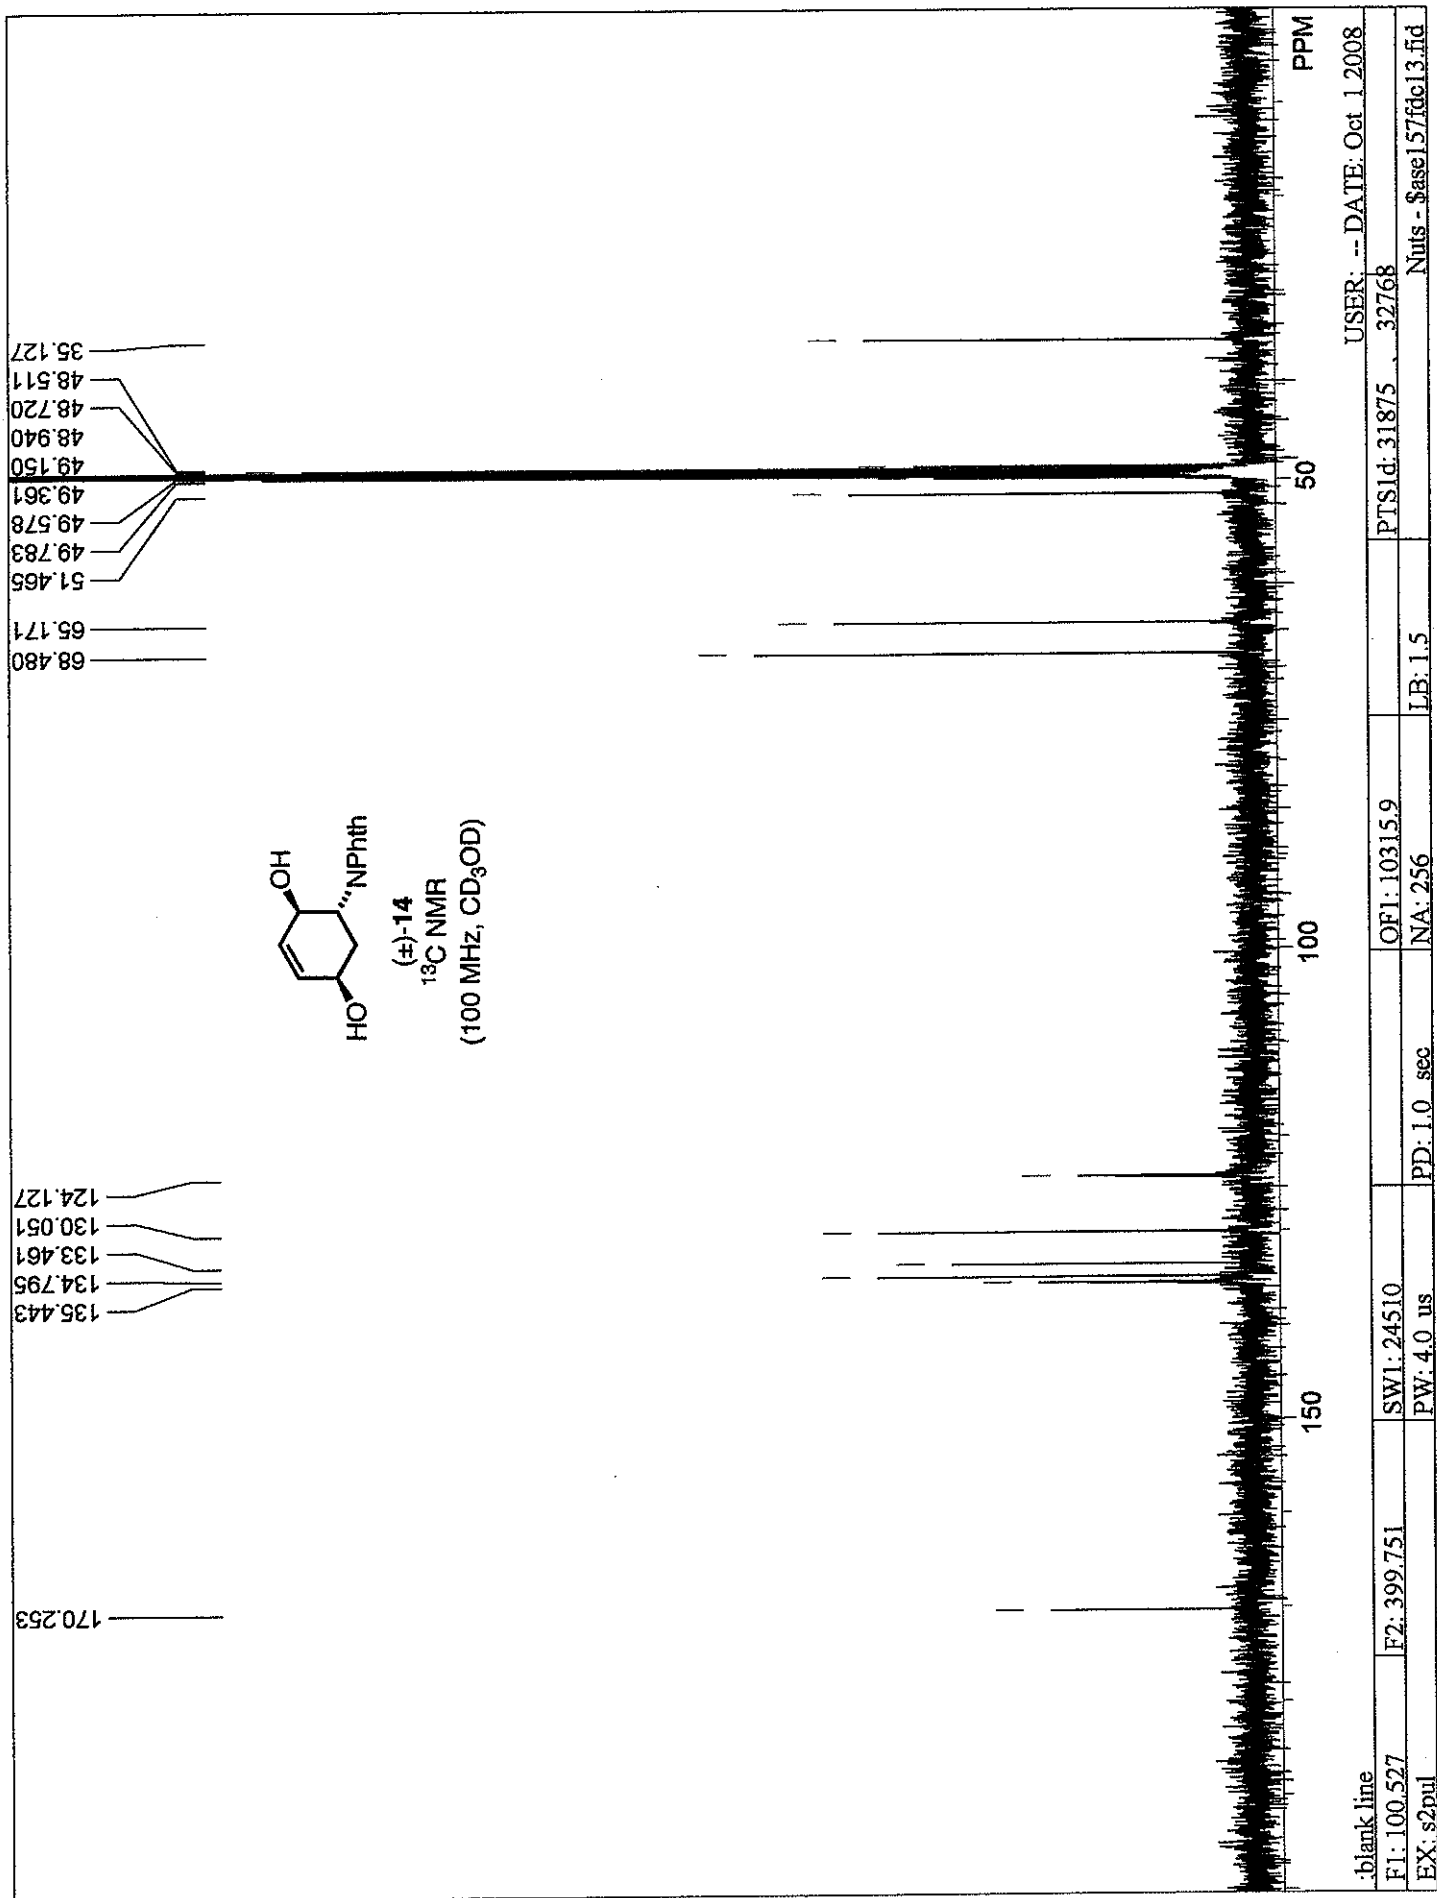

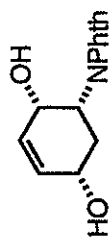

(±)-15  
<sup>1</sup>H NMR  
(400 MHz, CDCl<sub>3</sub>)

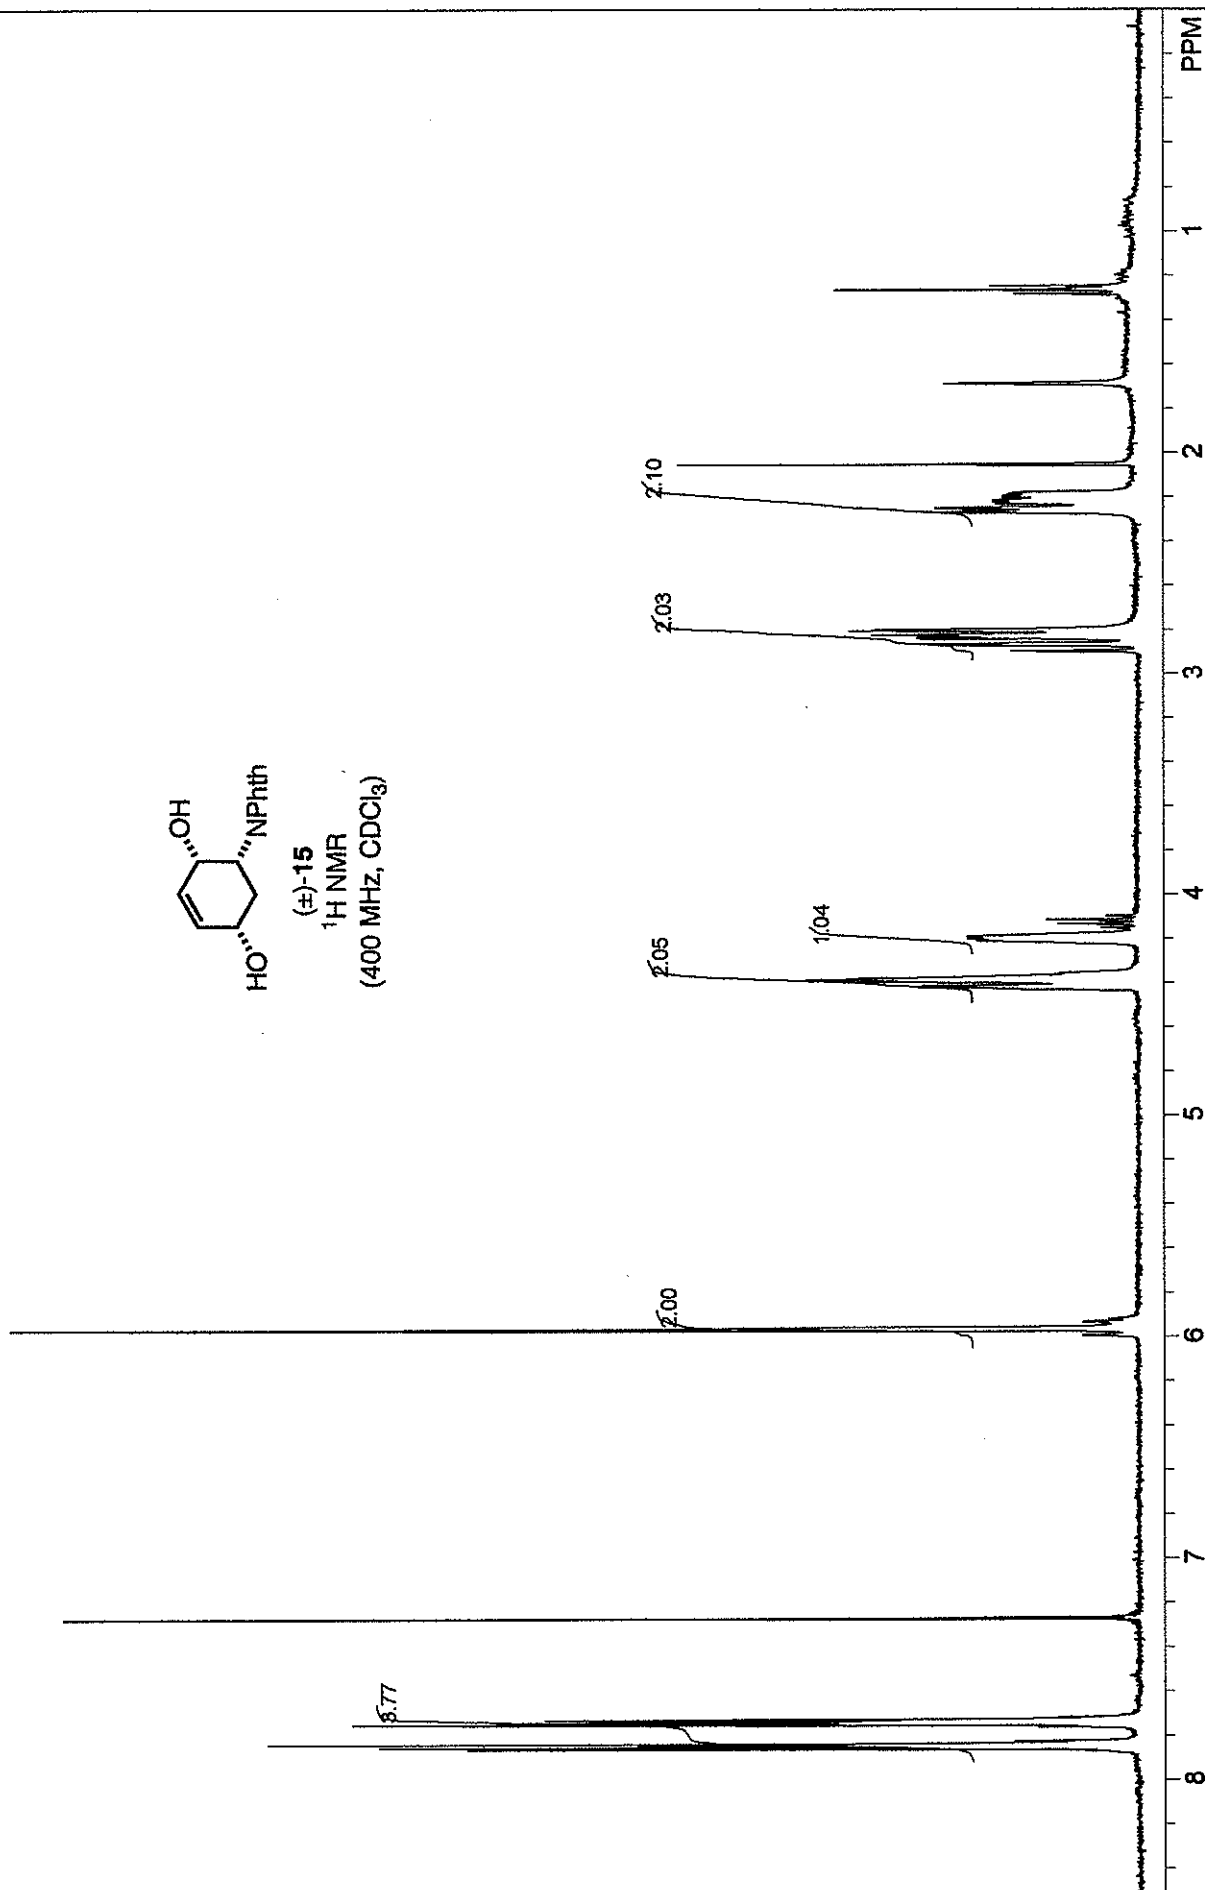

|             |             |                           |                         |
|-------------|-------------|---------------------------|-------------------------|
| .blank line |             | USER: -- DATE: Oct 3 2008 |                         |
| F1: 399.751 | F2: 100.526 | PTSID: 13132              | 16384                   |
| EX: s2pul   | PW: 8.0 us  | PD: 1.0 sec               | LB: 0.0                 |
|             |             | OF1: 2403.2               | NA: 8                   |
|             |             |                           | Nuts - \$ase158fggg.fid |



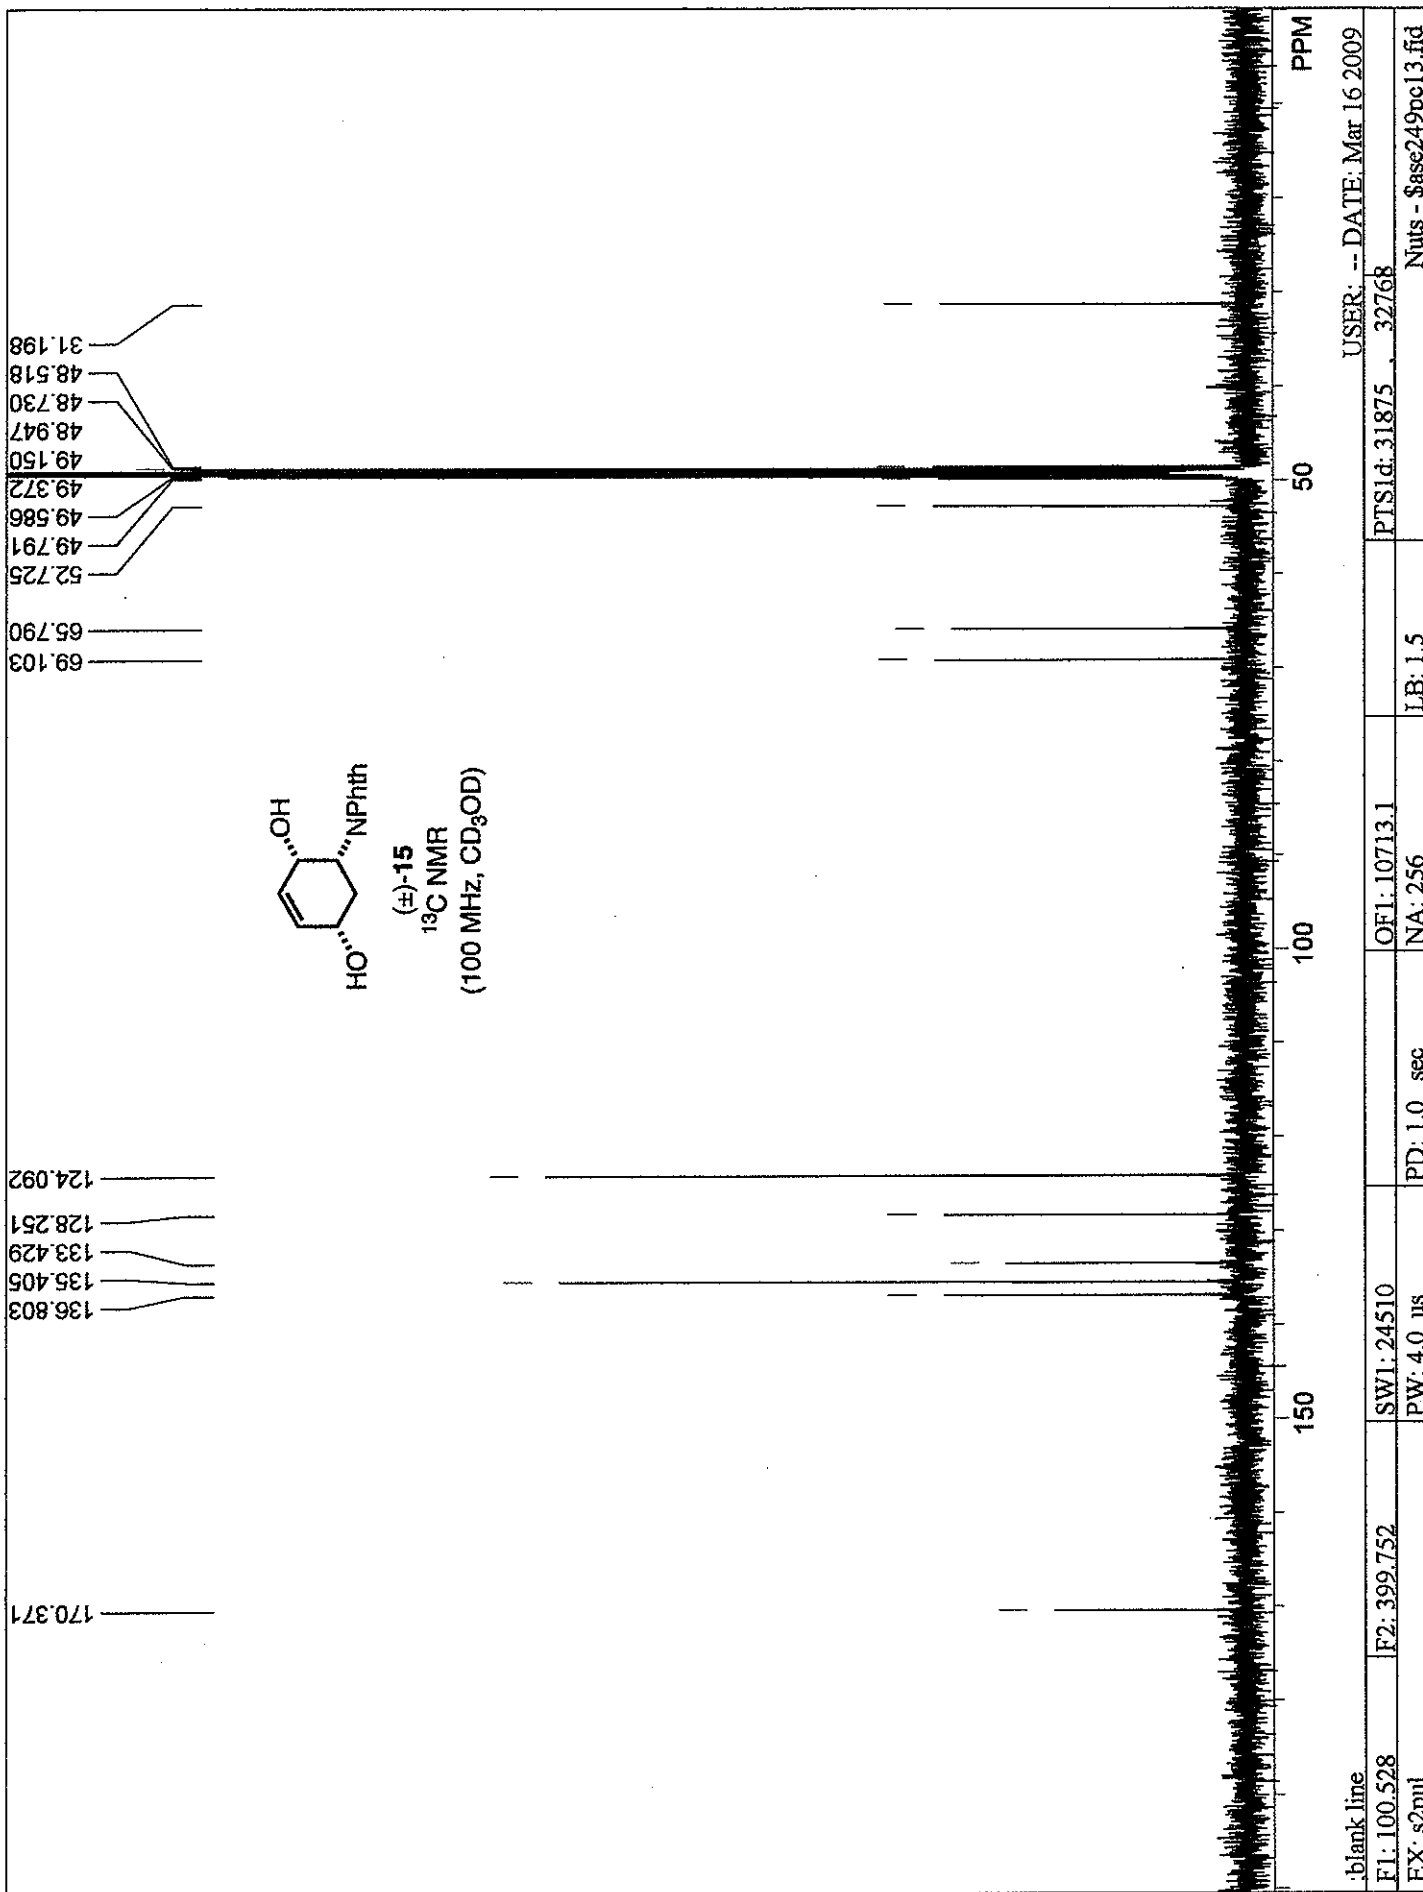

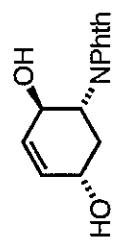

(±)-16  
<sup>1</sup>H NMR  
(400 MHz, CD<sub>3</sub>OD)

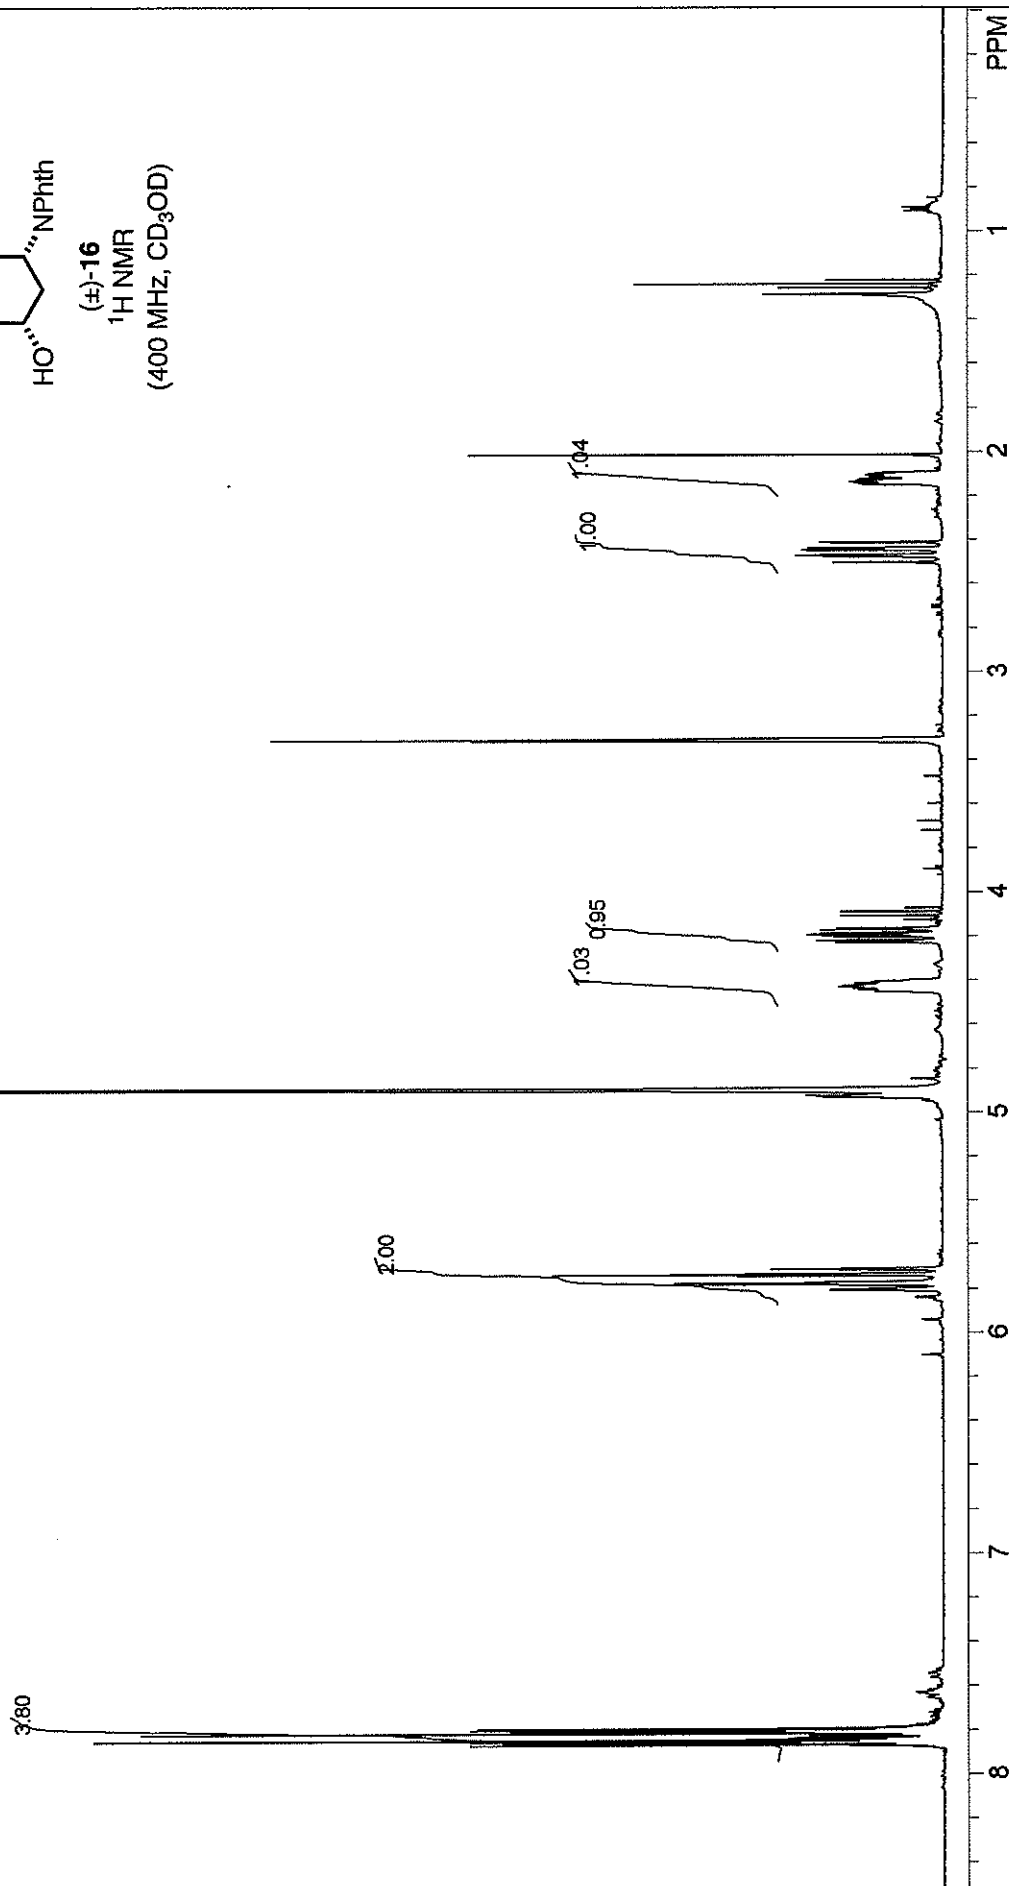

|             |             |                            |                      |
|-------------|-------------|----------------------------|----------------------|
| .blank line |             | USER: -- DATE: Nov 14 2009 |                      |
| F1: 399.747 | F2: 100.525 | OF1: 2401.4                | PTSId: 13132 , 16384 |
| EX: s2pul   | PW: 8.0 us  | NA: 8                      | LB: 0.0              |
|             | PD: 1.0 sec | Nuts - \$ase405cr.fid      |                      |

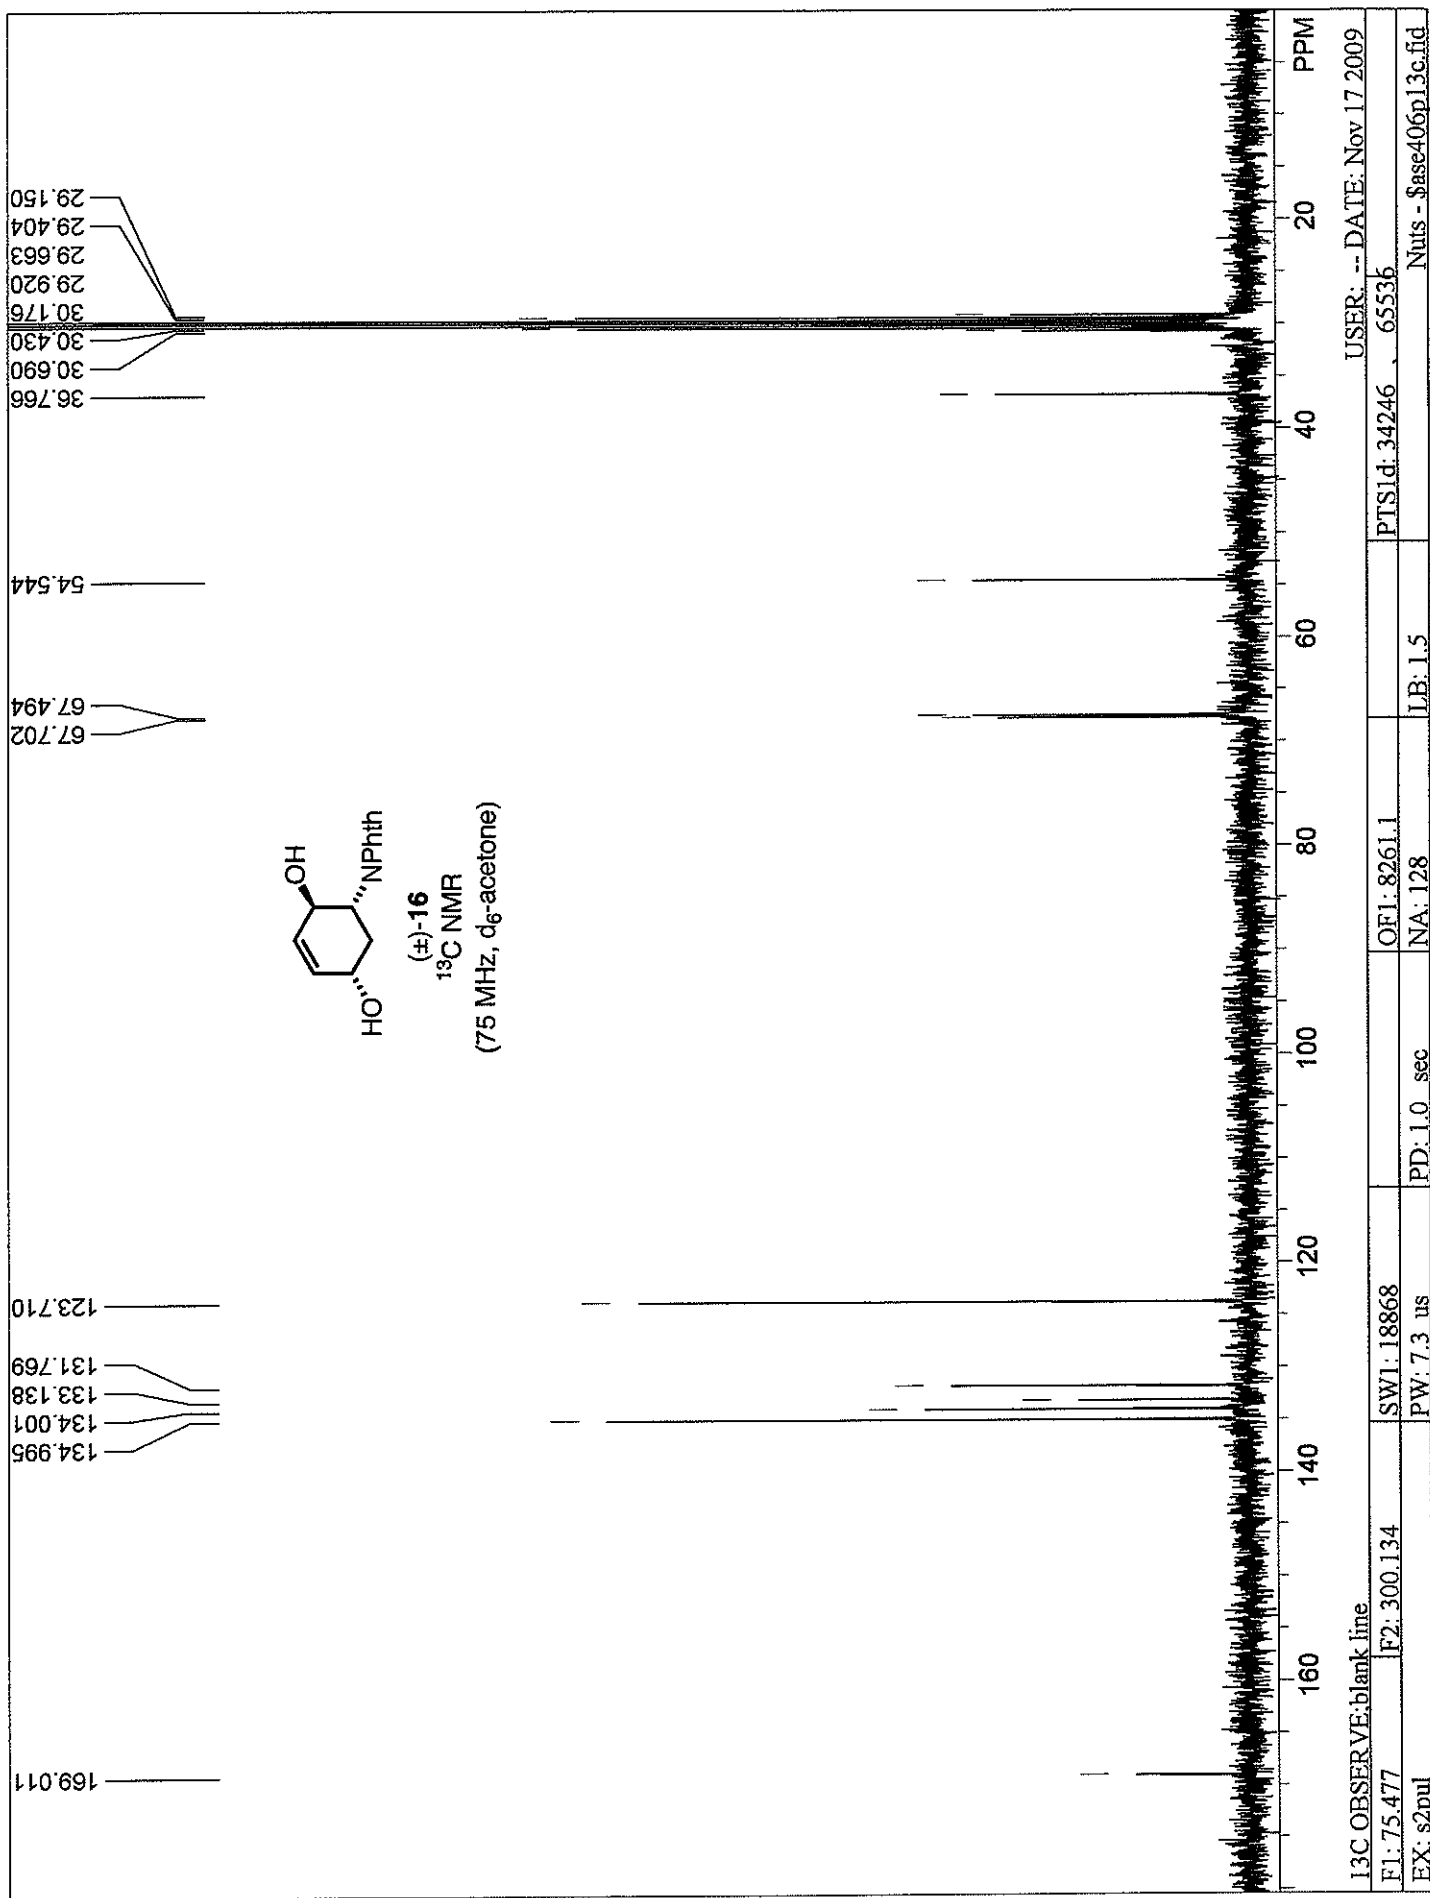

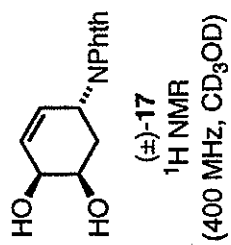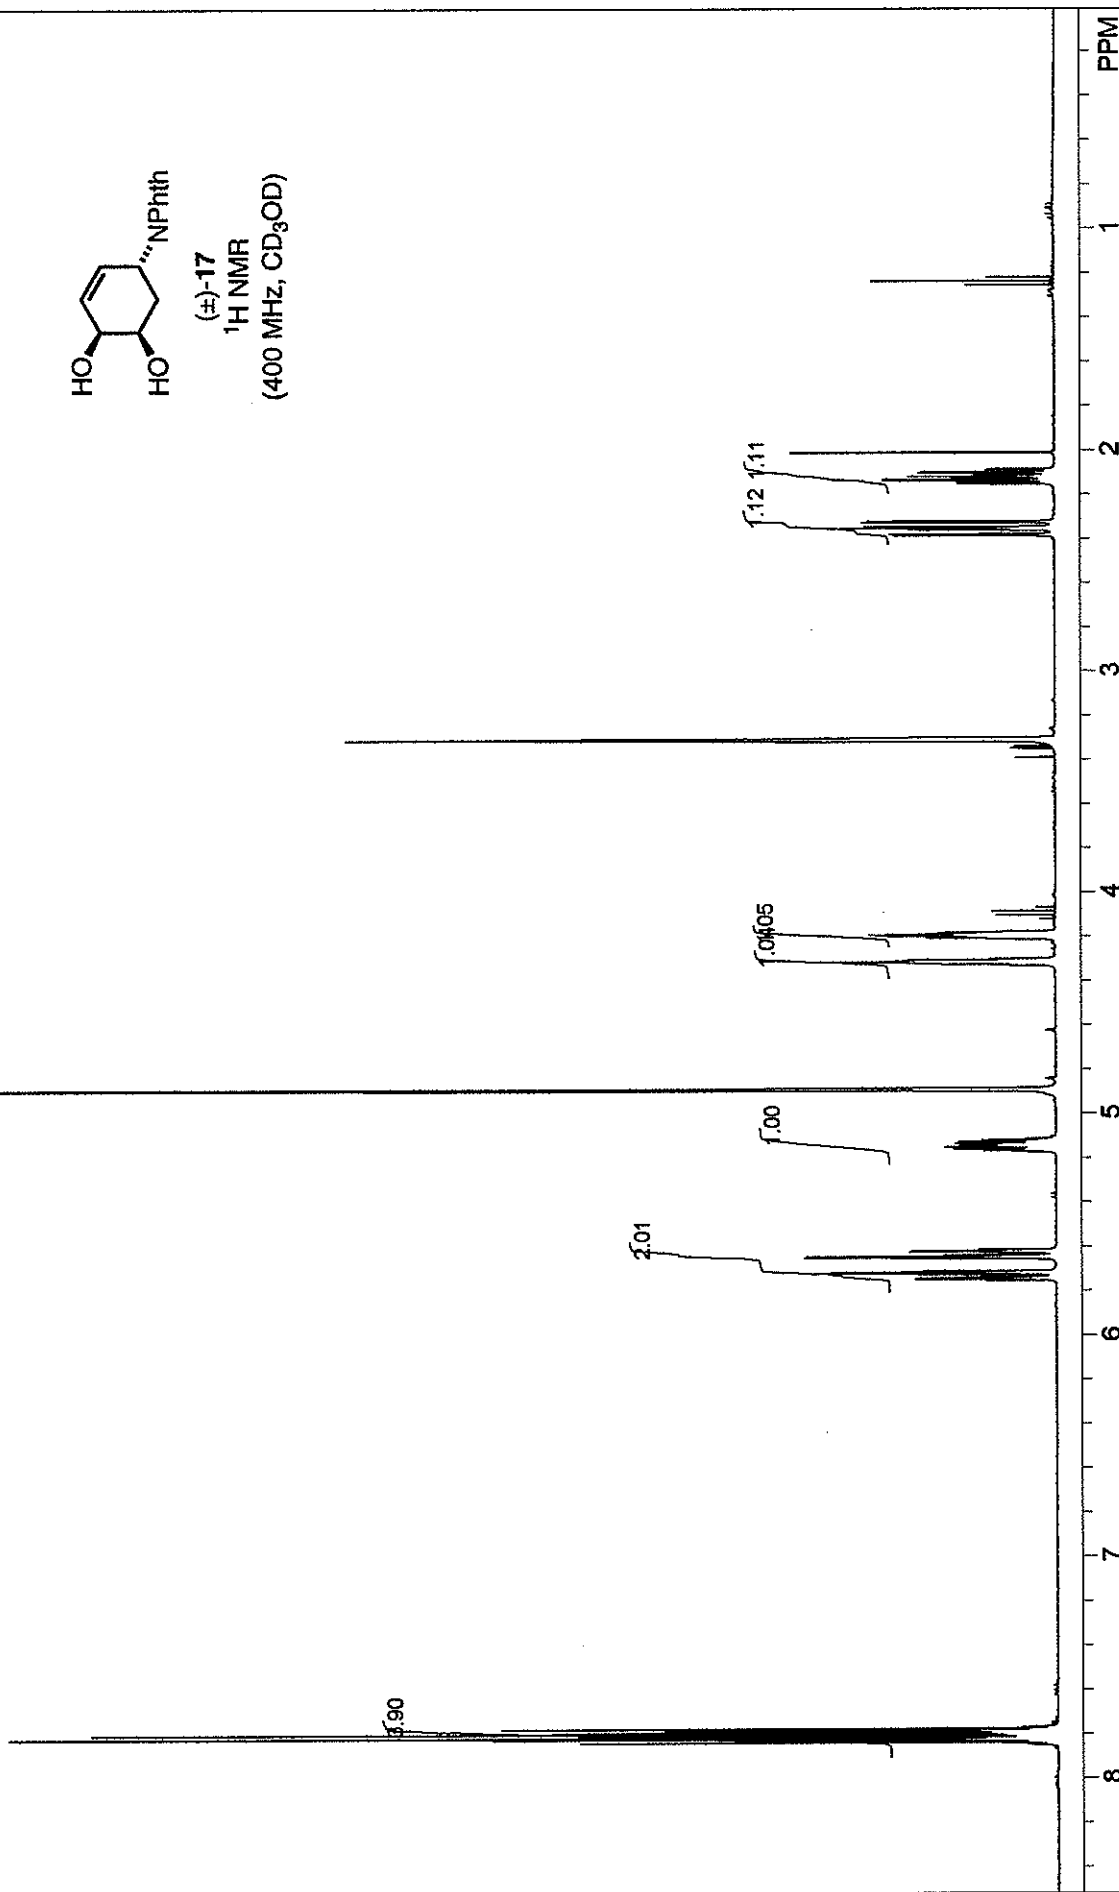

|             |             |                            |                       |
|-------------|-------------|----------------------------|-----------------------|
| .blank line |             | USER: -- DATE: Oct 15 2008 |                       |
| F1: 399.753 | F2: 100.527 | OF1: 2401.3                | PTS1d: 13132 1638#    |
| EX: s2pul   | SW1: 6410   | NA: 8                      | I.B: 0.0              |
|             | PW: 8.0 us  | PD: 1.0 sec                | Nuts - \$ase162fd.fid |

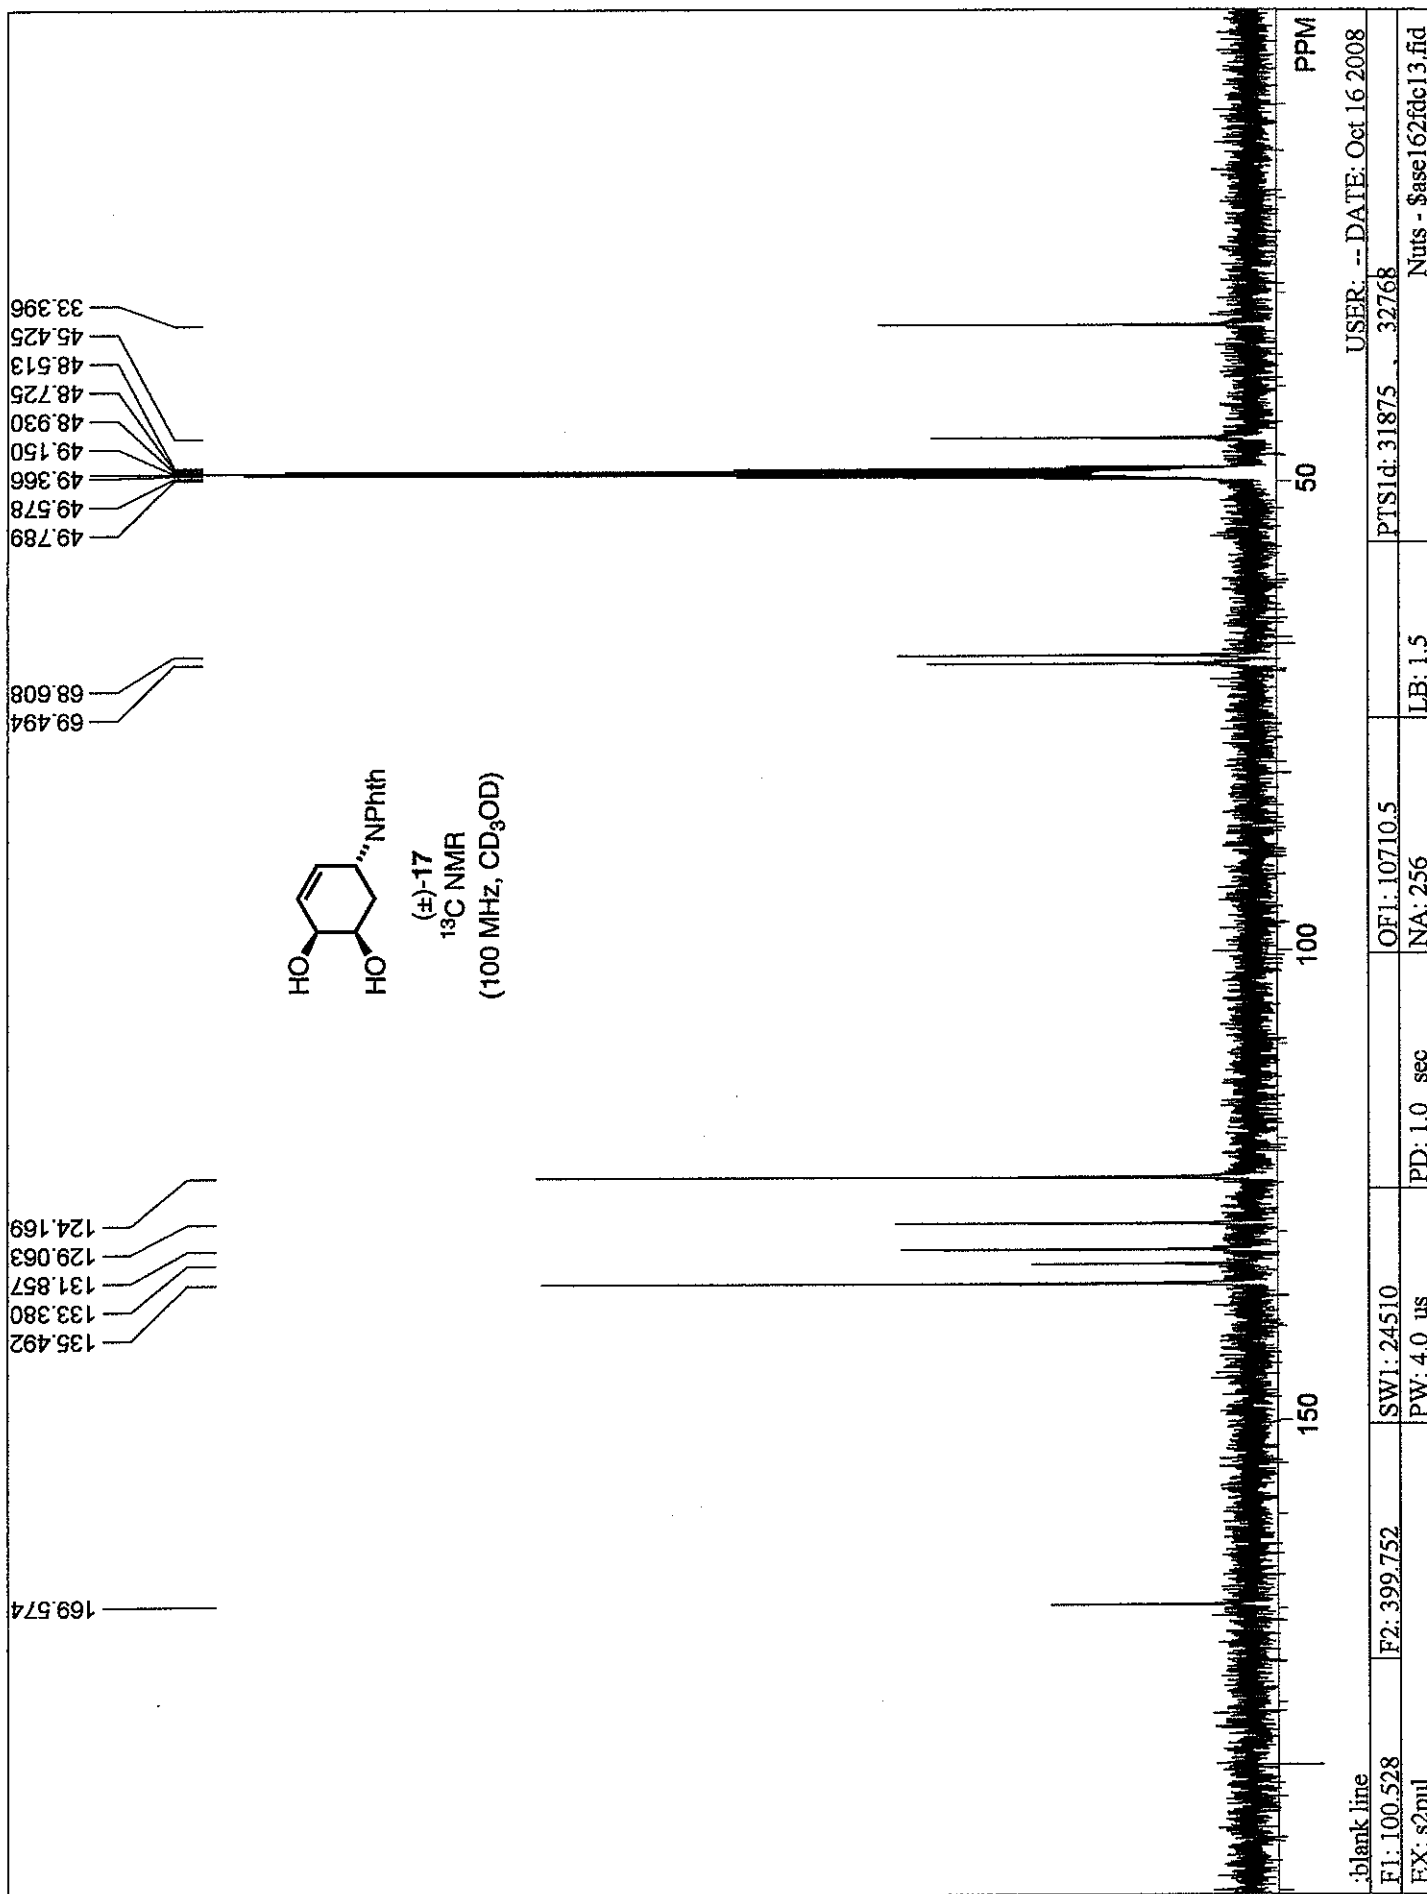

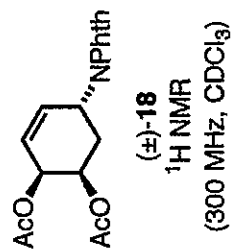

8.29

0.02

4.00

0.94

4.15

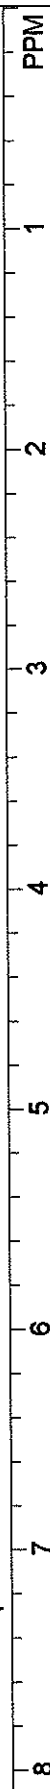

STANDARD 1H OBSERVE:blank line  
F1: 300.133 F2: 75.476 SW1: 4803 PD: 1.0 sec  
EX: s2pul PW: 6.3 us

USER: -- DATE: Nov 10 2008  
PTS1d: 9596 . 16384  
NA: 8  
LB: 0.0  
Nuts - \$ase169fdd.fid

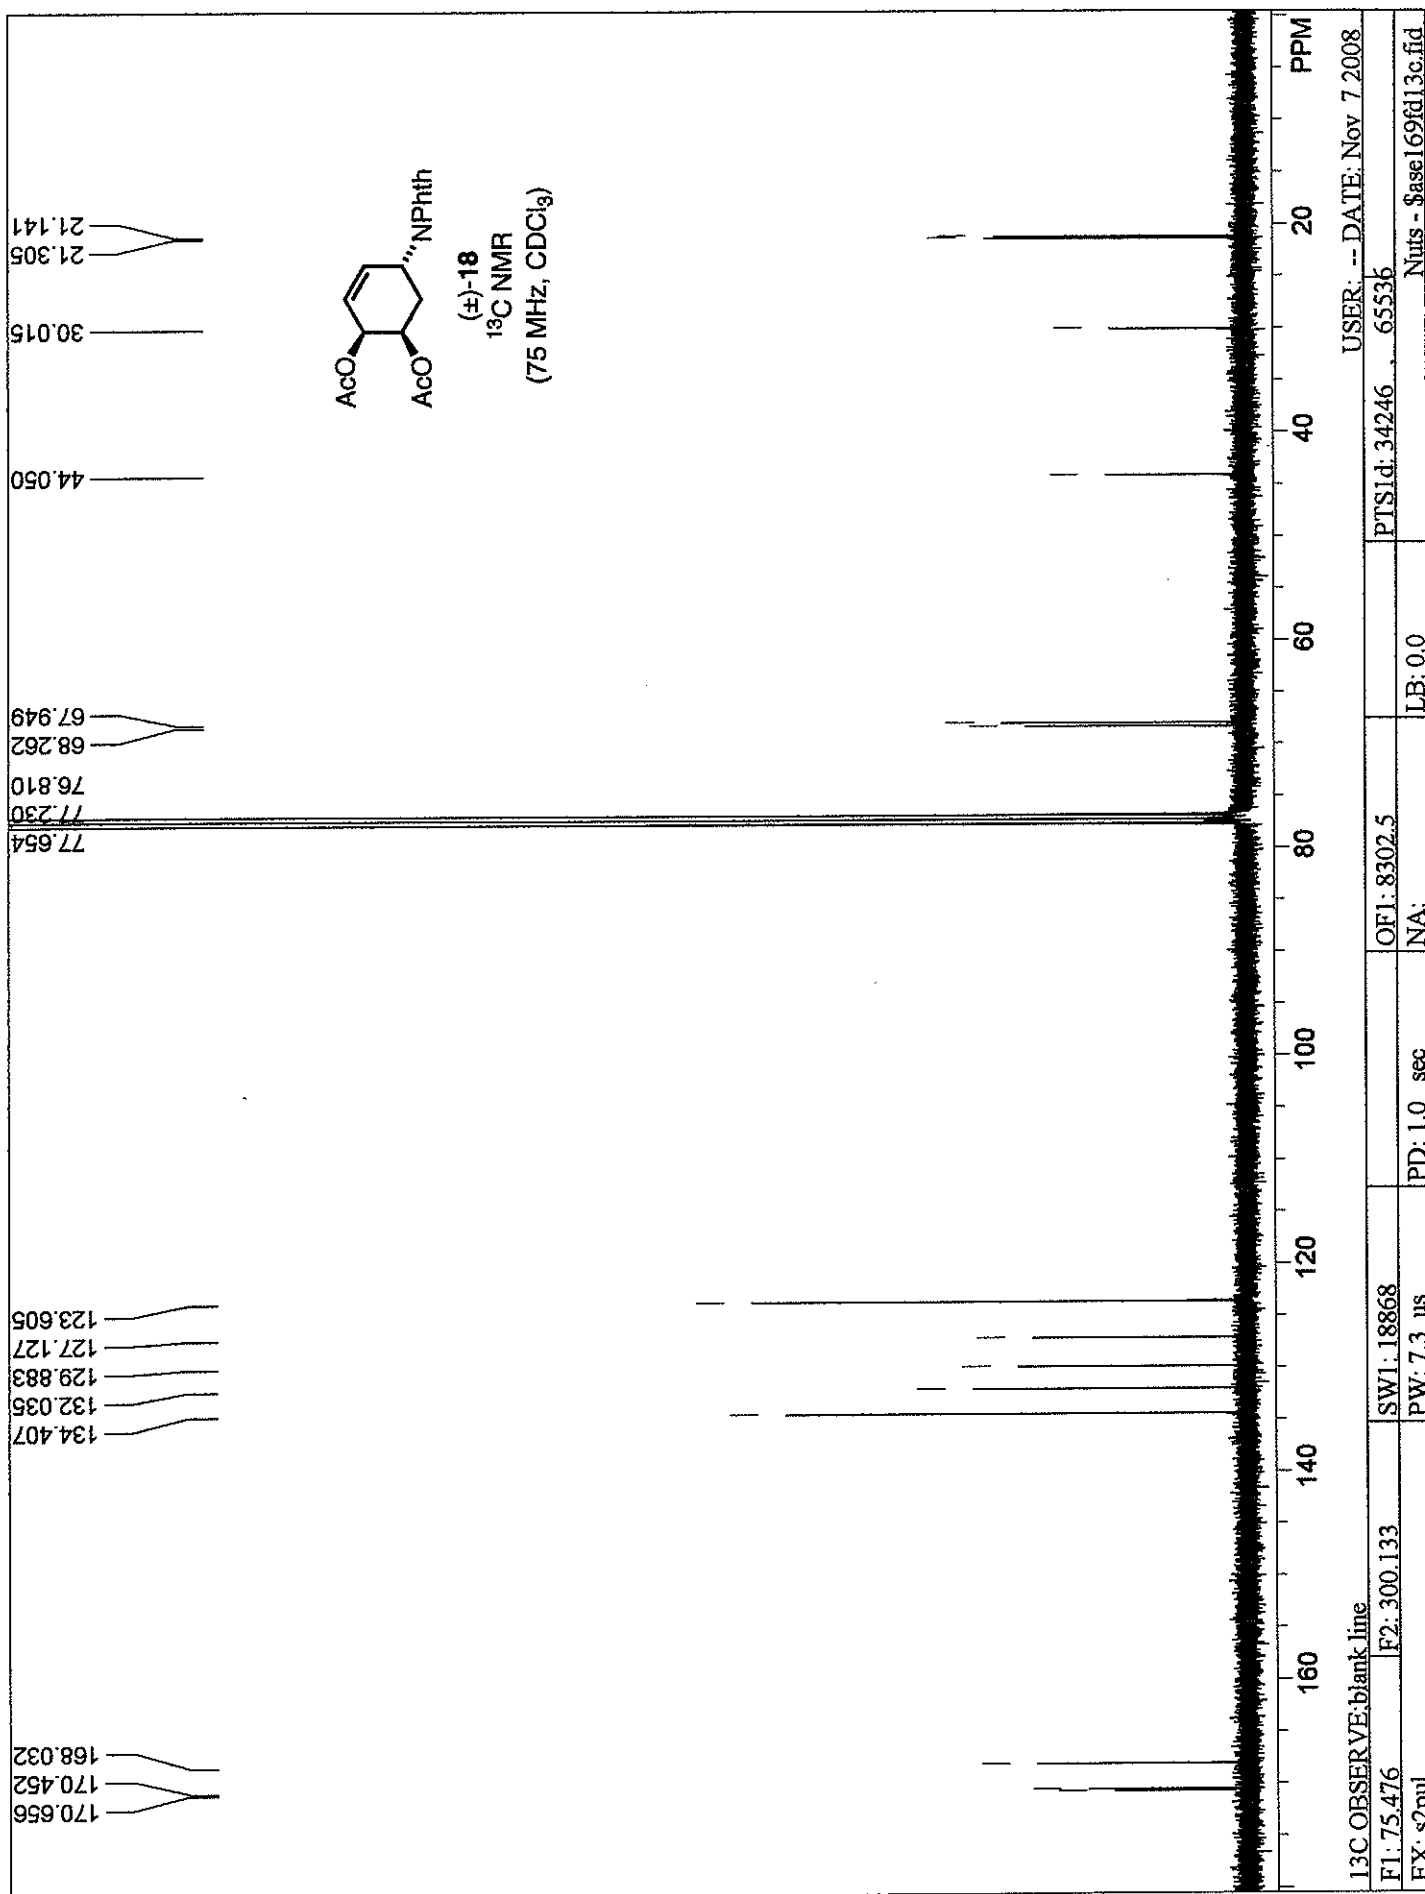

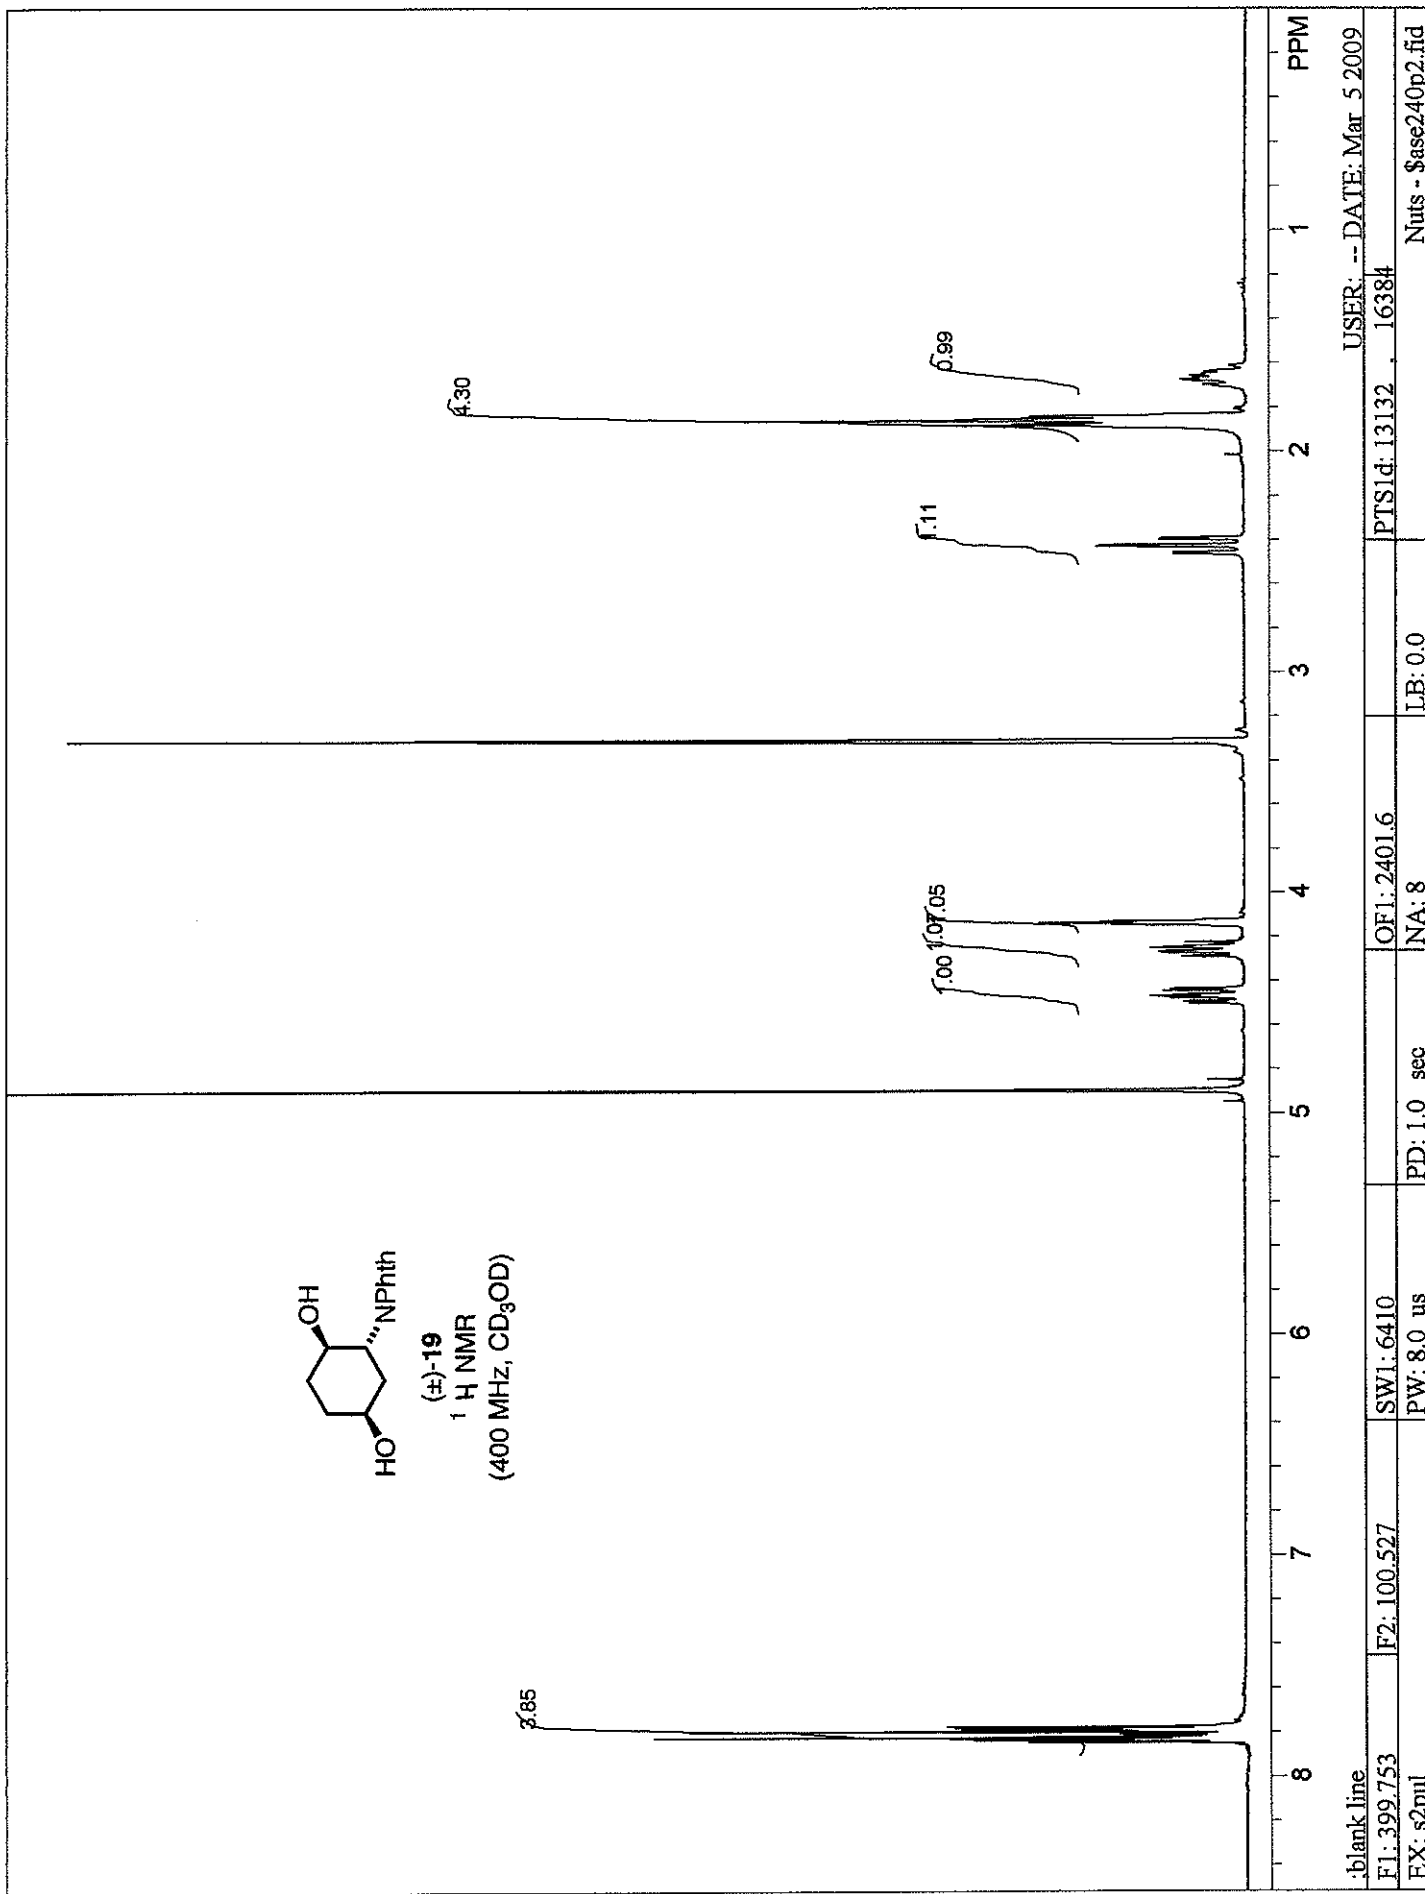



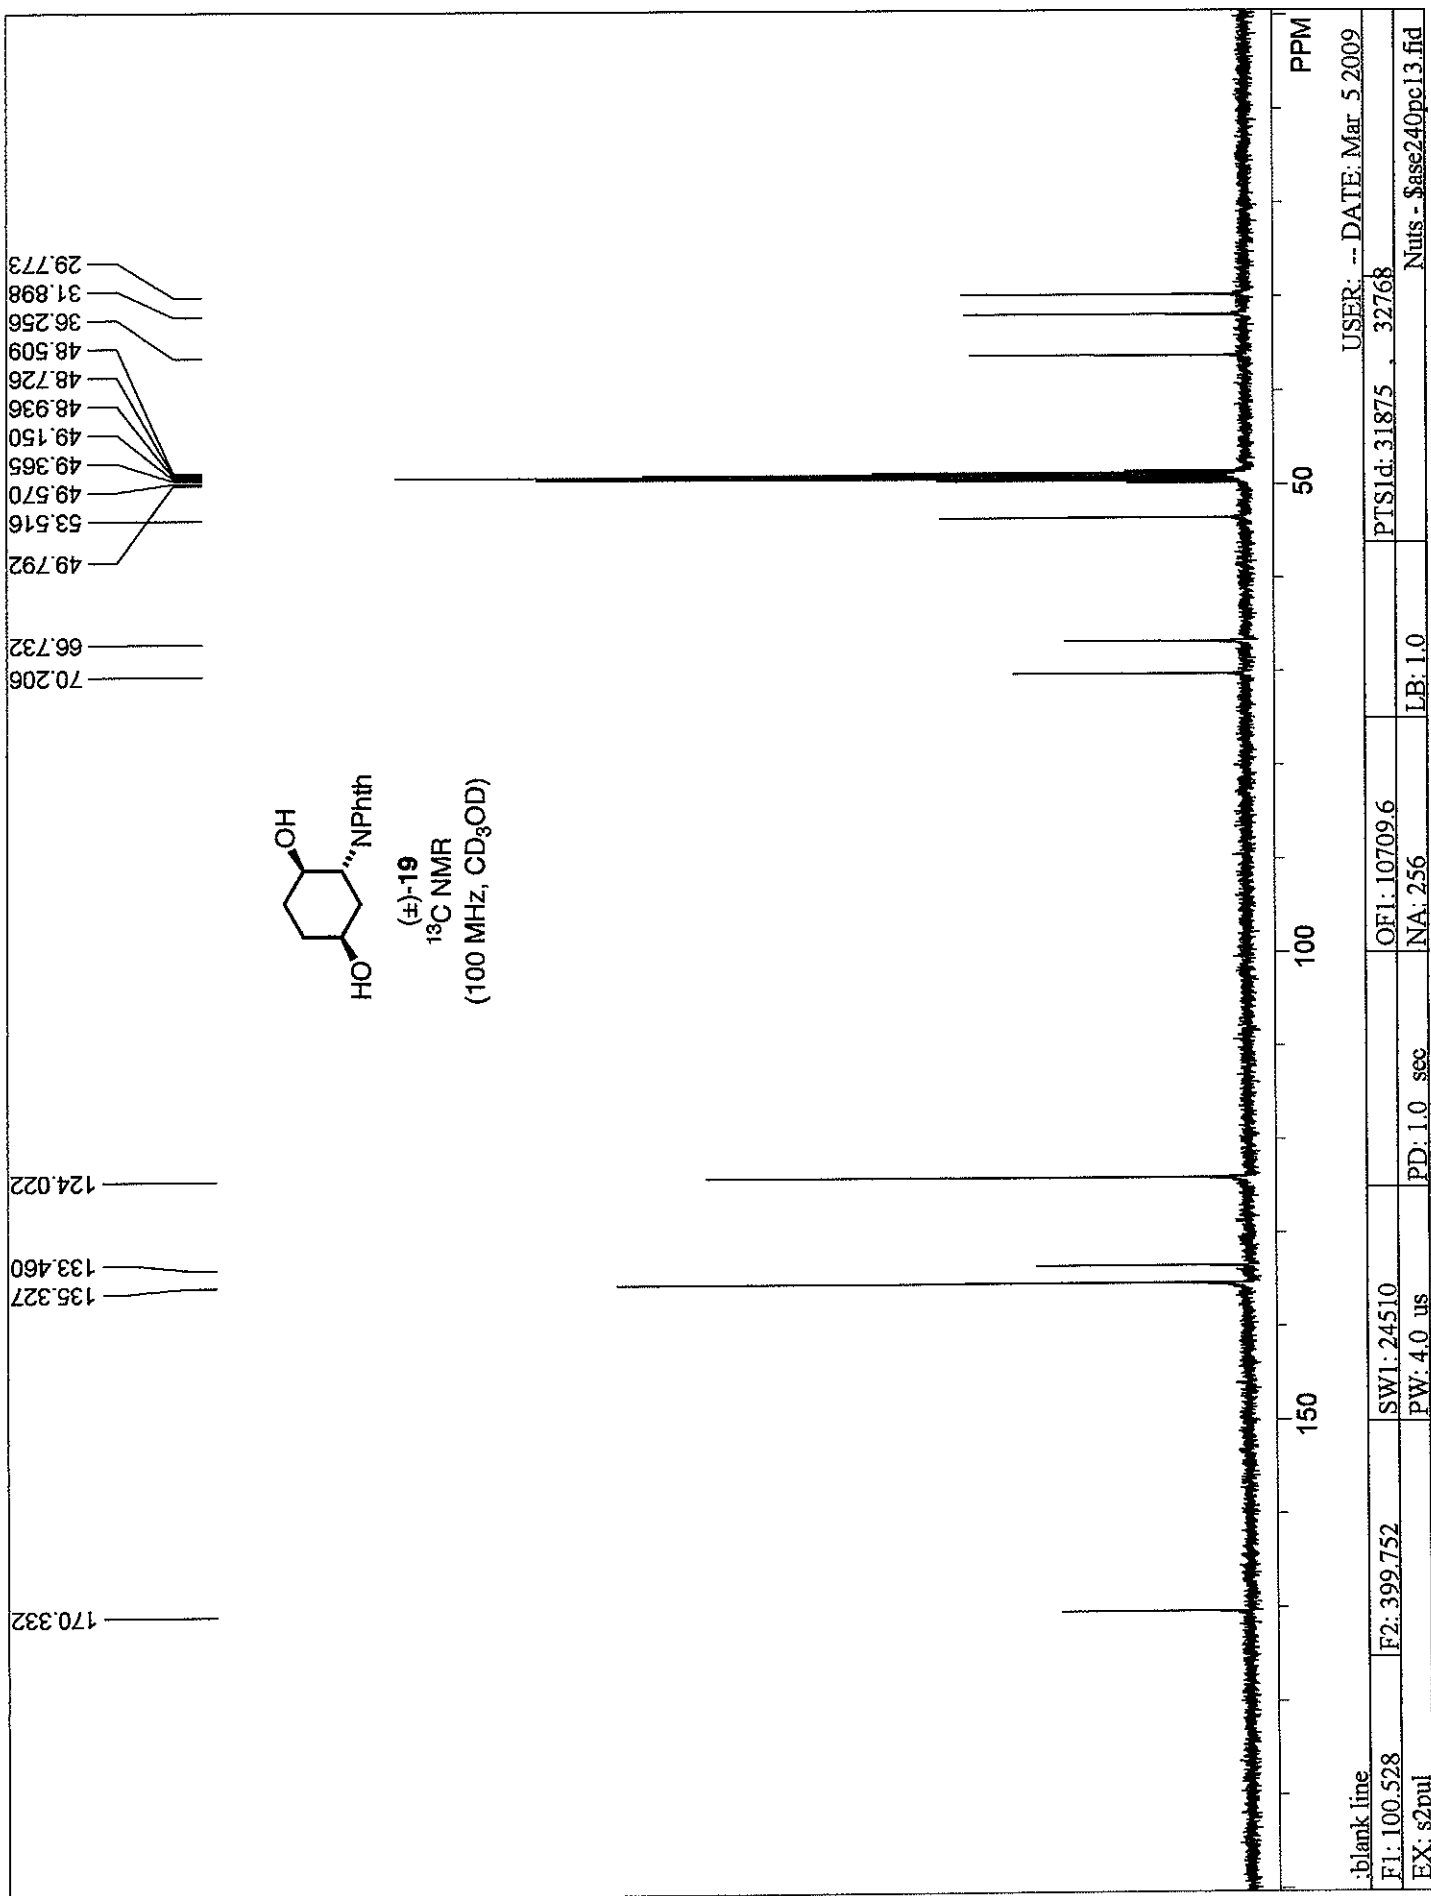

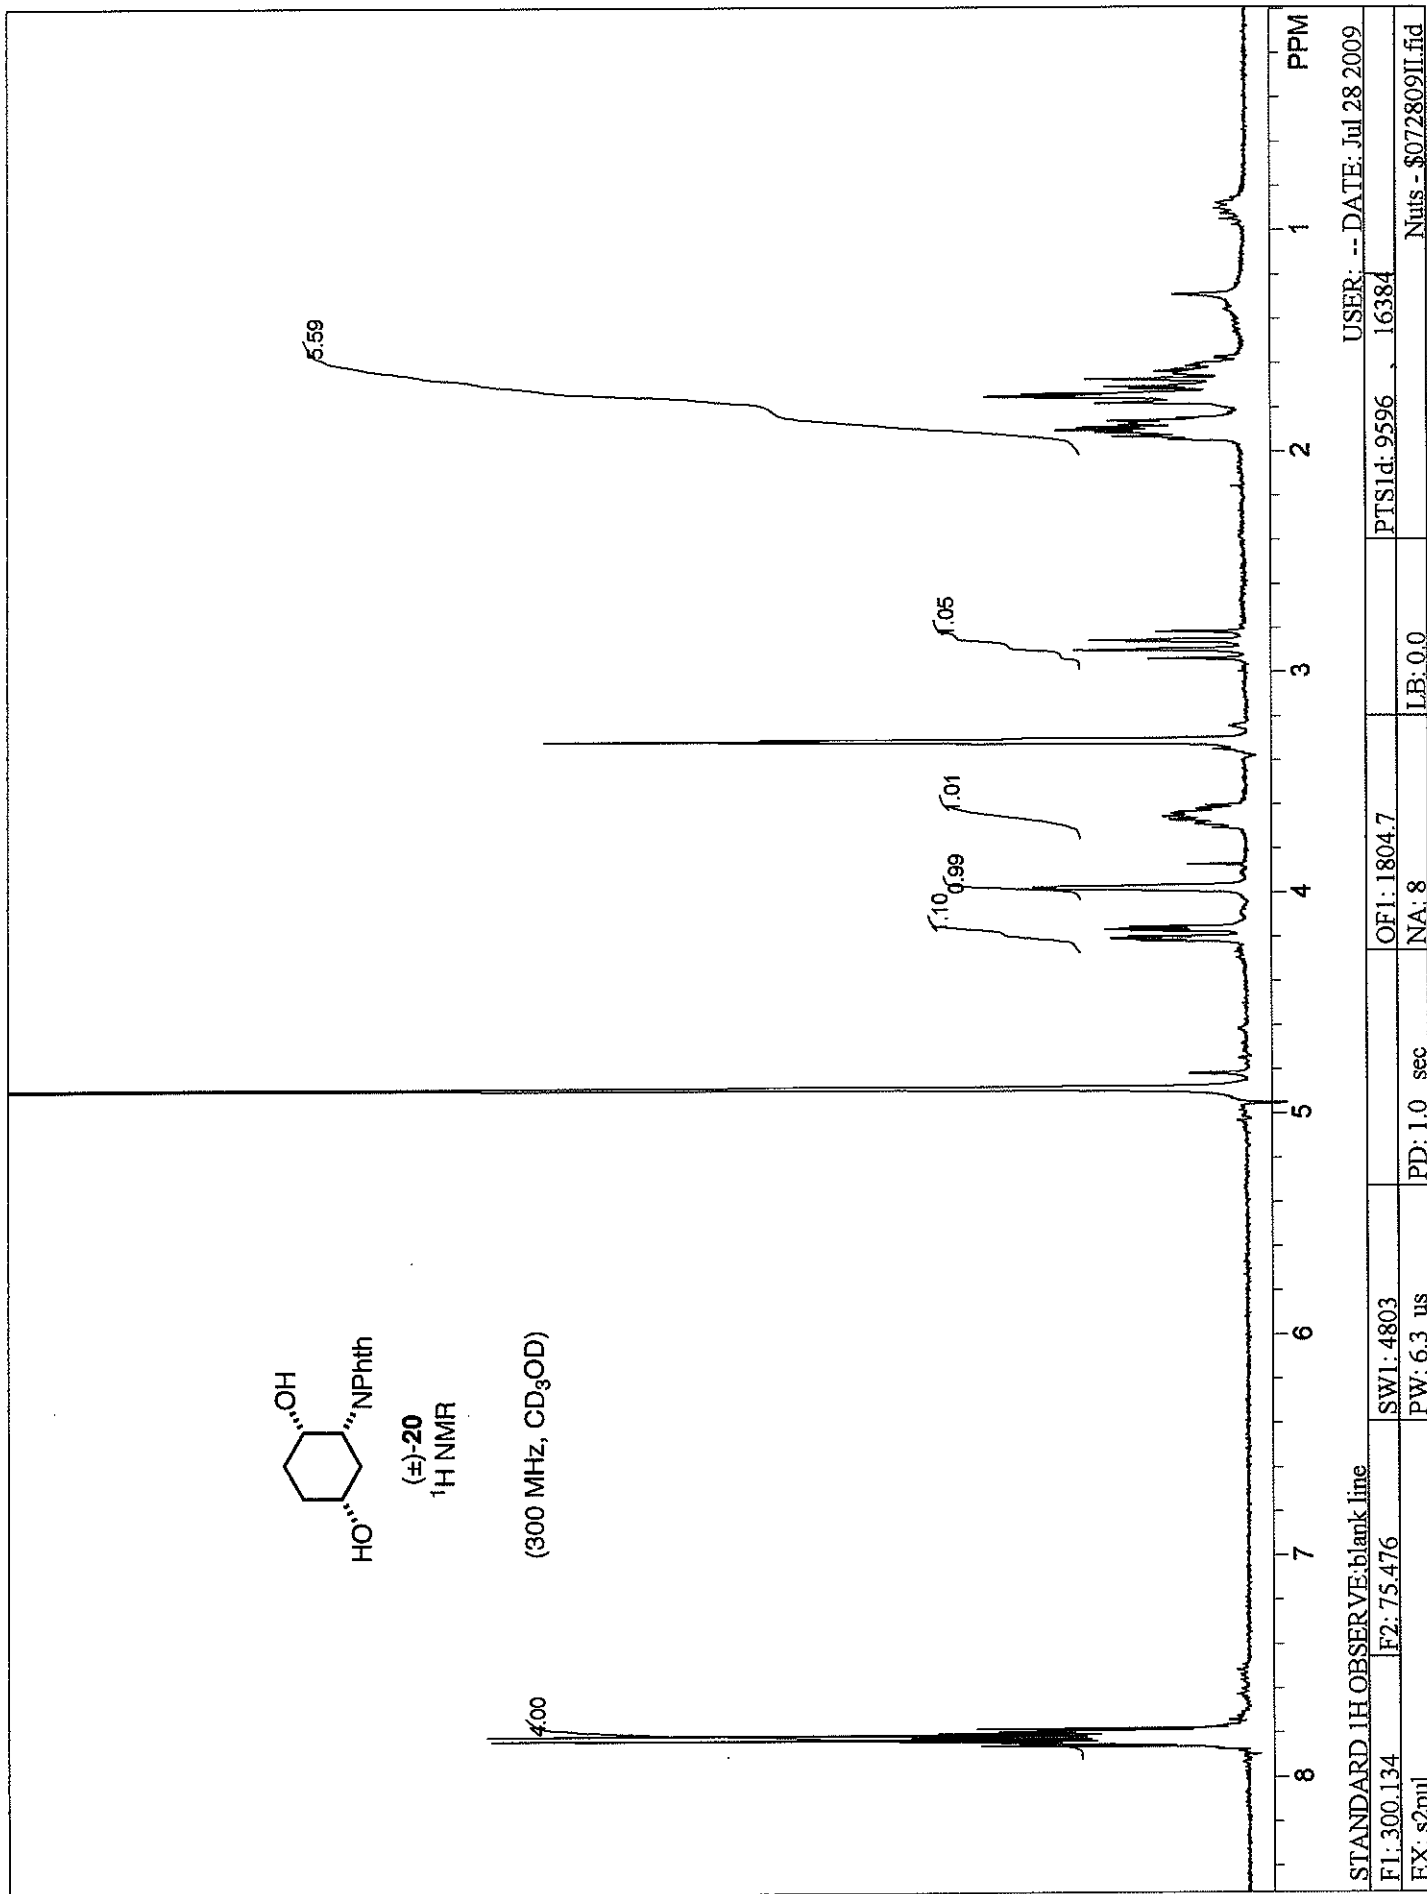

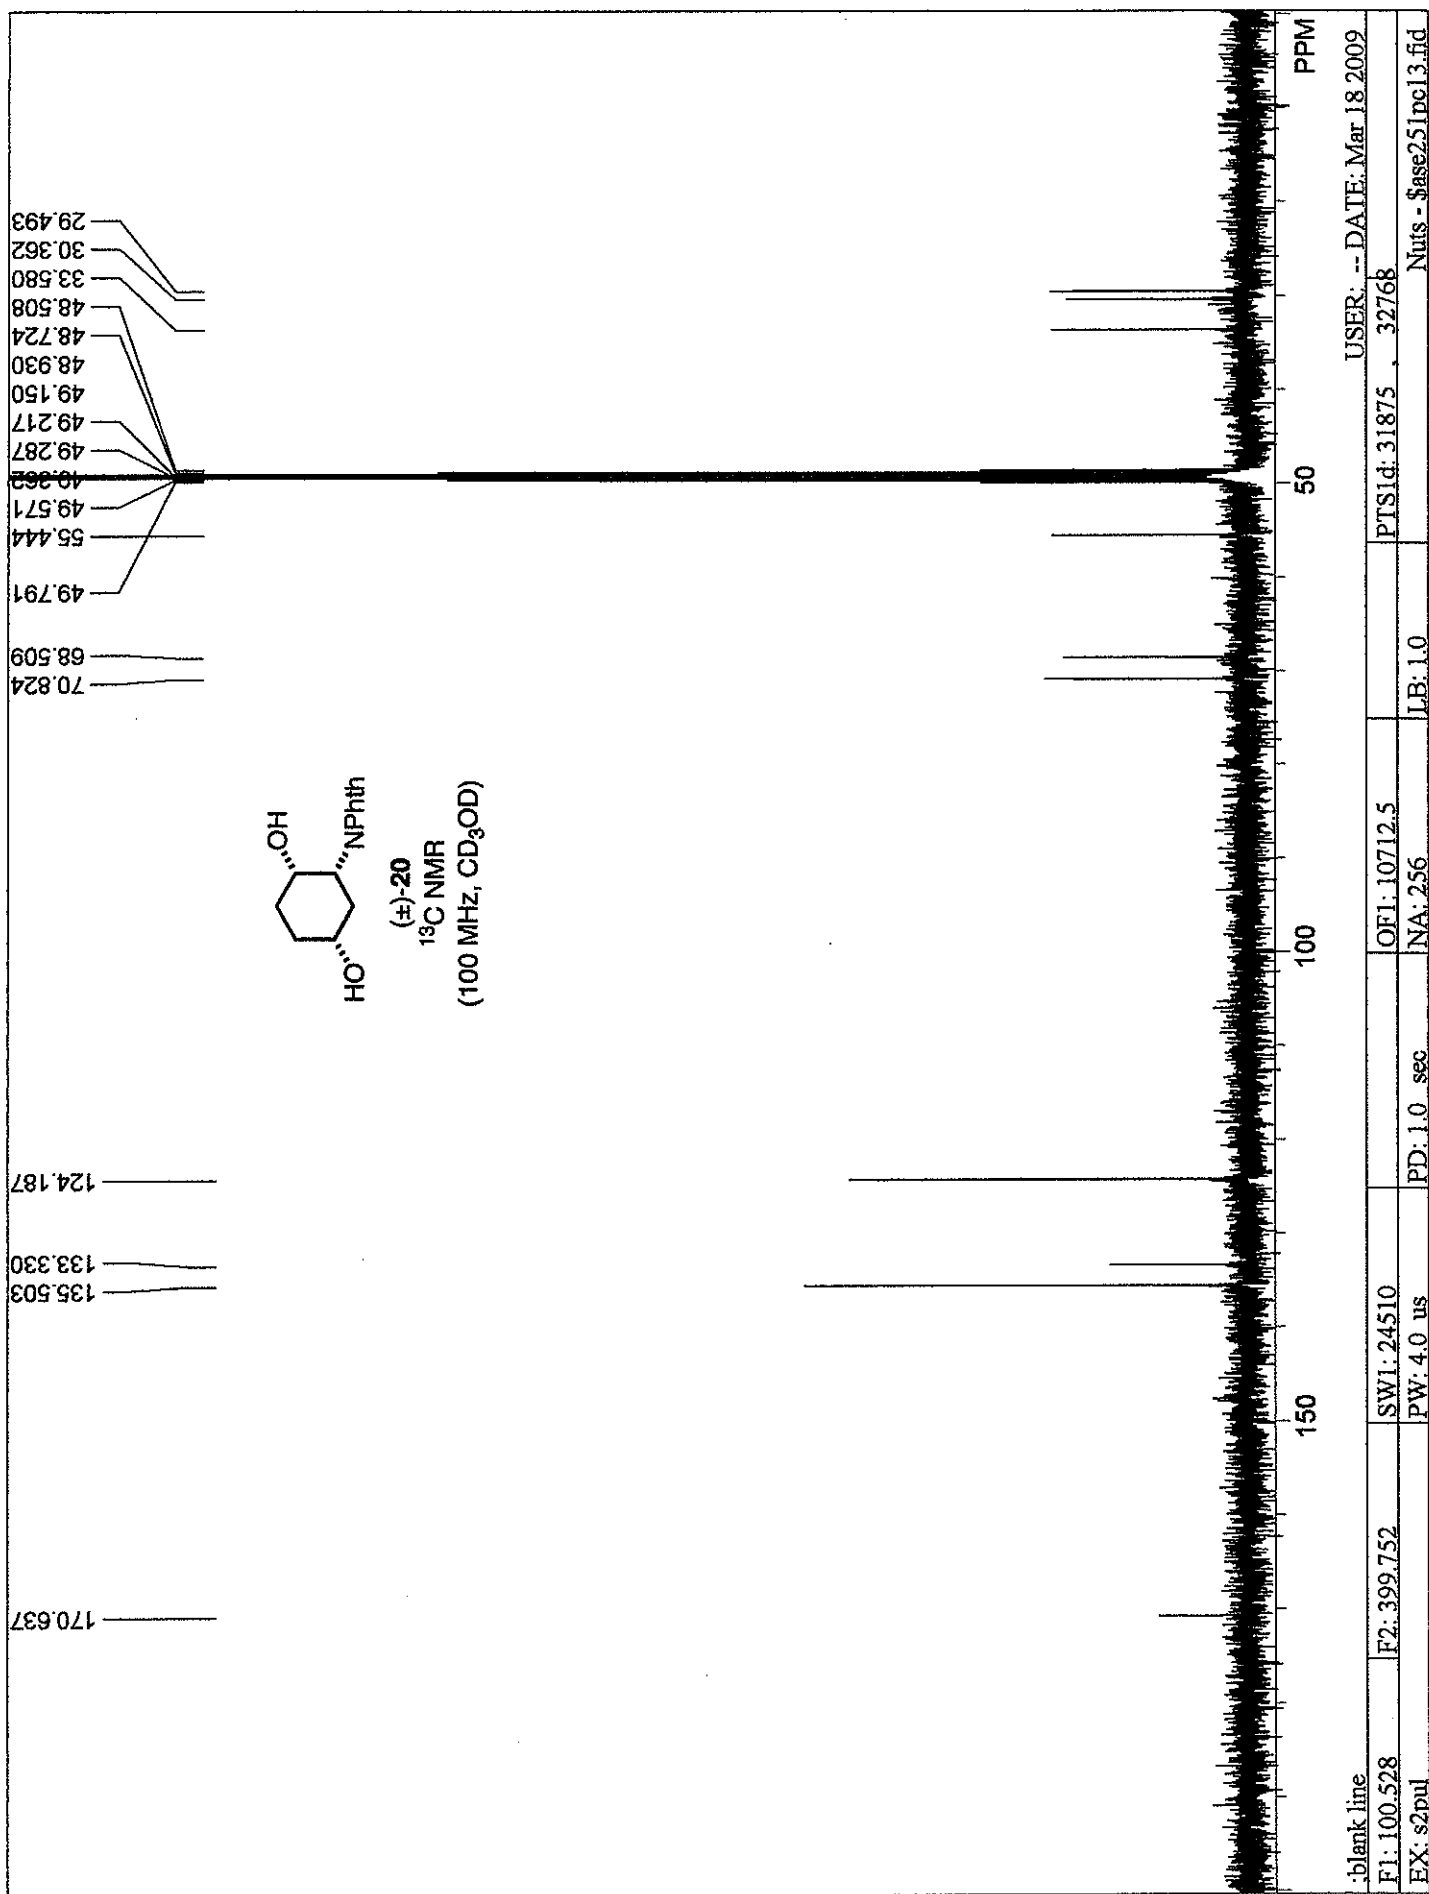

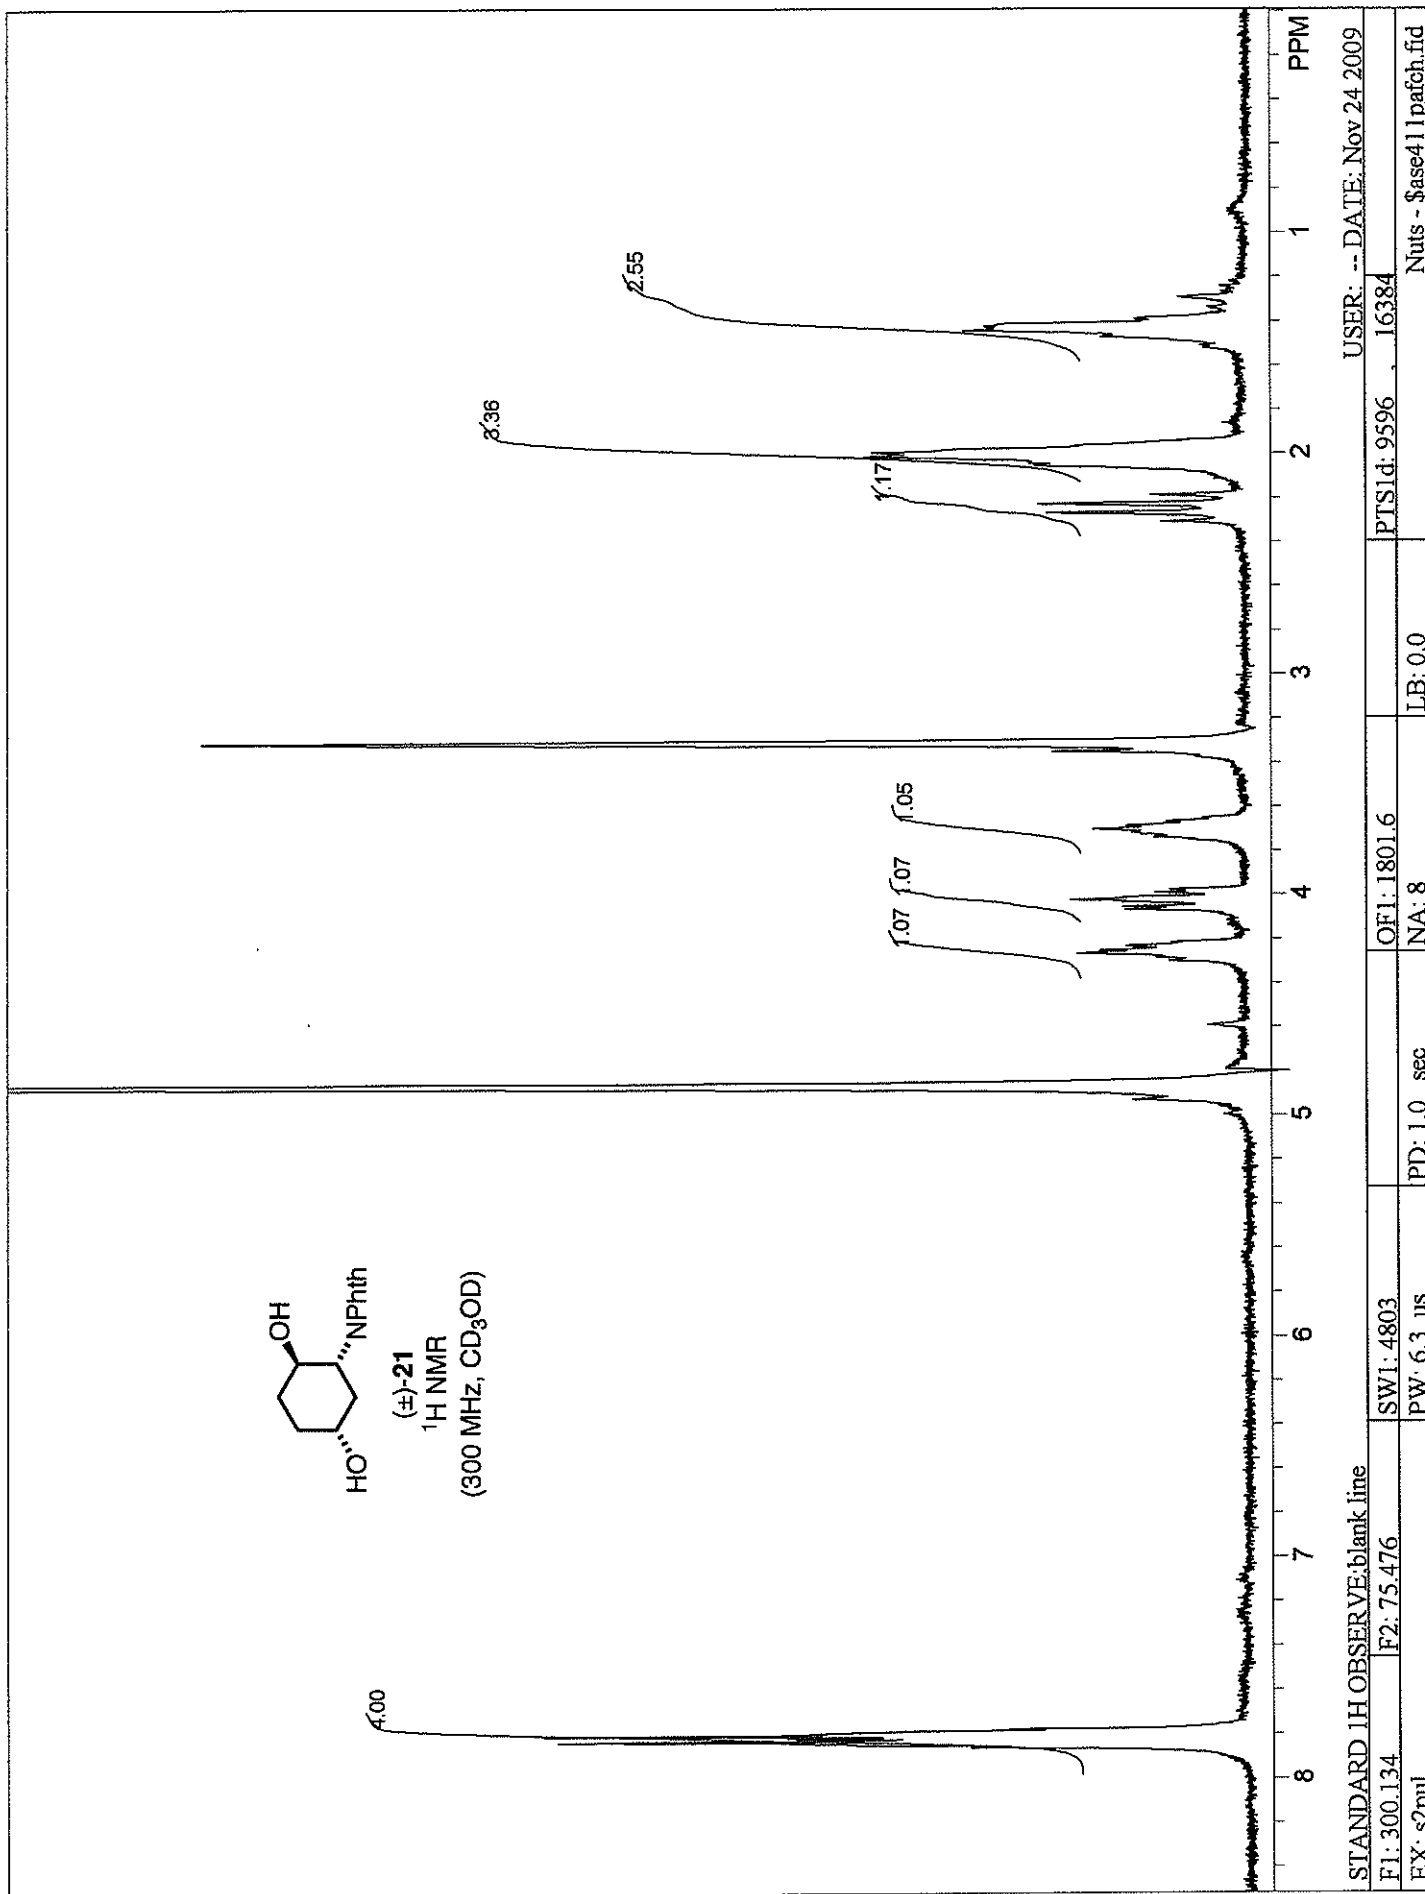

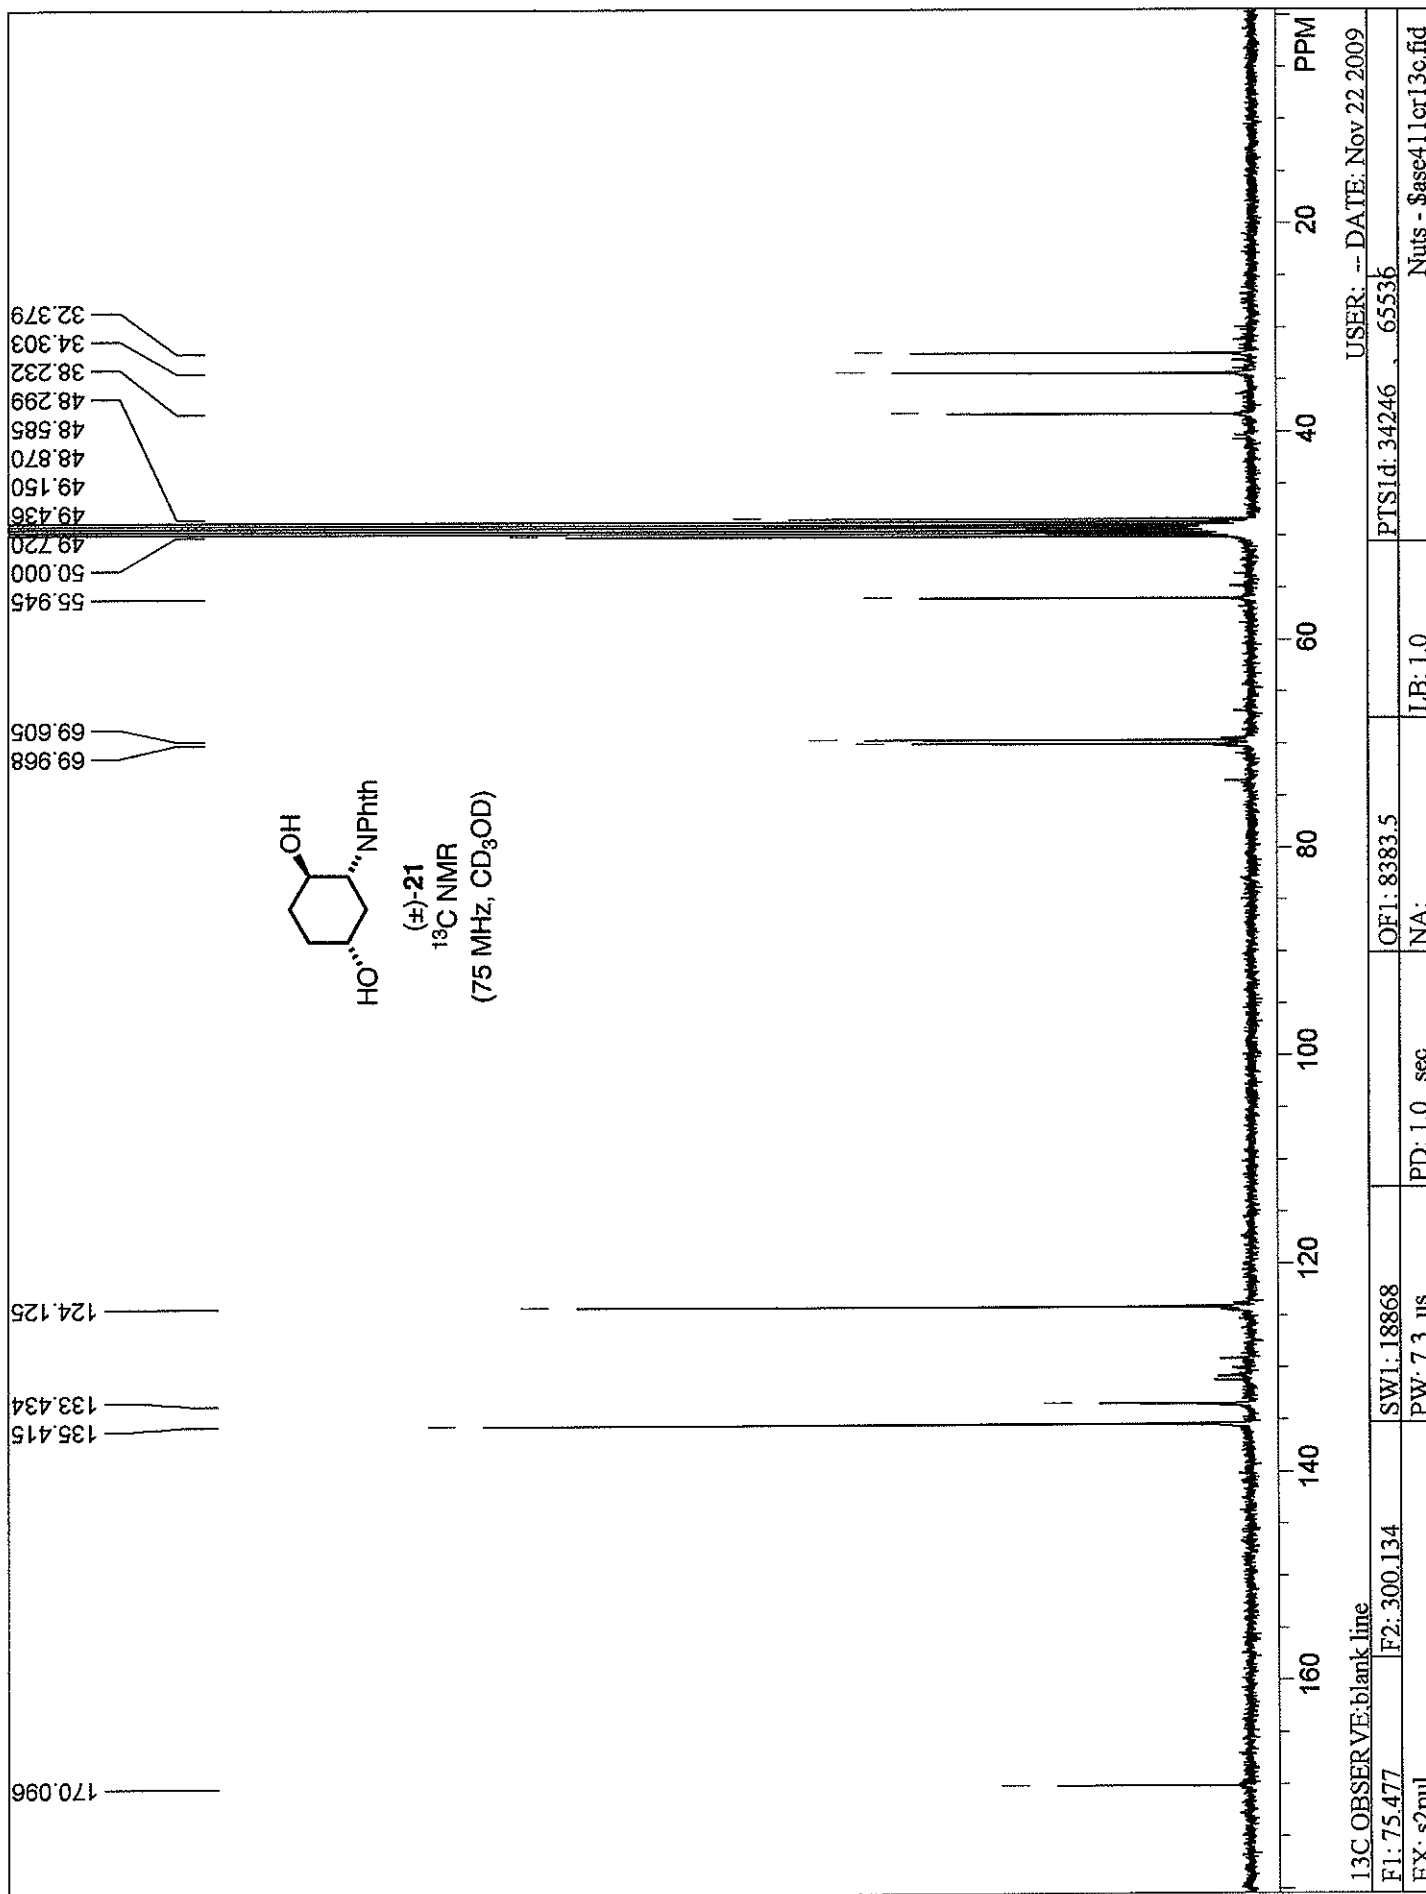

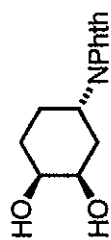

(±)-**22**

<sup>1</sup>H NMR

(400 MHz, CD<sub>3</sub>OD)

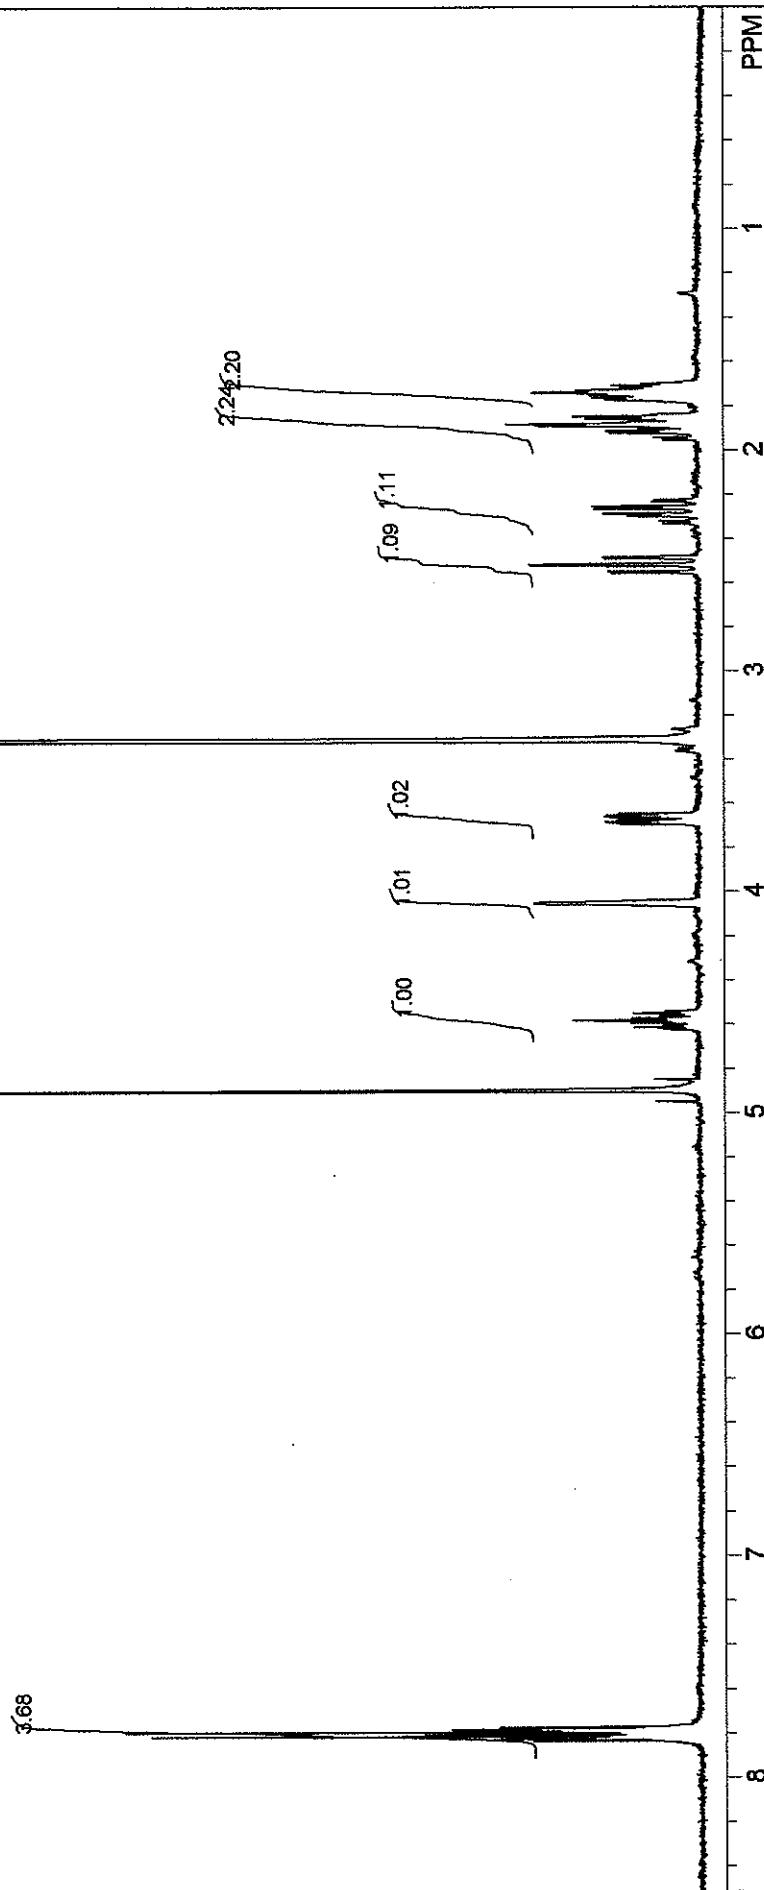

|             |             |                            |                      |
|-------------|-------------|----------------------------|----------------------|
| .blank line |             | USER: -- DATE: Jan 25 2009 |                      |
| F1: 399.753 | F2: 100.527 | OF1: 2401.7                | PTSID: 13132 16384   |
| EX: s2pul   | SW1: 6410   | NA: 8                      | LB: 0.0              |
|             | PW: 8.0 us  | PD: 1.0 sec                | Nuts - \$ase200p.fid |

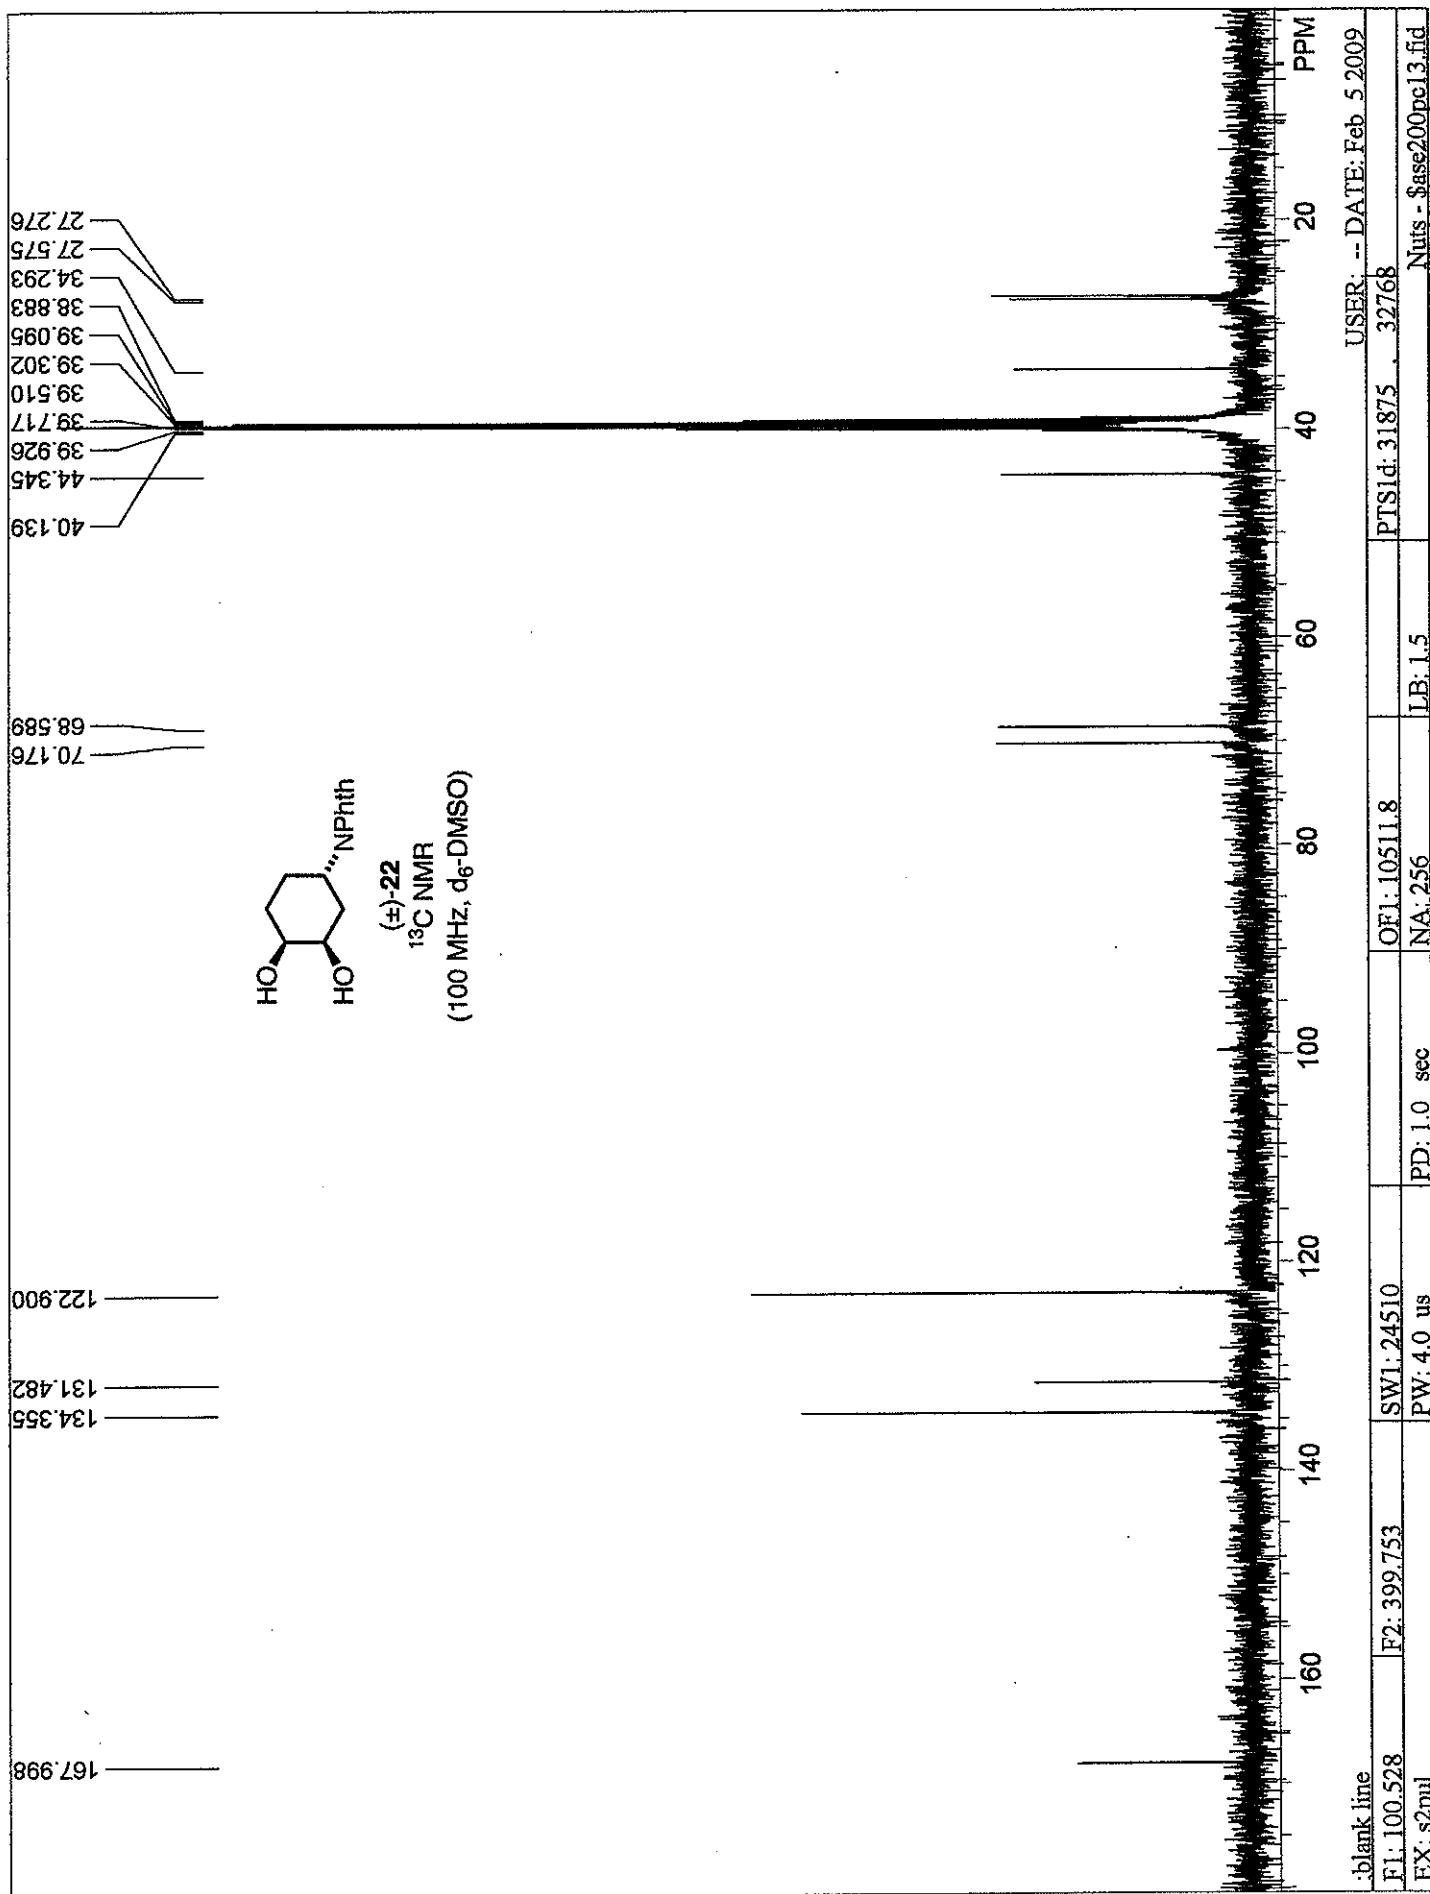

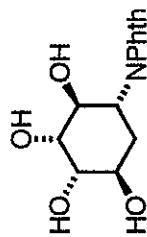

(±)-**23**

<sup>1</sup>H NMR

(400 MHz, CD<sub>3</sub>OD)

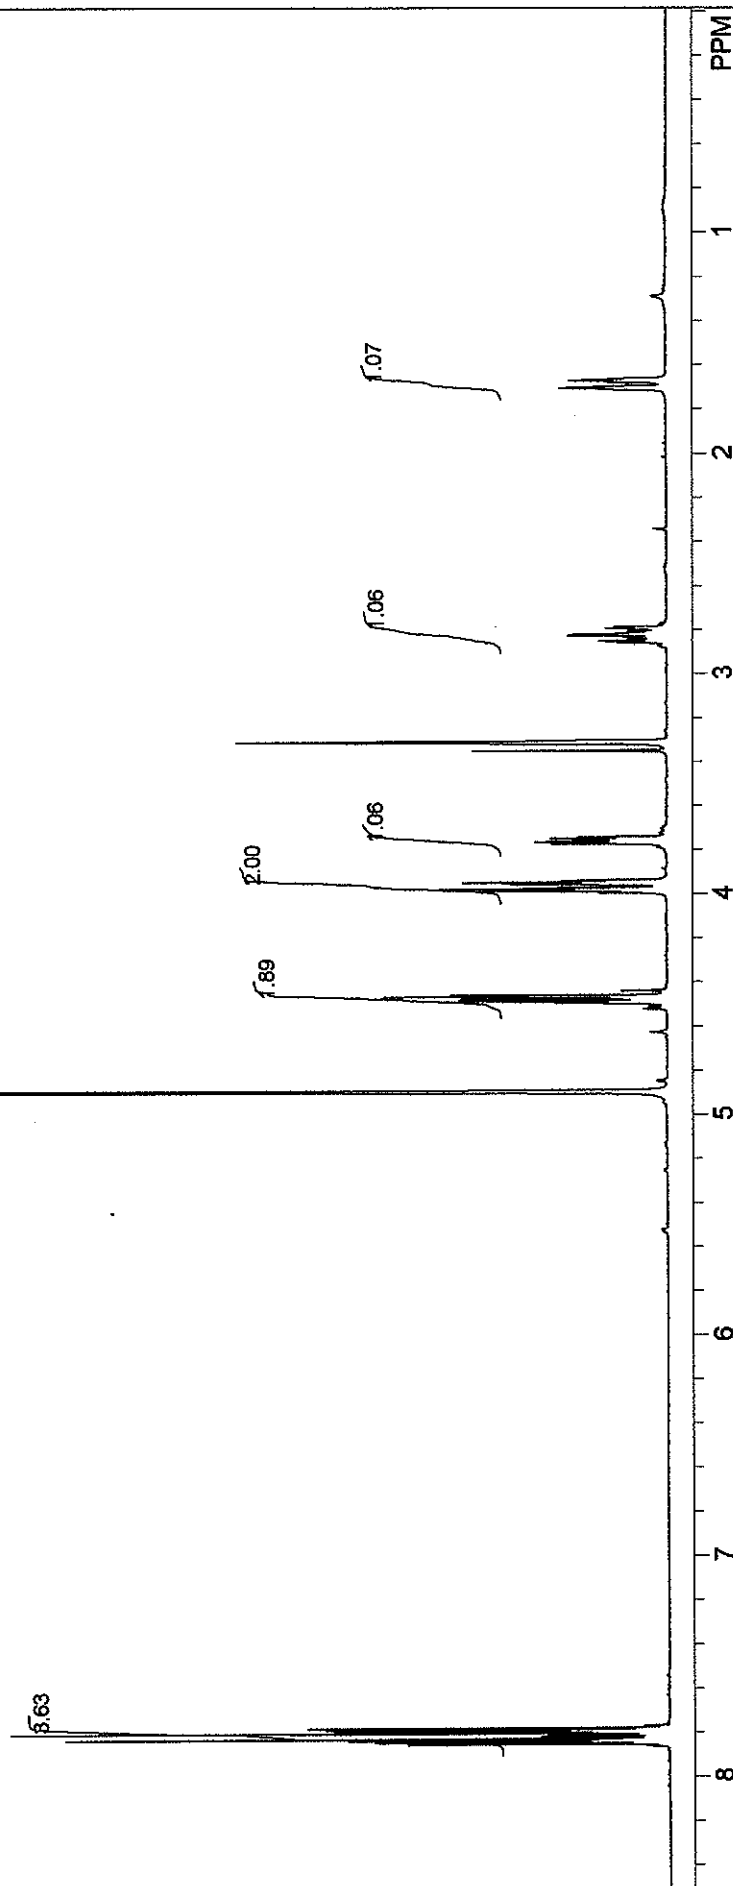

|             |                           |
|-------------|---------------------------|
| .blank line | USER: -- DATE: Sep 6 2008 |
| F1: 399.751 | PTS1d: 13132 16384        |
| EX: s2pul   | LB: 0.0                   |
| F2: 100.526 | NA: 8                     |
| SW1: 6410   | PD: 1.0 sec               |
| PW: 8.0 us  | OF1: 826.6                |
|             | Nuts - \$ase149fid.fid    |



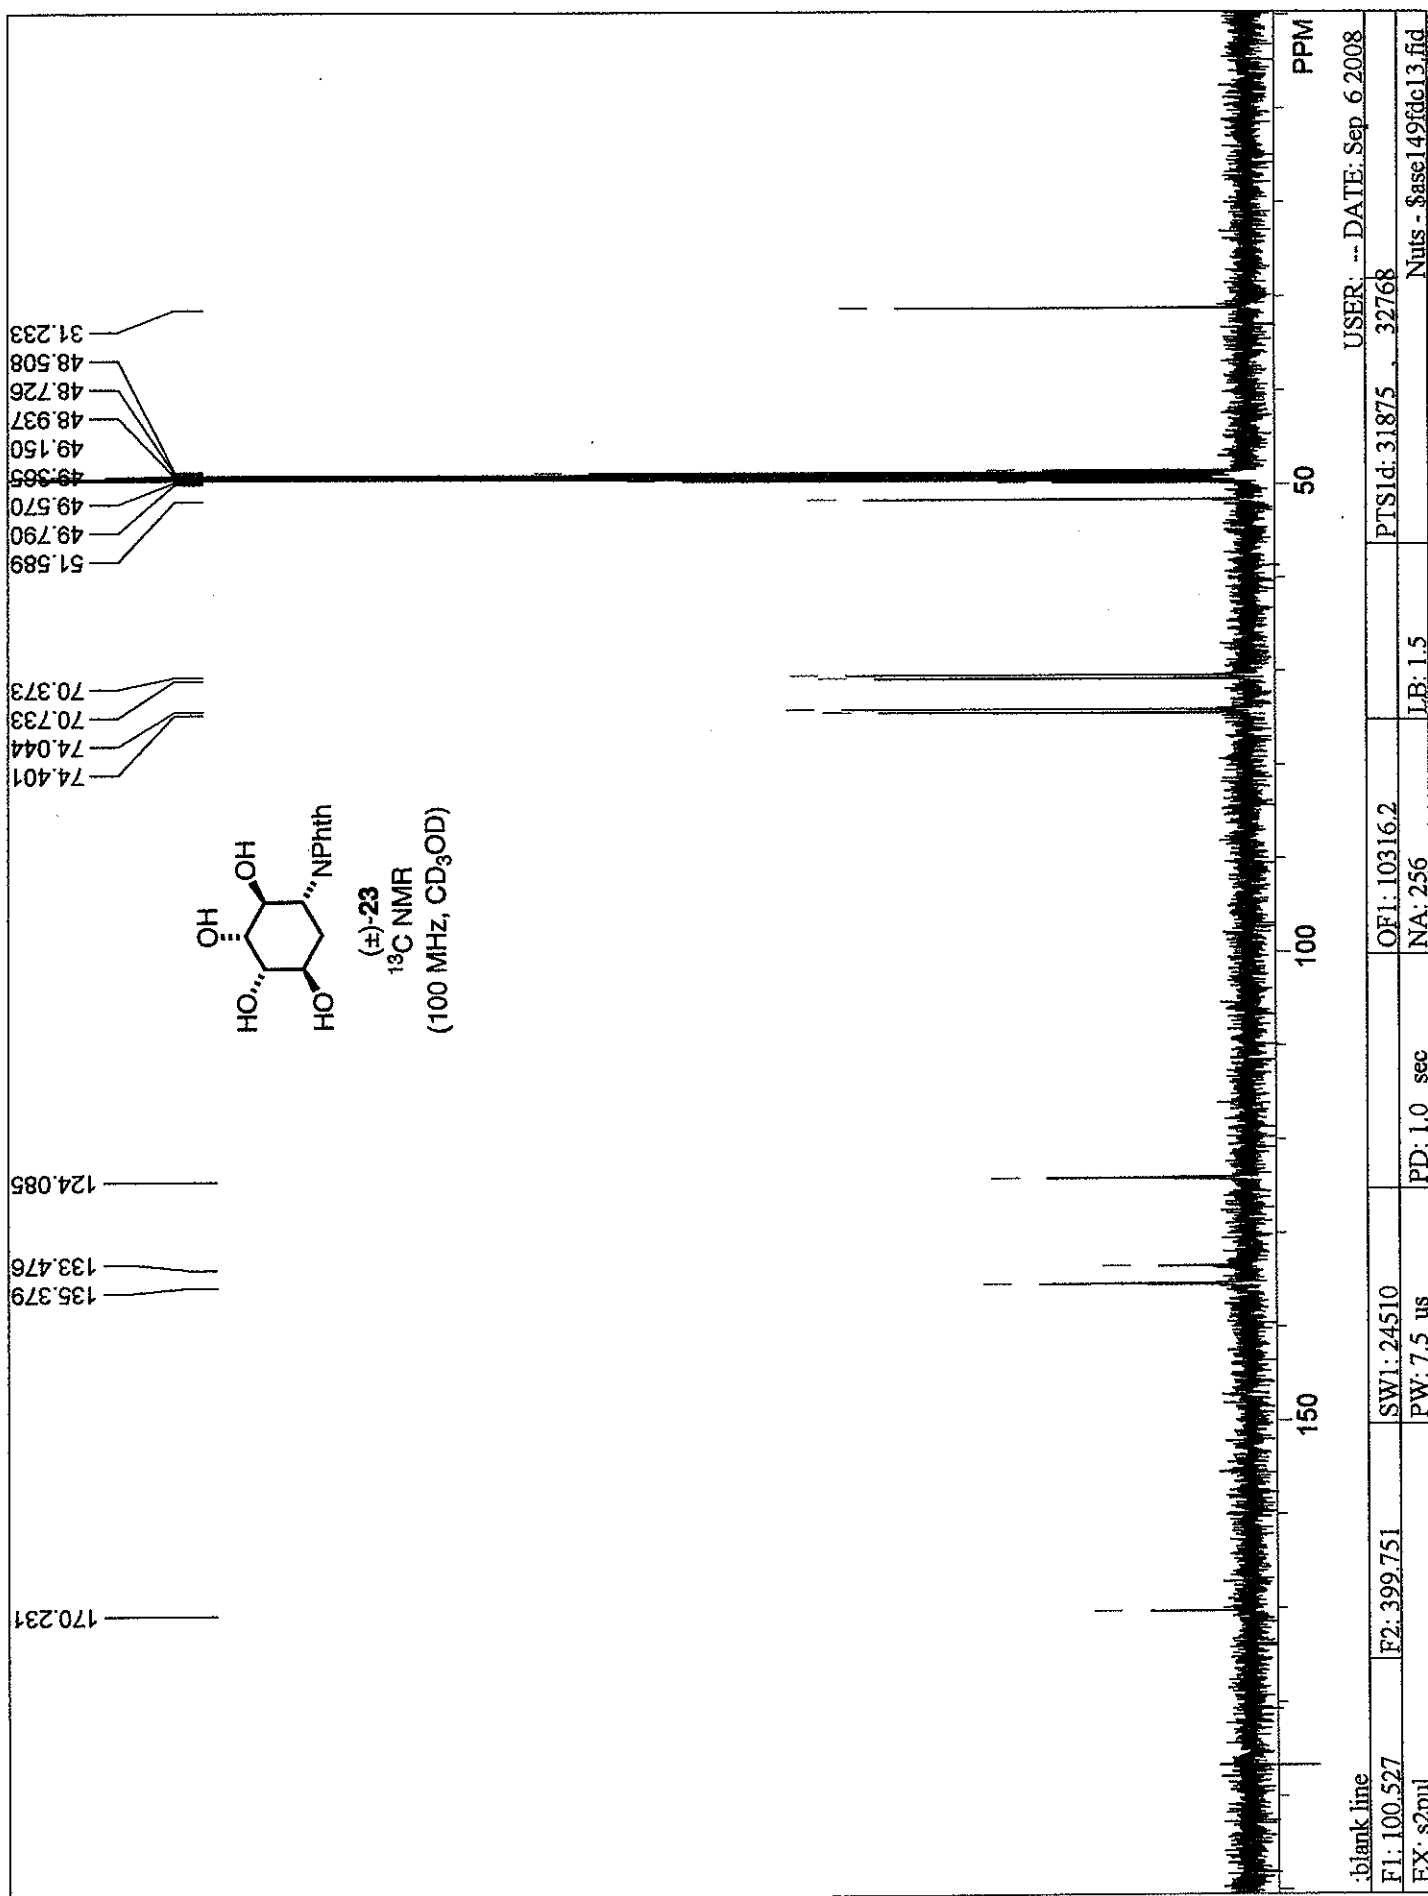

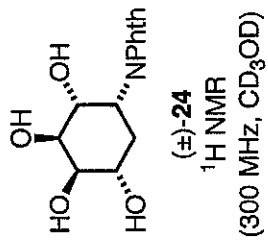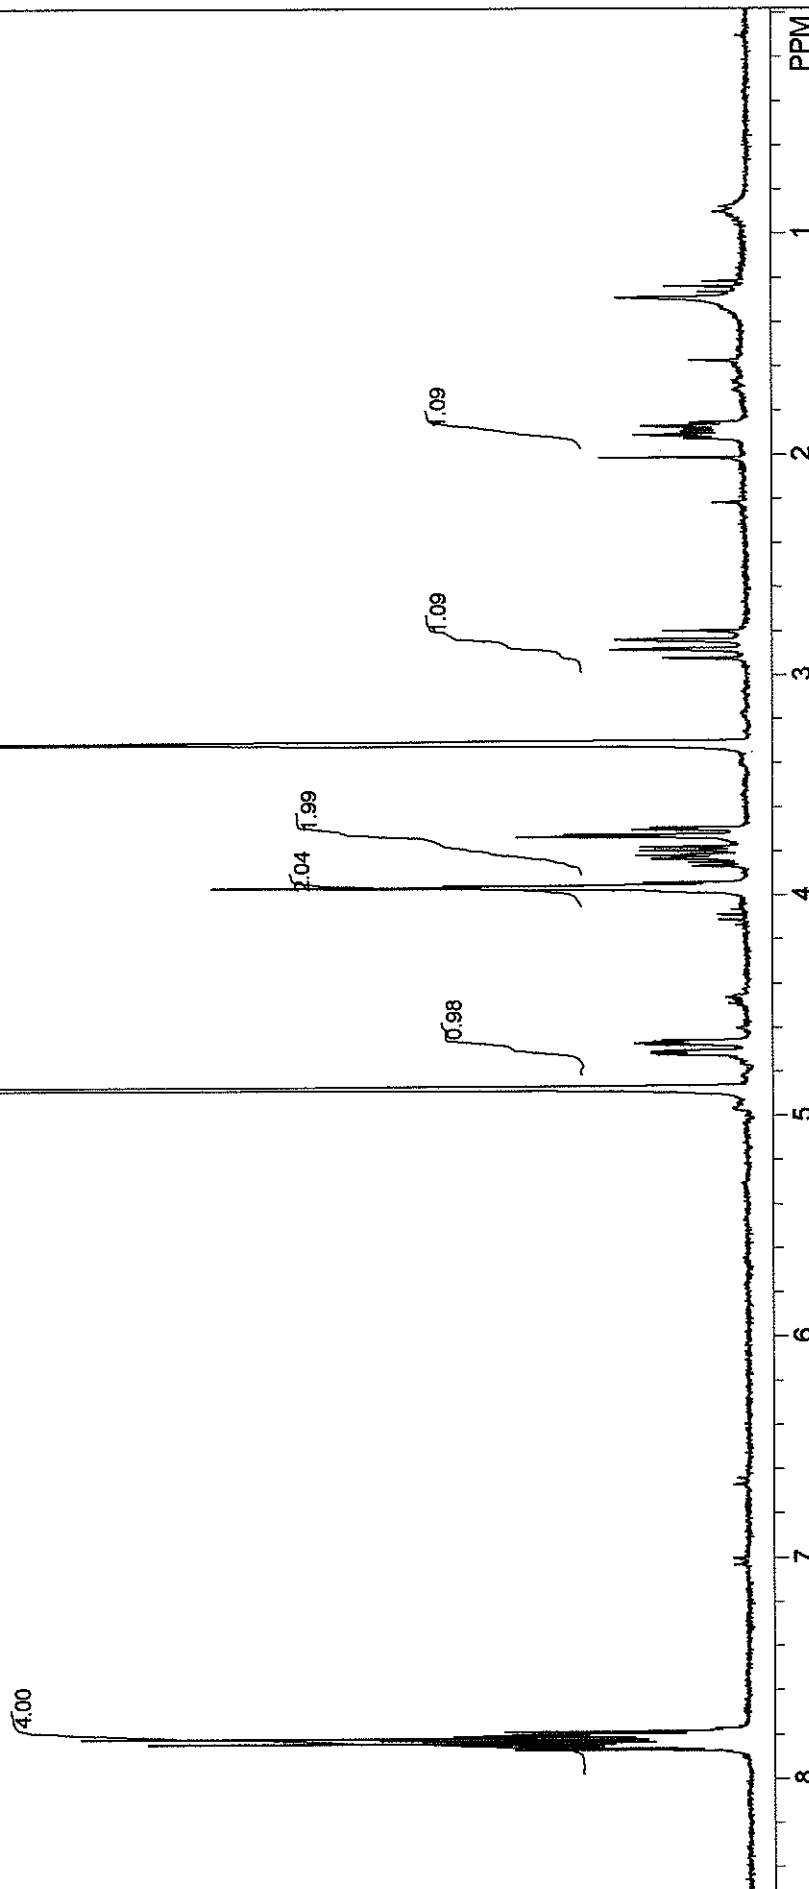

STANDARD 1H OBSERVE:blank line

|             |            |            |             |             |         |                             |
|-------------|------------|------------|-------------|-------------|---------|-----------------------------|
| FI: 300.134 | F2: 75.476 | SW1: 4803  | OF1: 1802.8 | PTS1d: 9596 | 16384   | USER: --- DATE: Oct.14.2009 |
| EX: s2pul   |            | PW: 6.3 us | PD: 1.0 sec | NA: 8       | LB: 0.0 | Nuts - \$ase380pp.fid       |

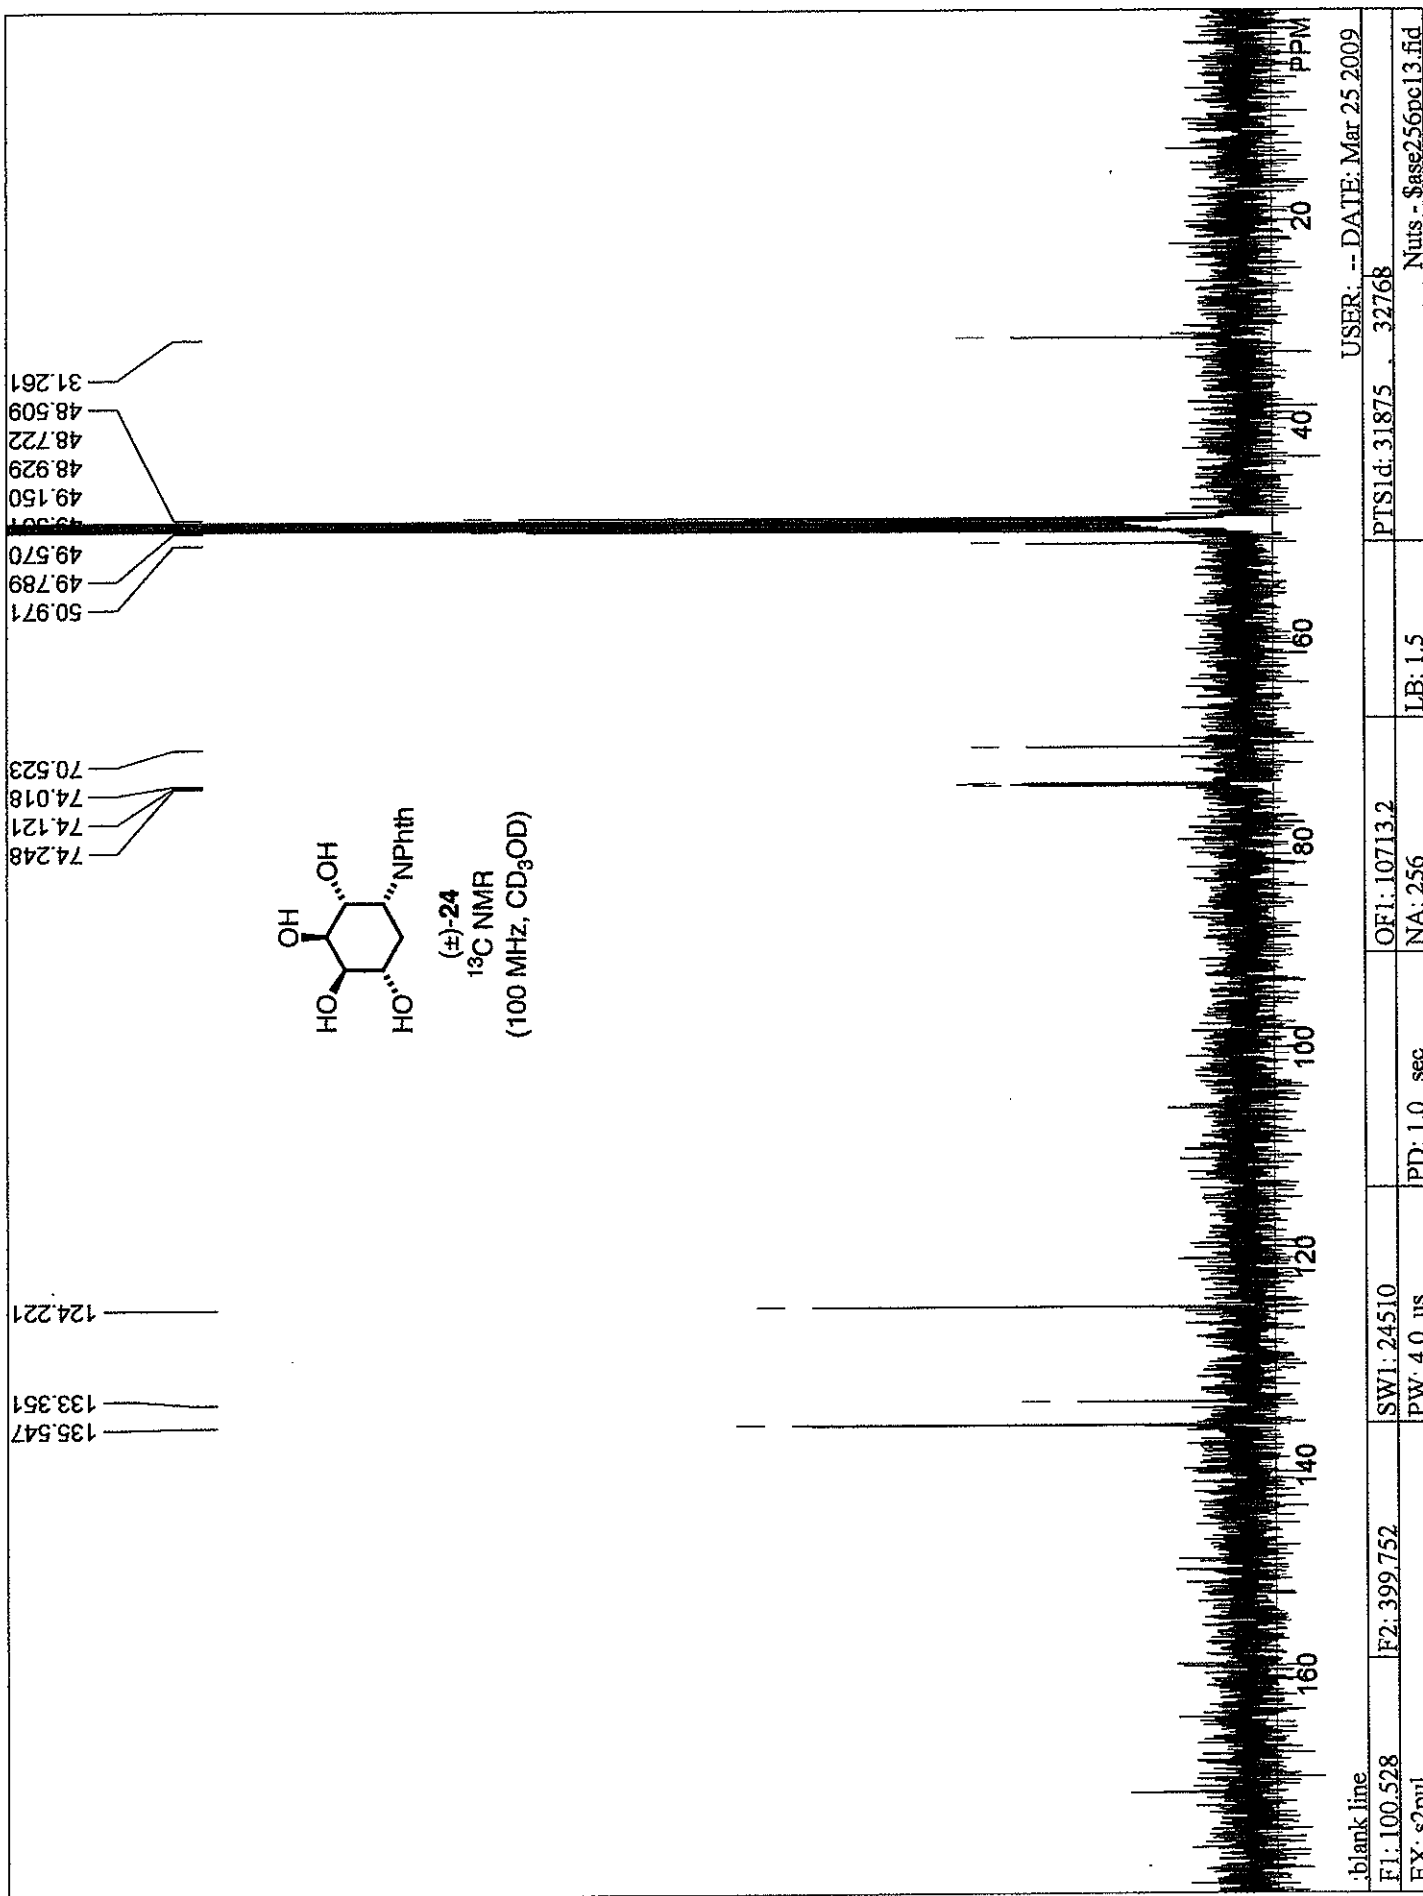

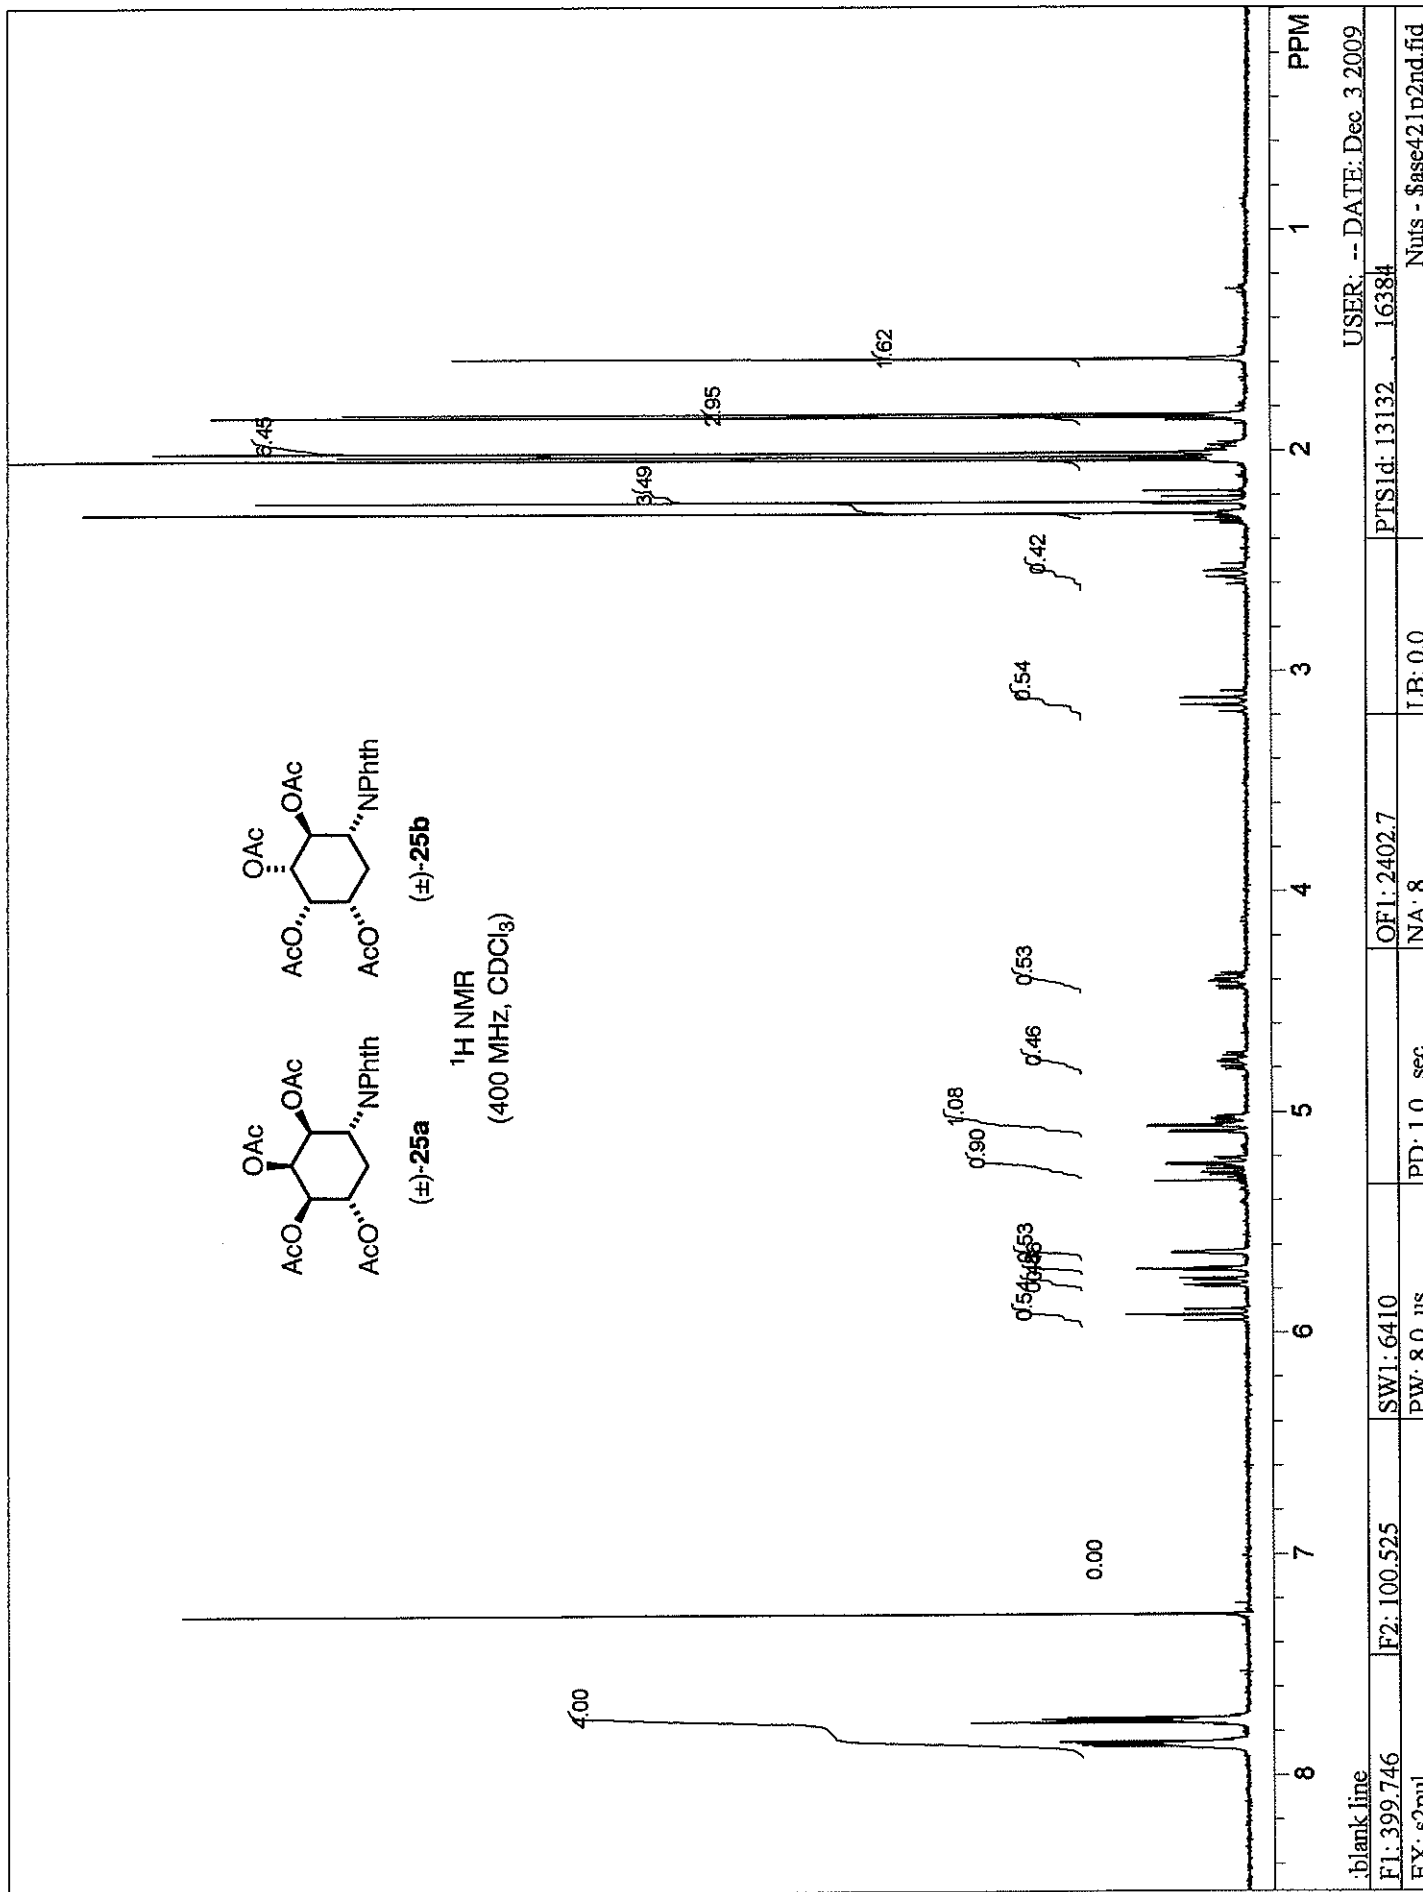

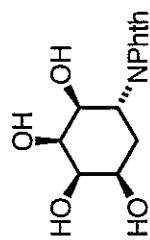

(±)-**26**  
1H NMR  
(300 MHz, d<sub>6</sub>-DMSO)

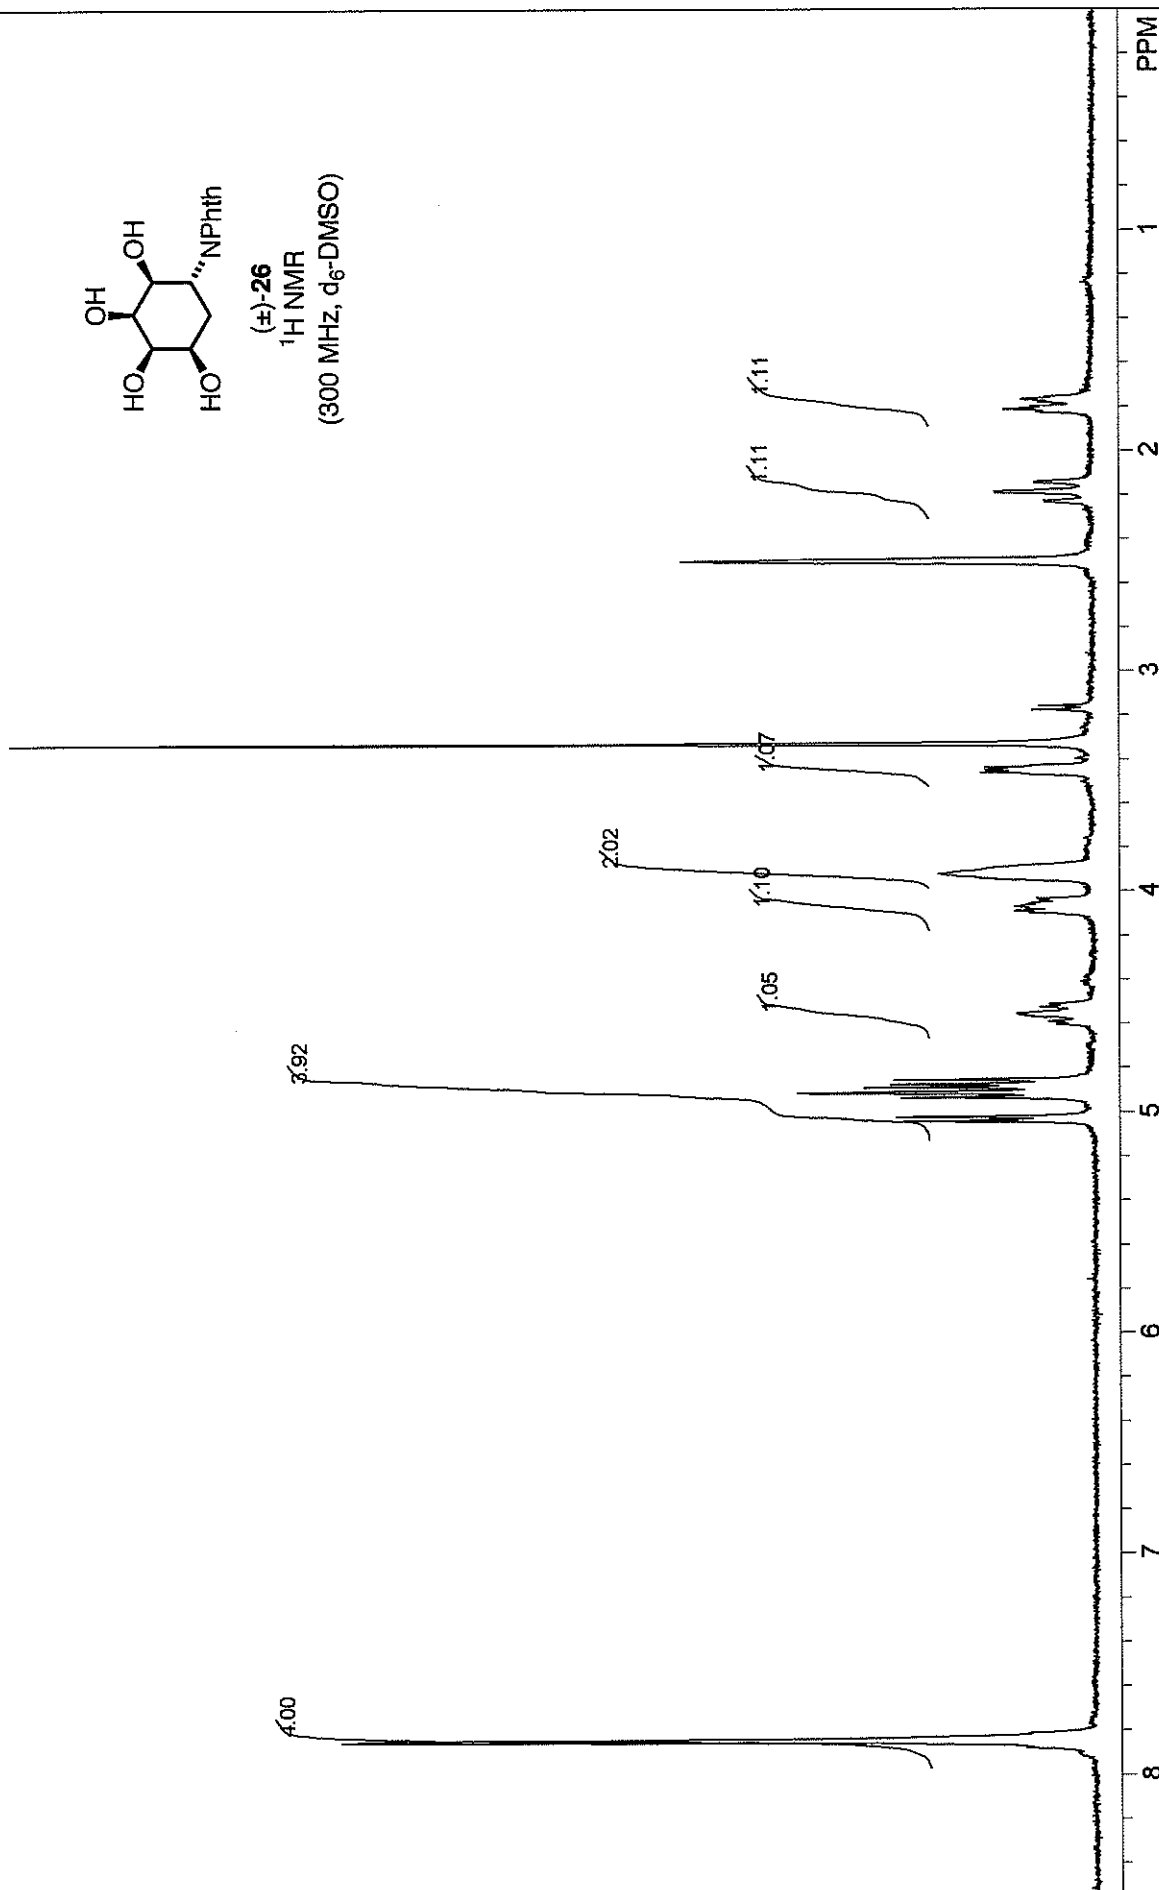

STANDARD 1H OBSERVE:blank line

F1: 300.134 F2: 75.476

SW1: 4803  
PW: 6.3 us

PD: 1.0 sec

OF1: 1805.1  
NA: 8

LB: 0.0

PTSId: 9596 I6384

USER: -- DATE: Feb. 5 2009

Nuts - \$ase212qfq.fid

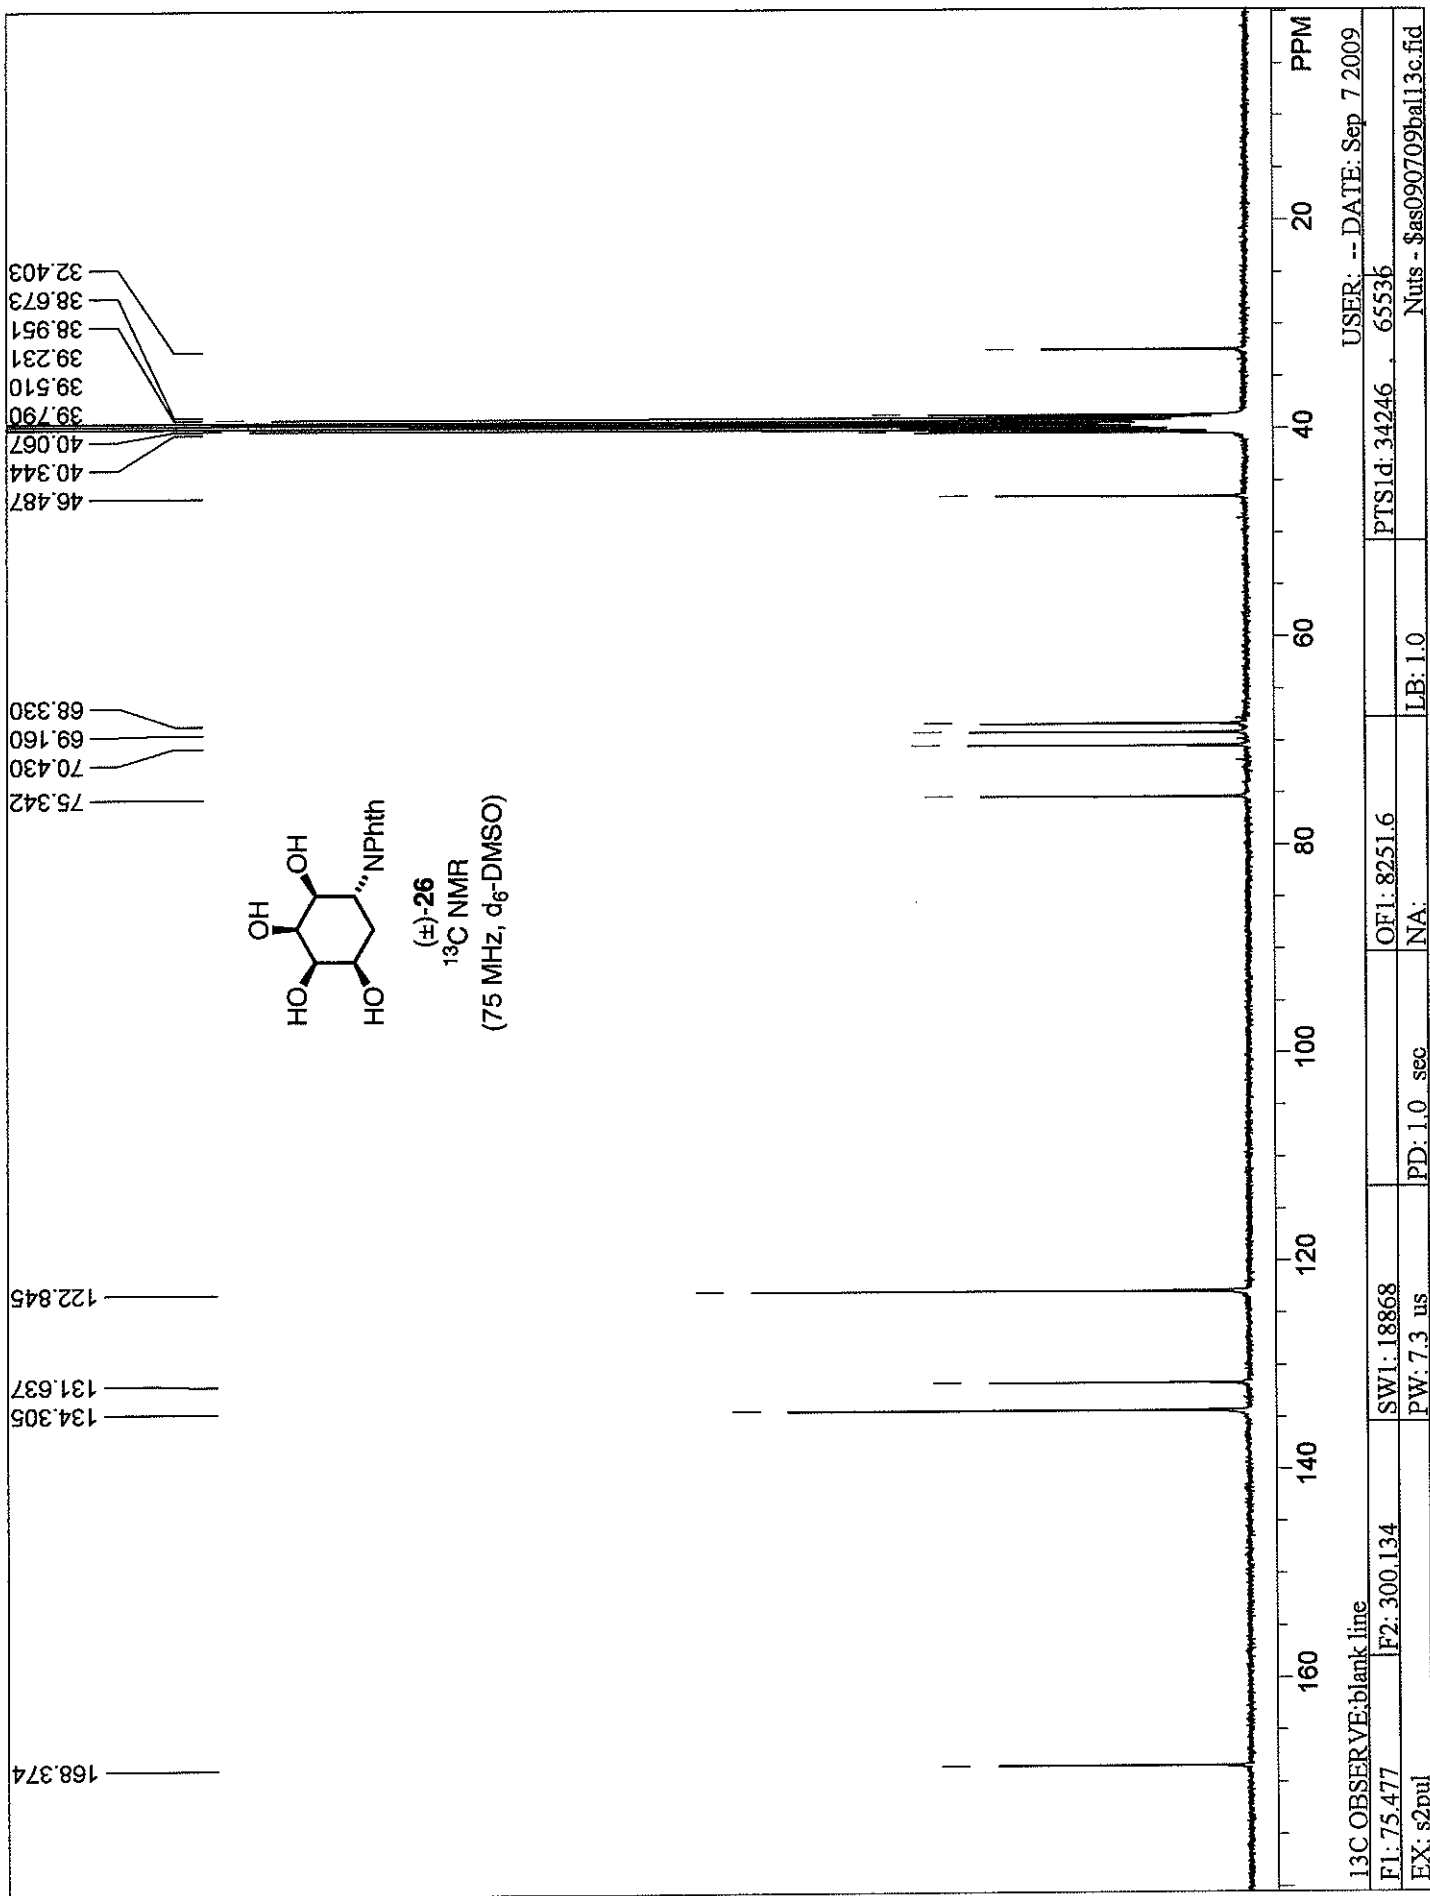

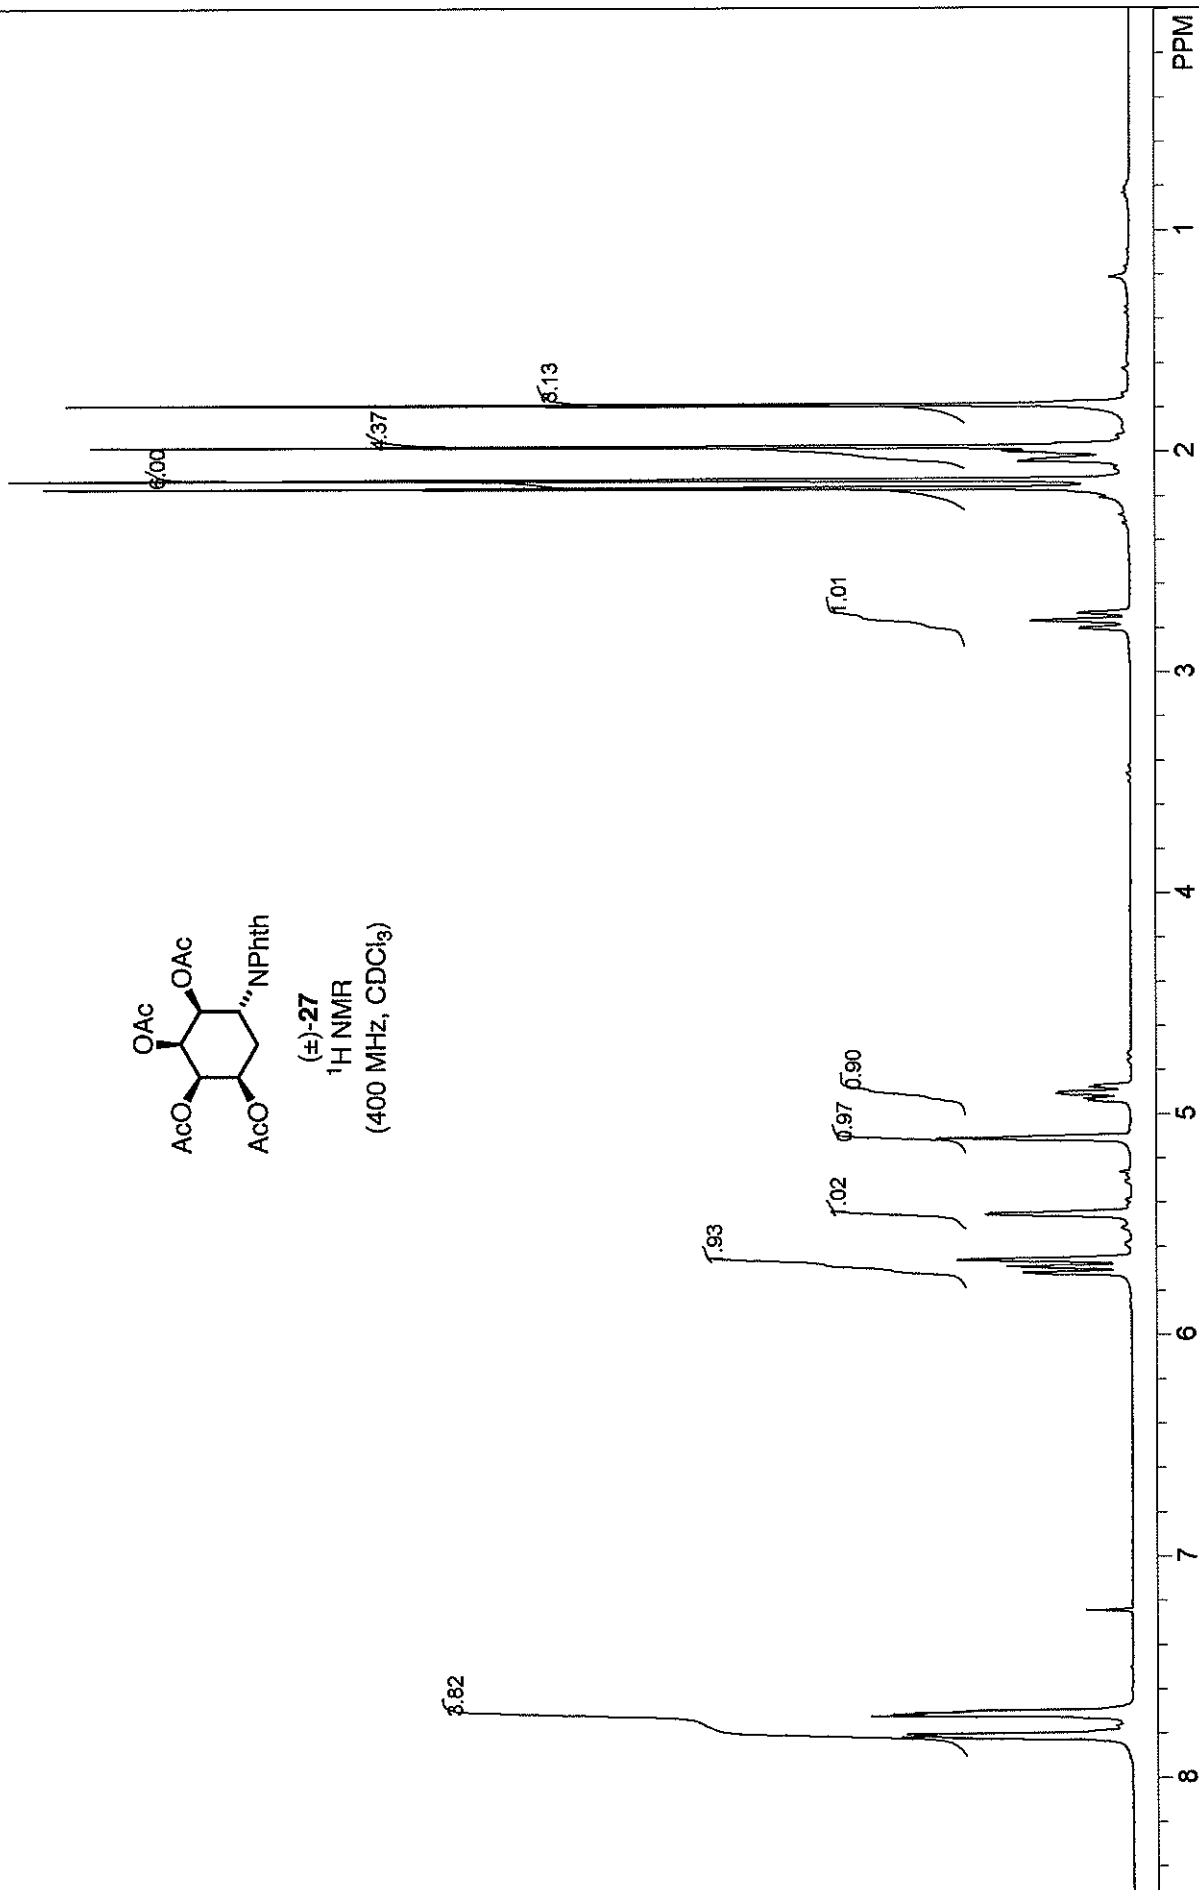

|             |                           |             |             |              |                       |
|-------------|---------------------------|-------------|-------------|--------------|-----------------------|
| .blank line | USER: -- DATE: Mar 3 2010 |             |             |              |                       |
| F1: 399.746 | F2: 100.525               | SW1: 6410   | OF1: 2393.0 | PTS1d: 13132 | 16384                 |
| EX: s2pul   | PW: 8.0 us                | PD: 1.0 sec | NA: 8       | LB: 0.0      | Nuts - \$ase472lp.fid |

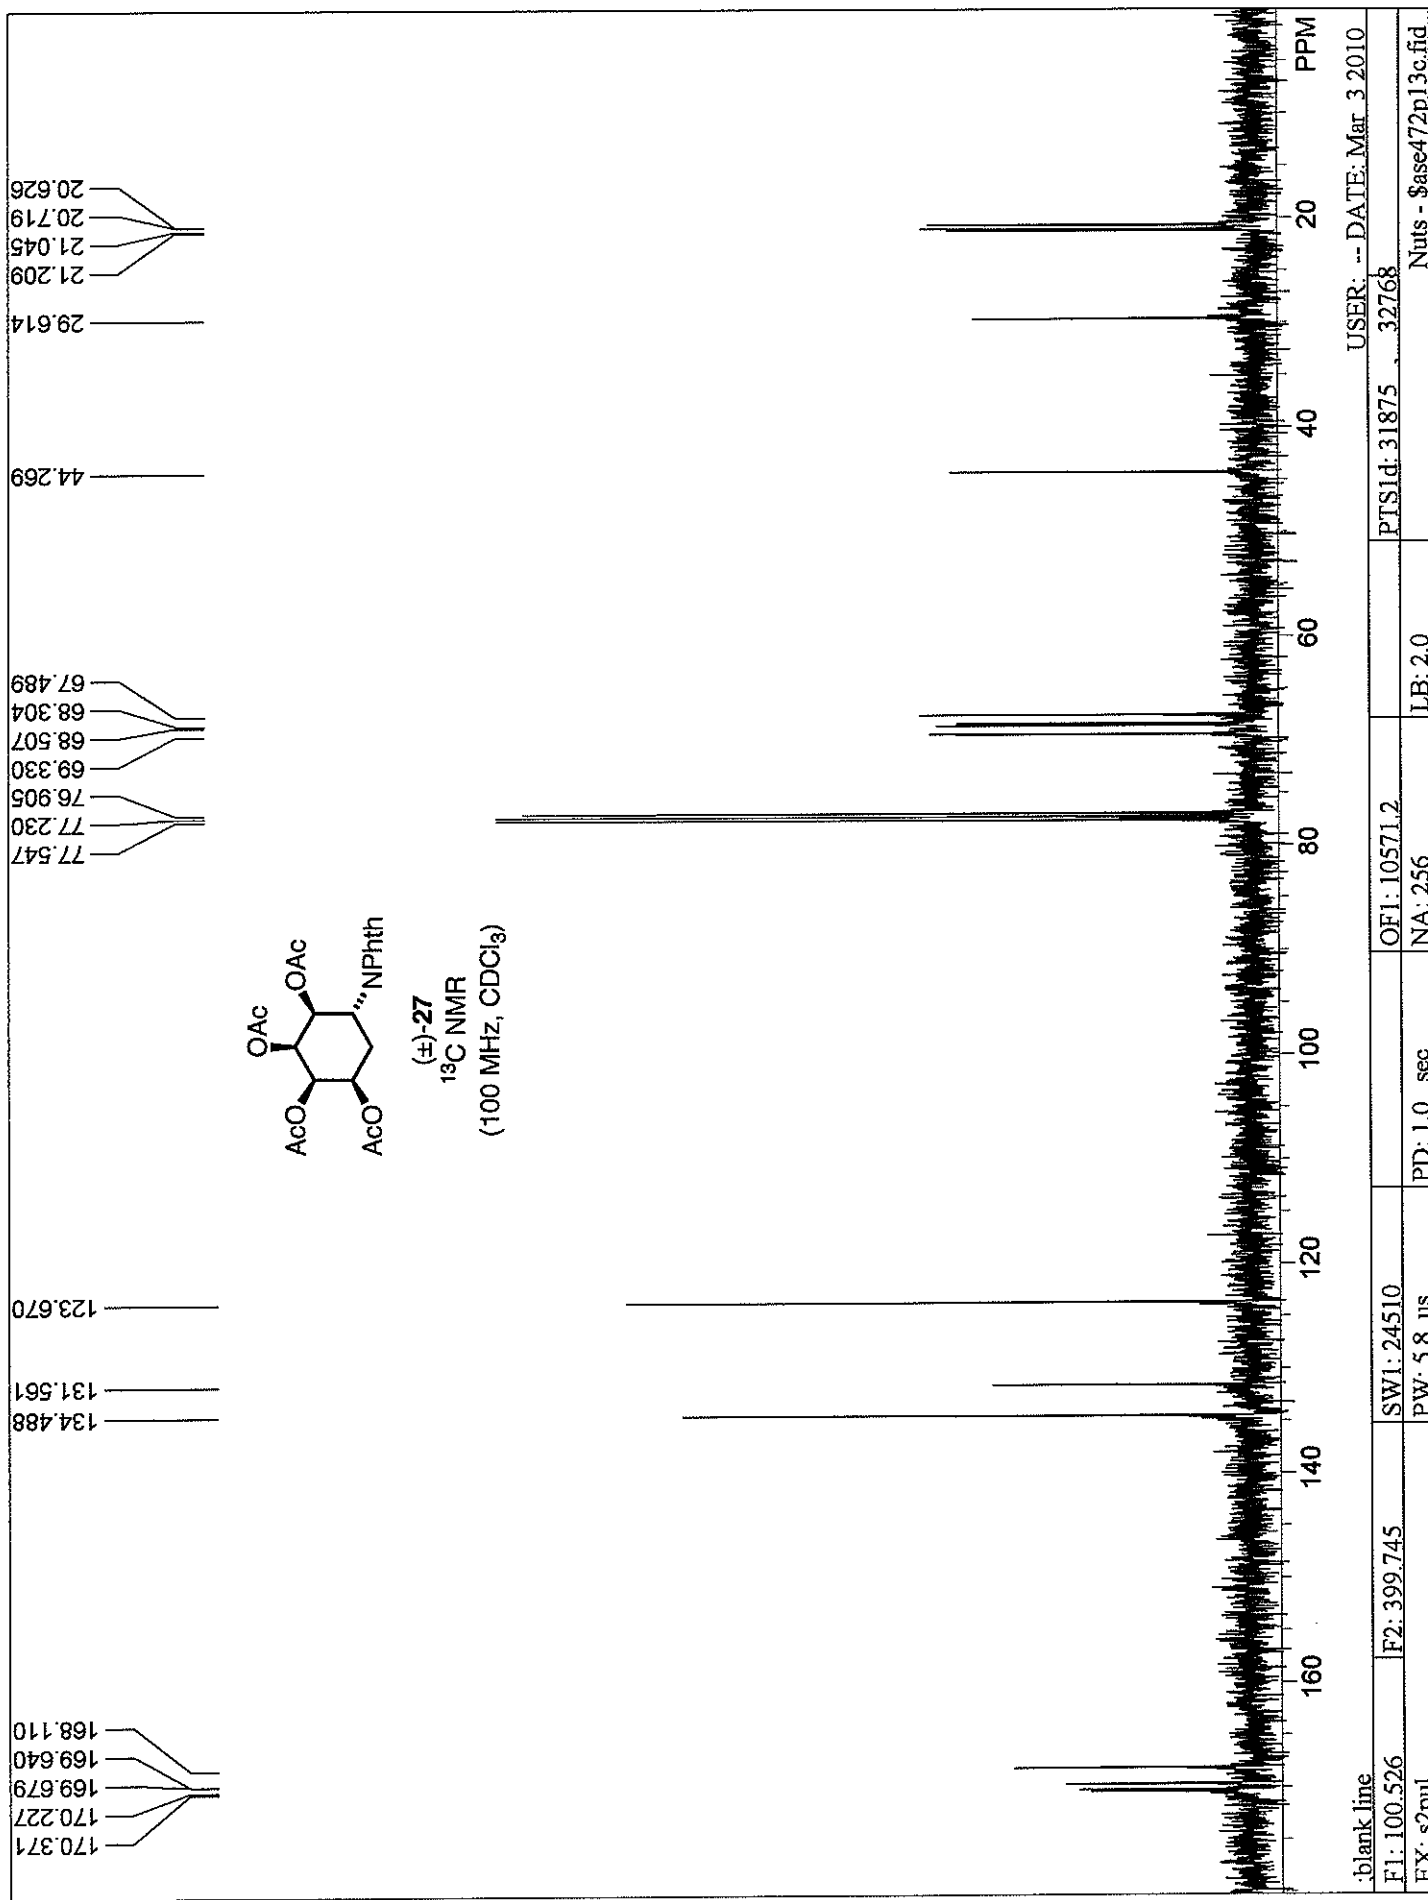



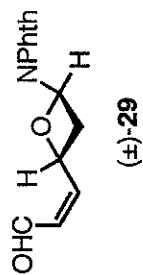

<sup>1</sup>H NMR  
(400 MHz, CDCl<sub>3</sub>)

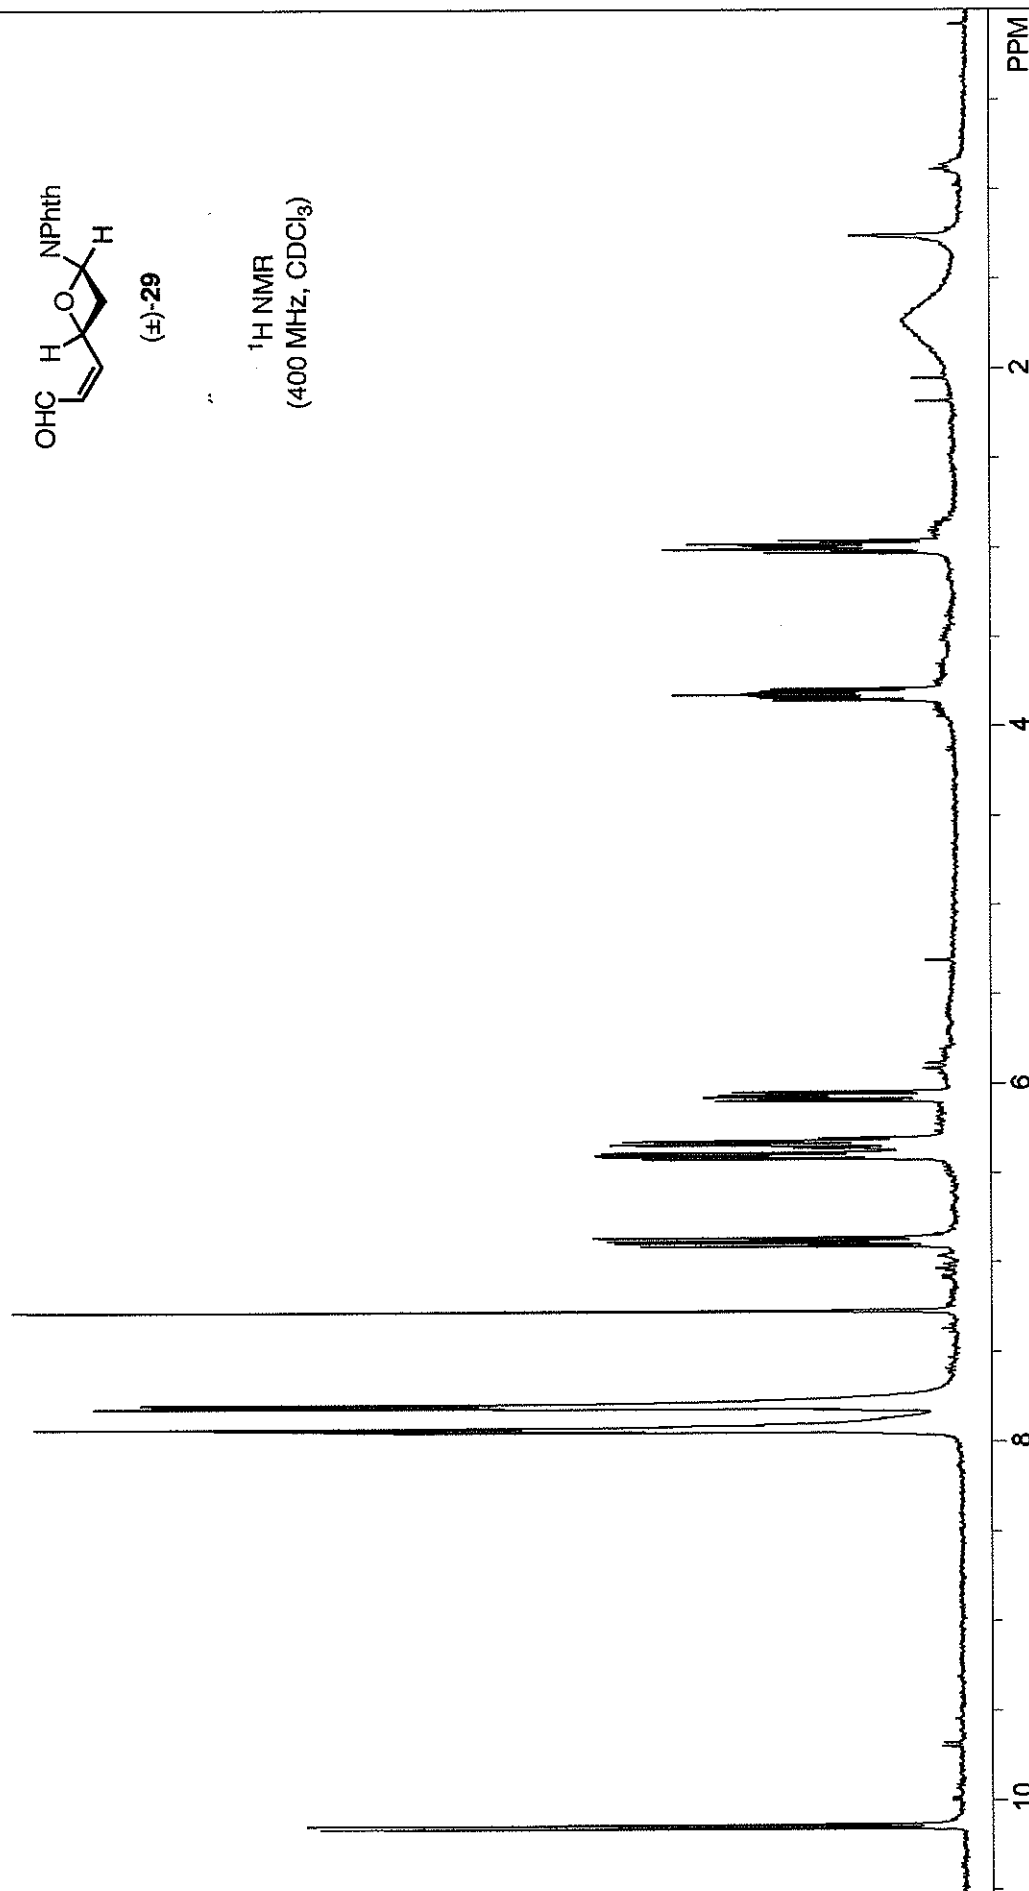

|             |             |                            |                       |
|-------------|-------------|----------------------------|-----------------------|
| .blank line |             | USER: -- DATE: Jul 19 2009 |                       |
| F1: 399.746 | F2: 100.525 | OF1: 2402.9                | PTS1d: 13132_16384    |
| EX: s2pul   | PW: 8.0 us  | NA: 8                      | LB: 0.5               |
|             | PD: 1.0 sec |                            | Nuts - \$ase330f3.fid |

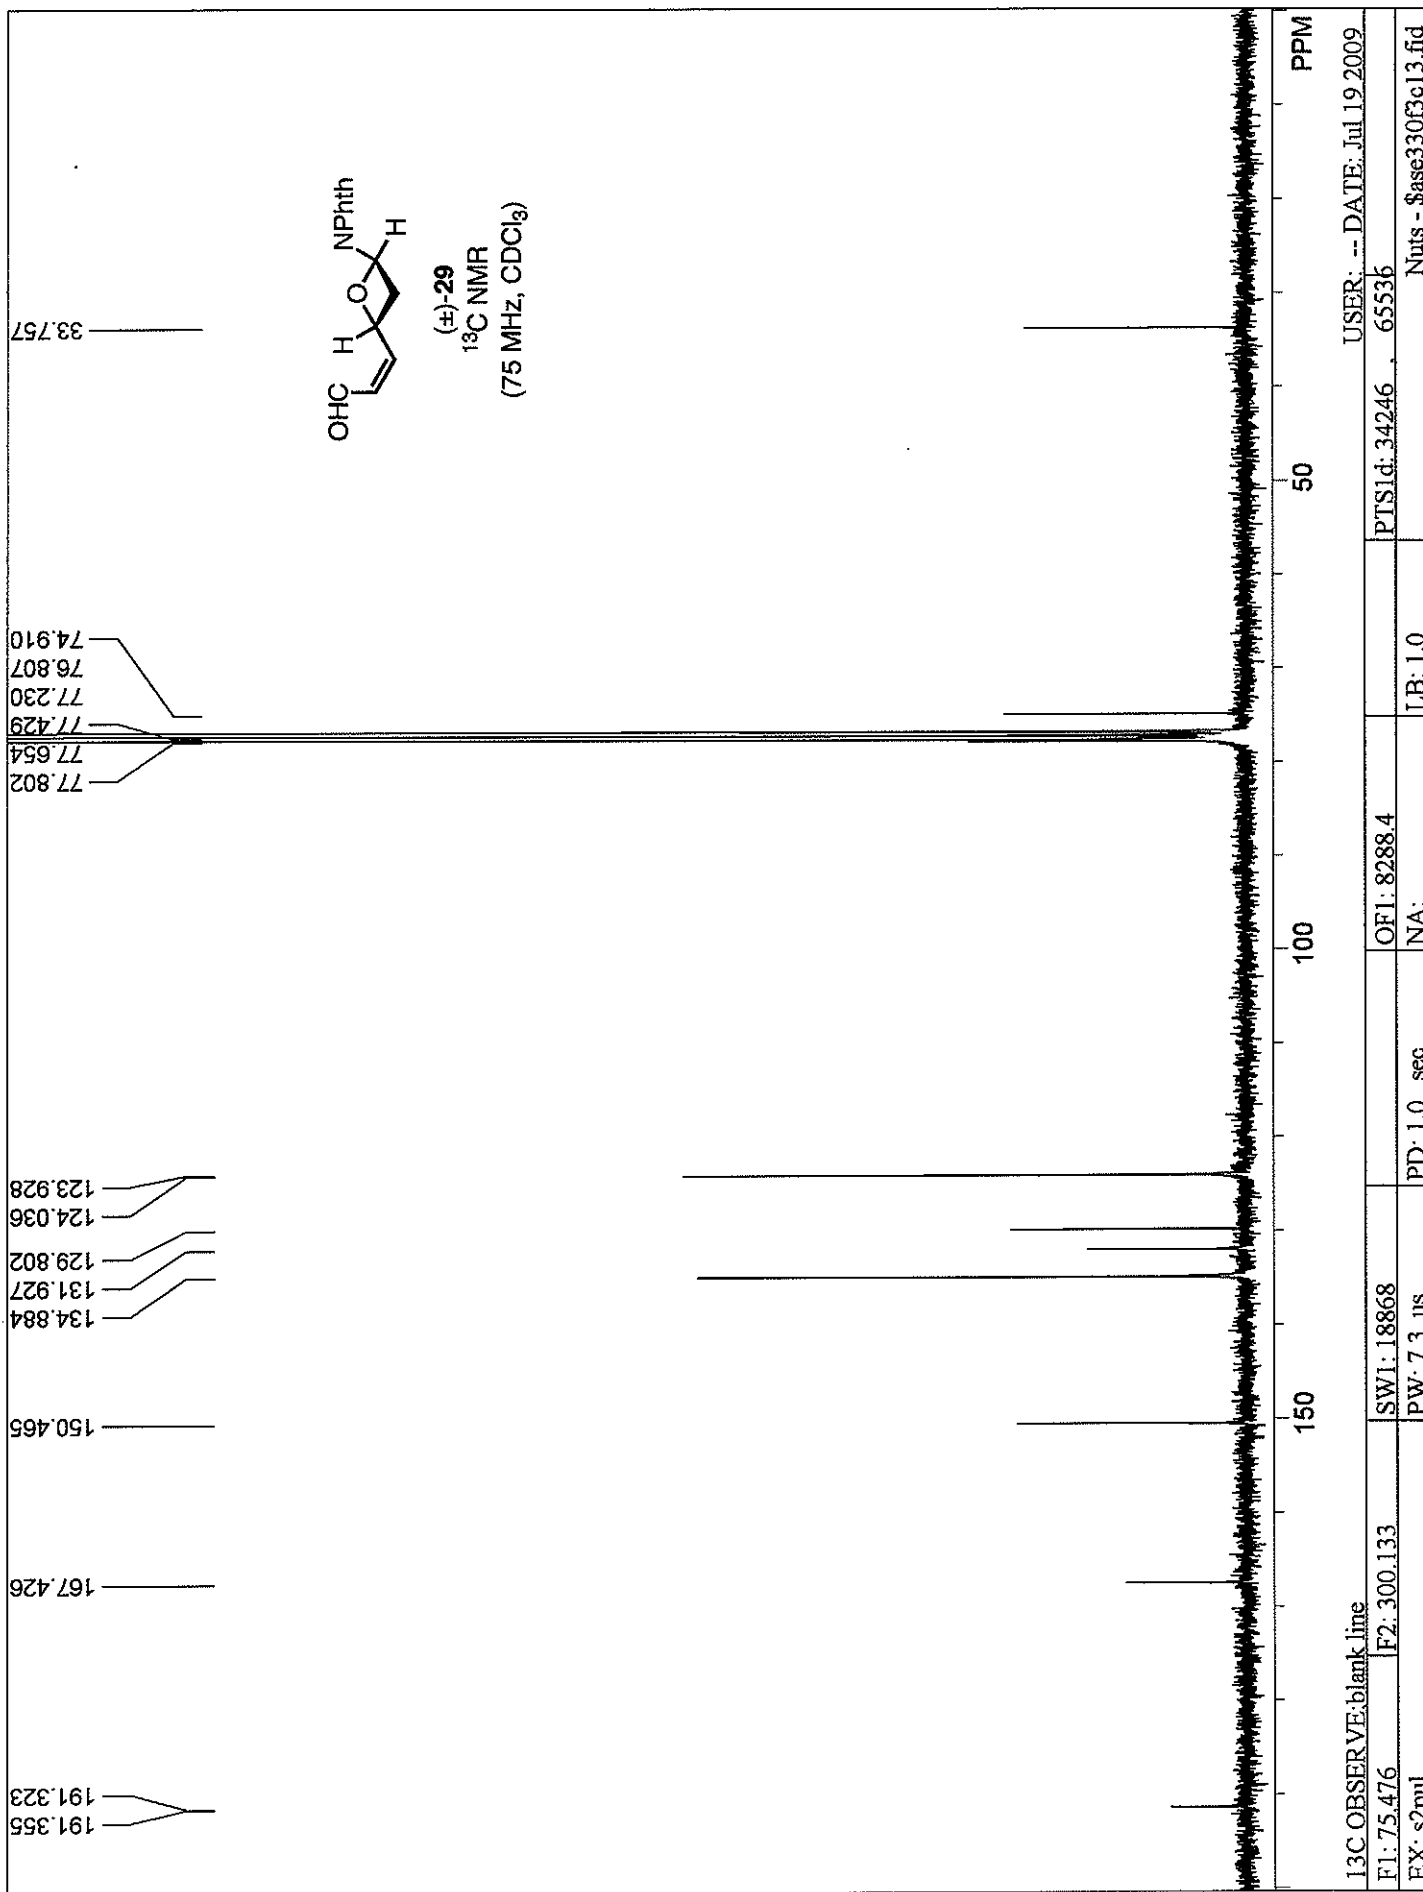

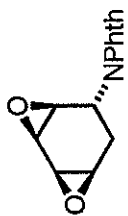

(+)-30

<sup>1</sup>H NMR

(400 MHz, CDCl<sub>3</sub>)

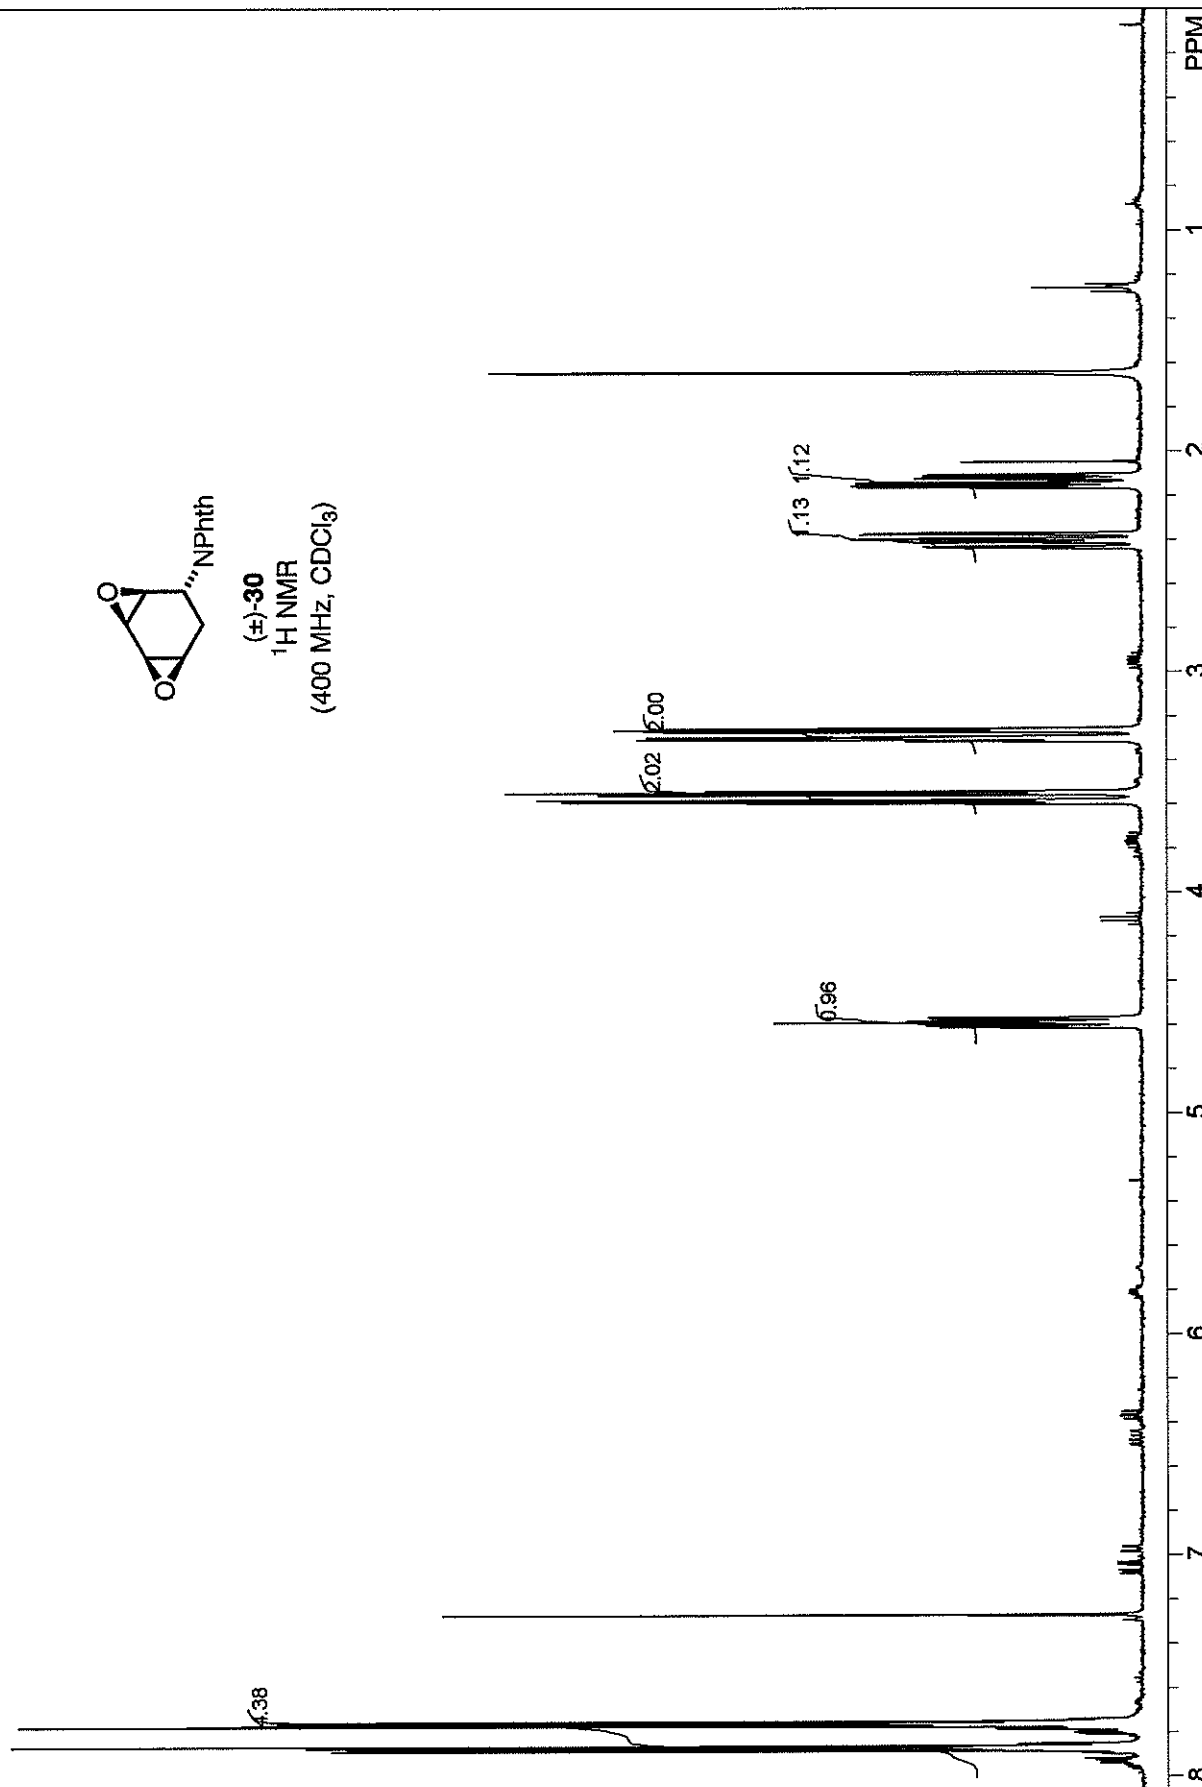

.blank line

F1: 399.746 F2: 100.525 SW1: 6410

EX: s2pul PW: 8.0 us PD: 1.0 sec

OF1: 2398.4

NA: 8 LB: 0.0

PTSId: 13132 16384

USER: -- DATE: Jul 18 2009

Nuts - \$ase330f4.fid

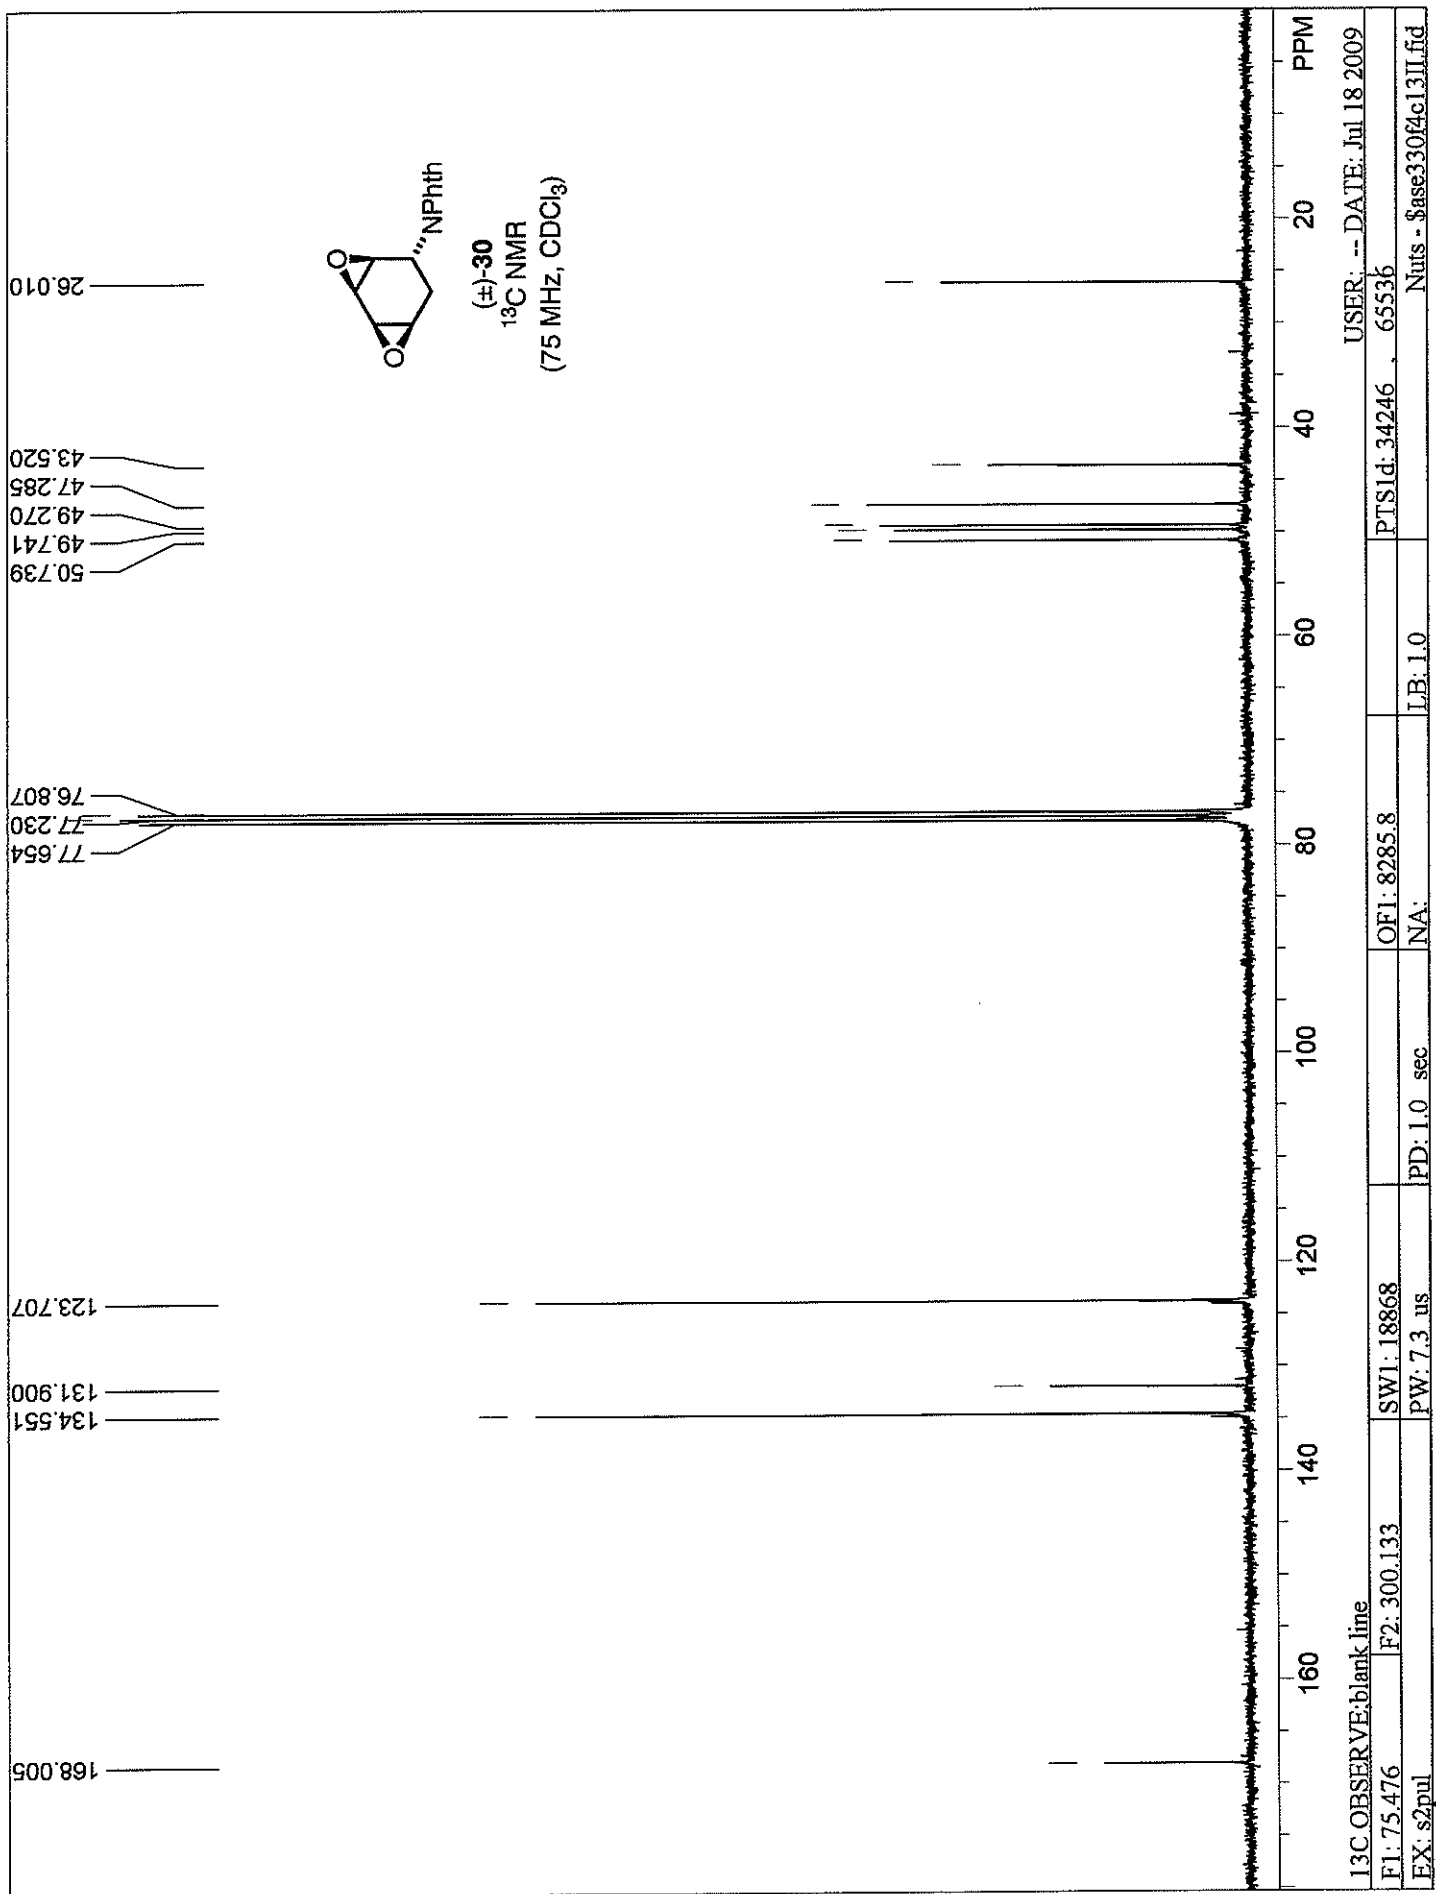

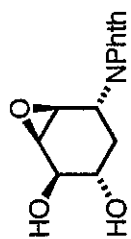

(±)-**33**  
<sup>1</sup>H NMR  
(300 MHz, CD<sub>3</sub>OD)

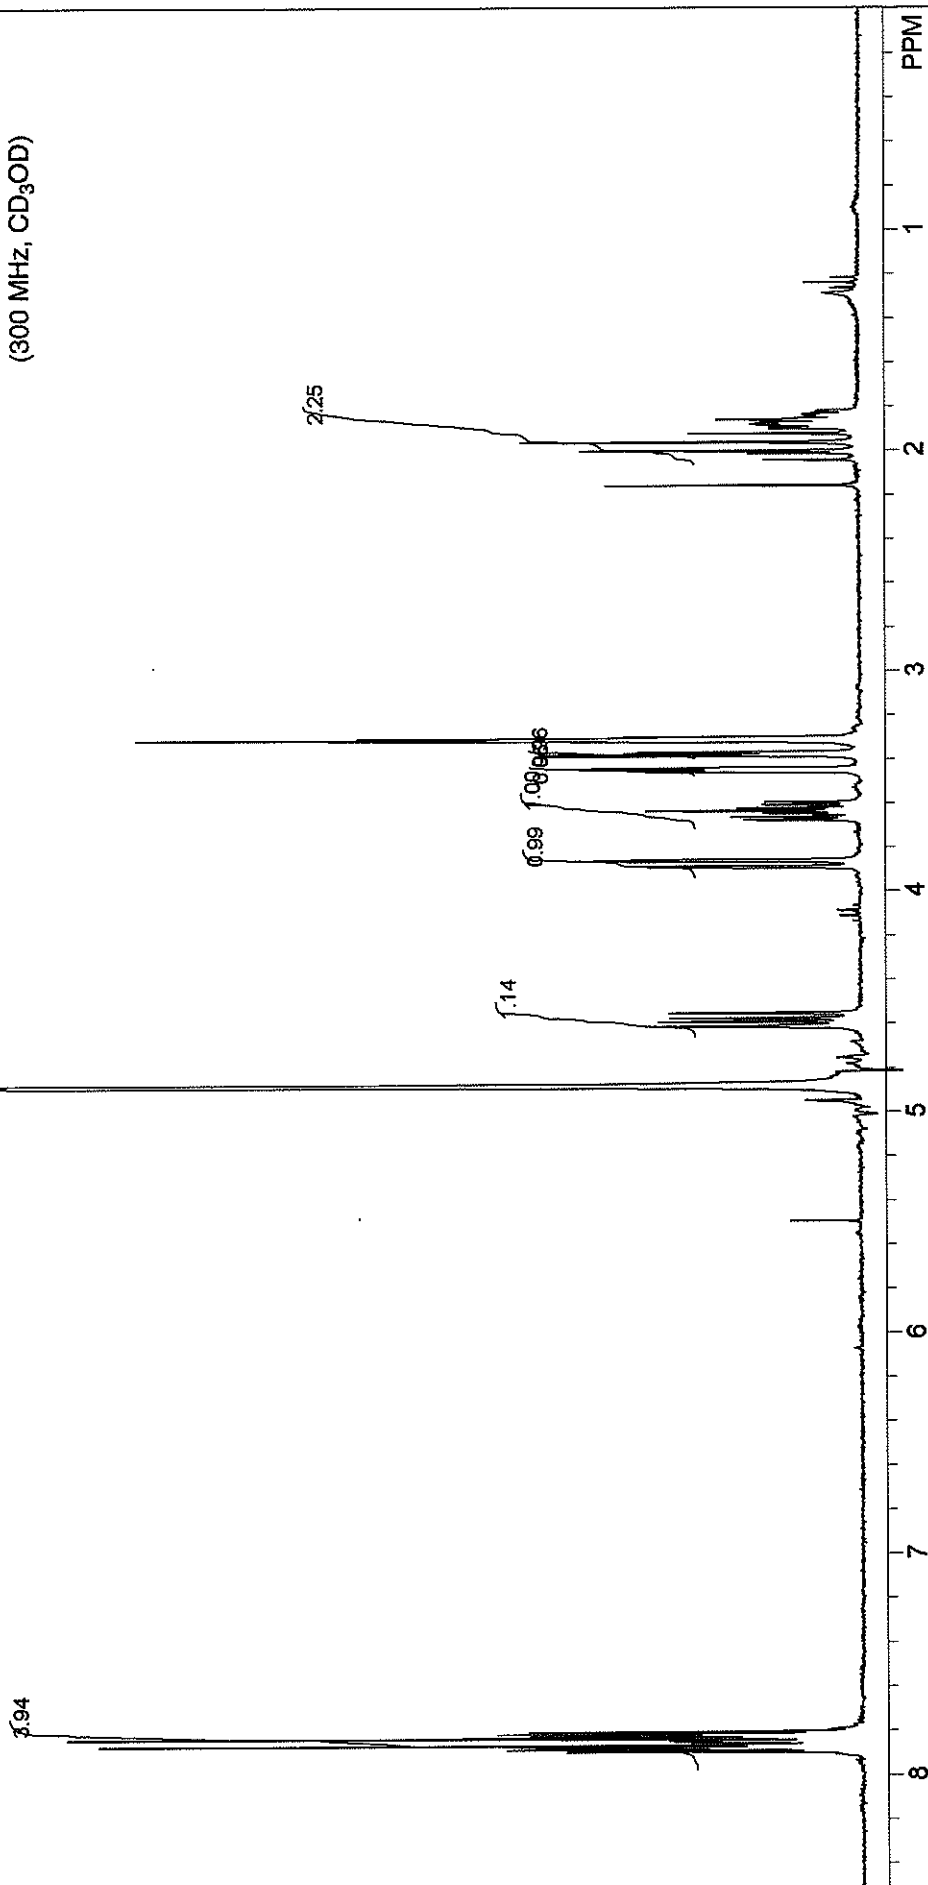

STANDARD 1H OBSERVE:blank line

USER: -- DATE: Aug 8 2009

|             |            |            |             |             |                      |
|-------------|------------|------------|-------------|-------------|----------------------|
| FI: 300.134 | F2: 75.476 | SW1: 4803  | OF1: 1802.7 | PTSId: 9596 | 16384                |
| EX: s2pul   |            | PW: 6.3 us | PD: 1.0 sec | NA: 8       | LB: 0.0              |
|             |            |            |             |             | Nuts - \$ase340q.fid |

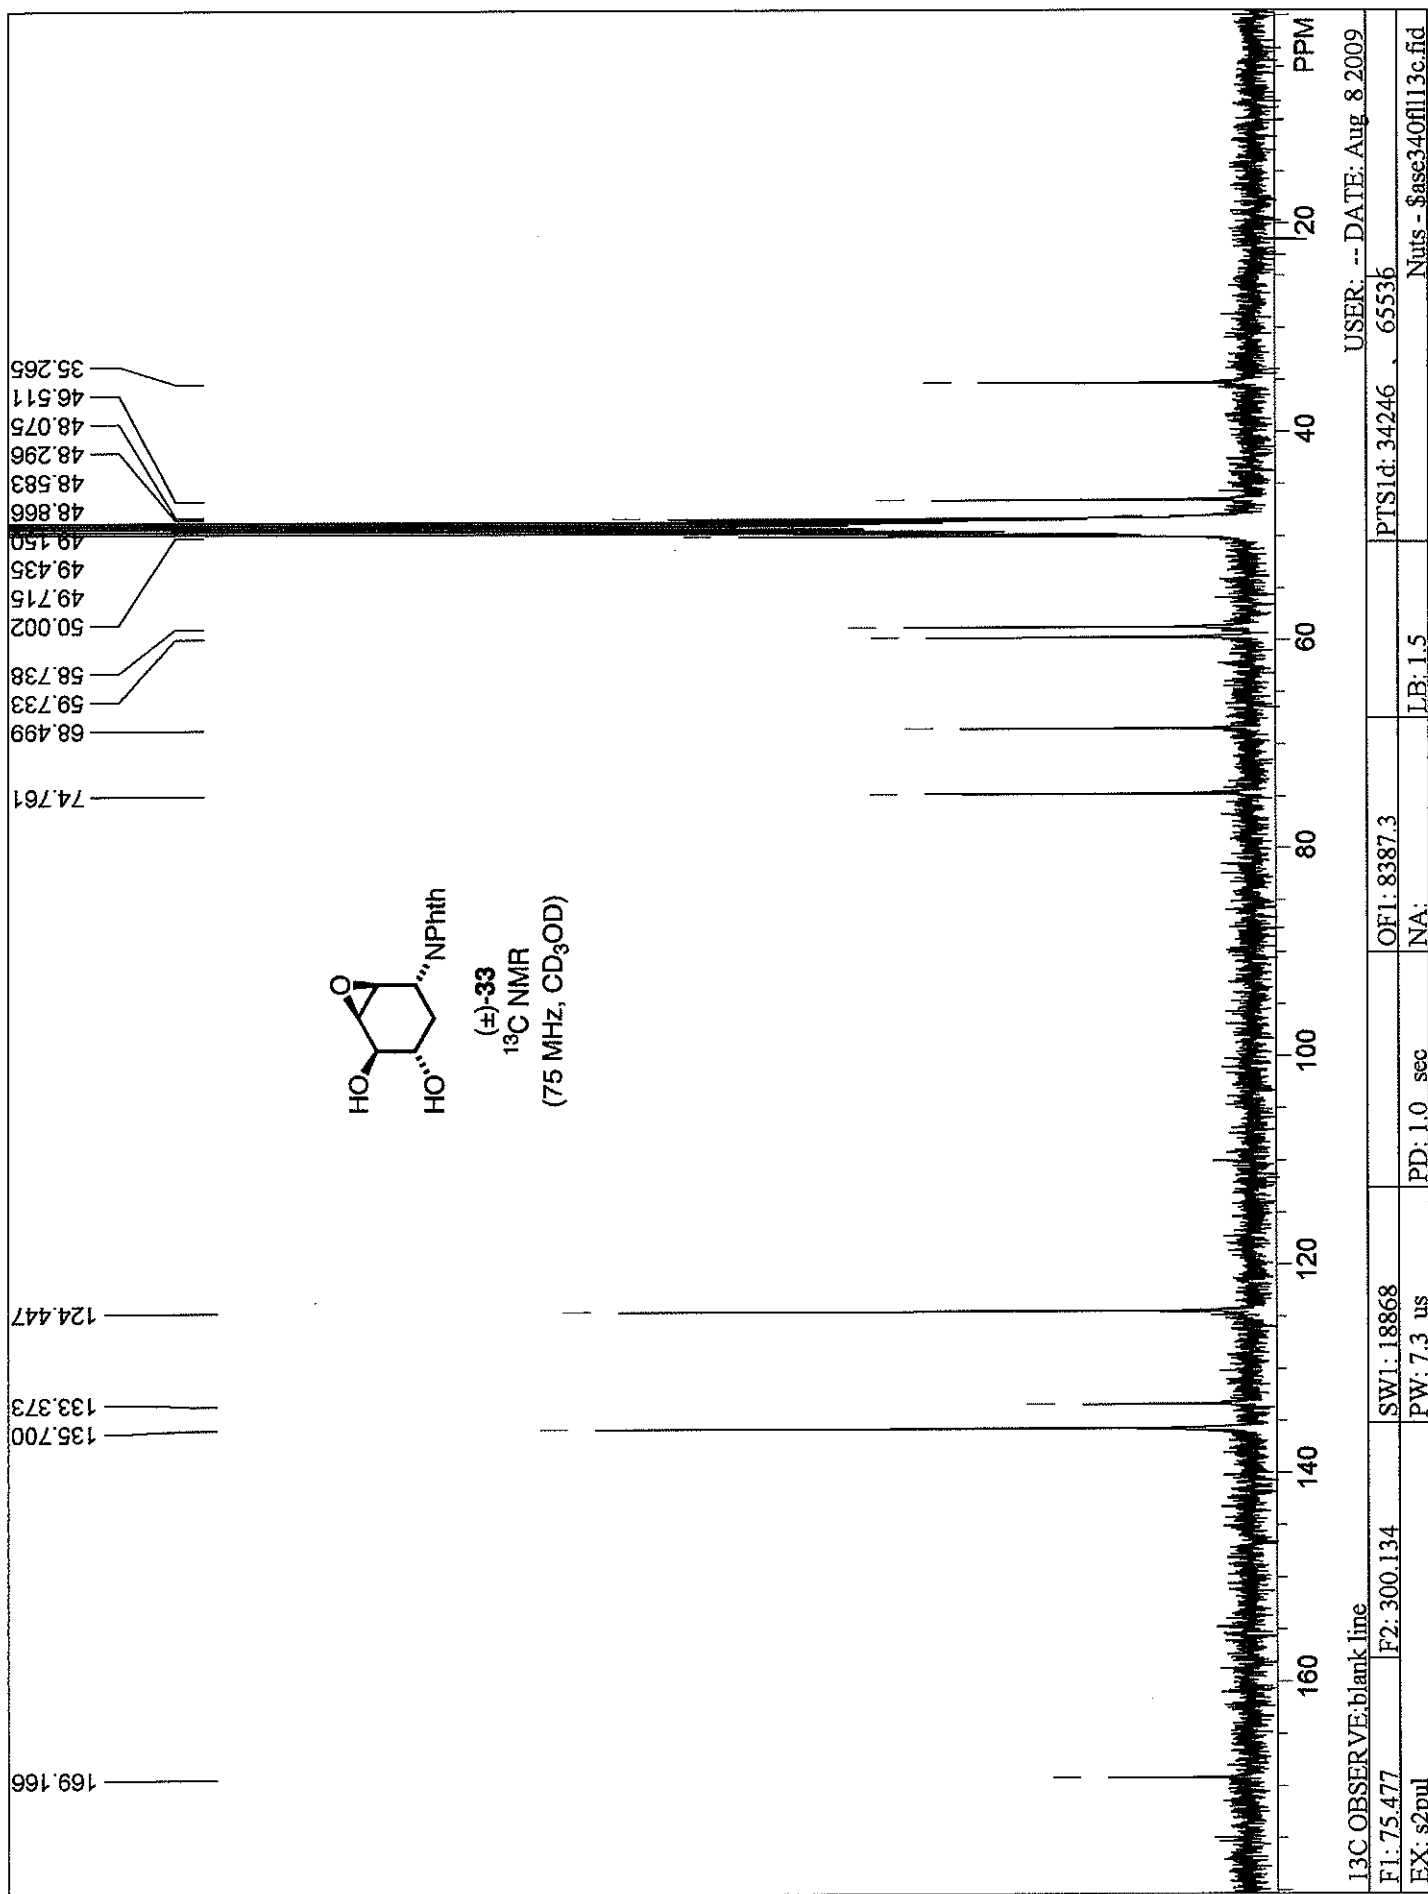

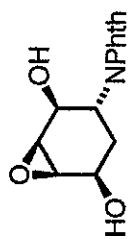

<sup>1</sup>H NMR  
(400 MHz, CD<sub>3</sub>OD)

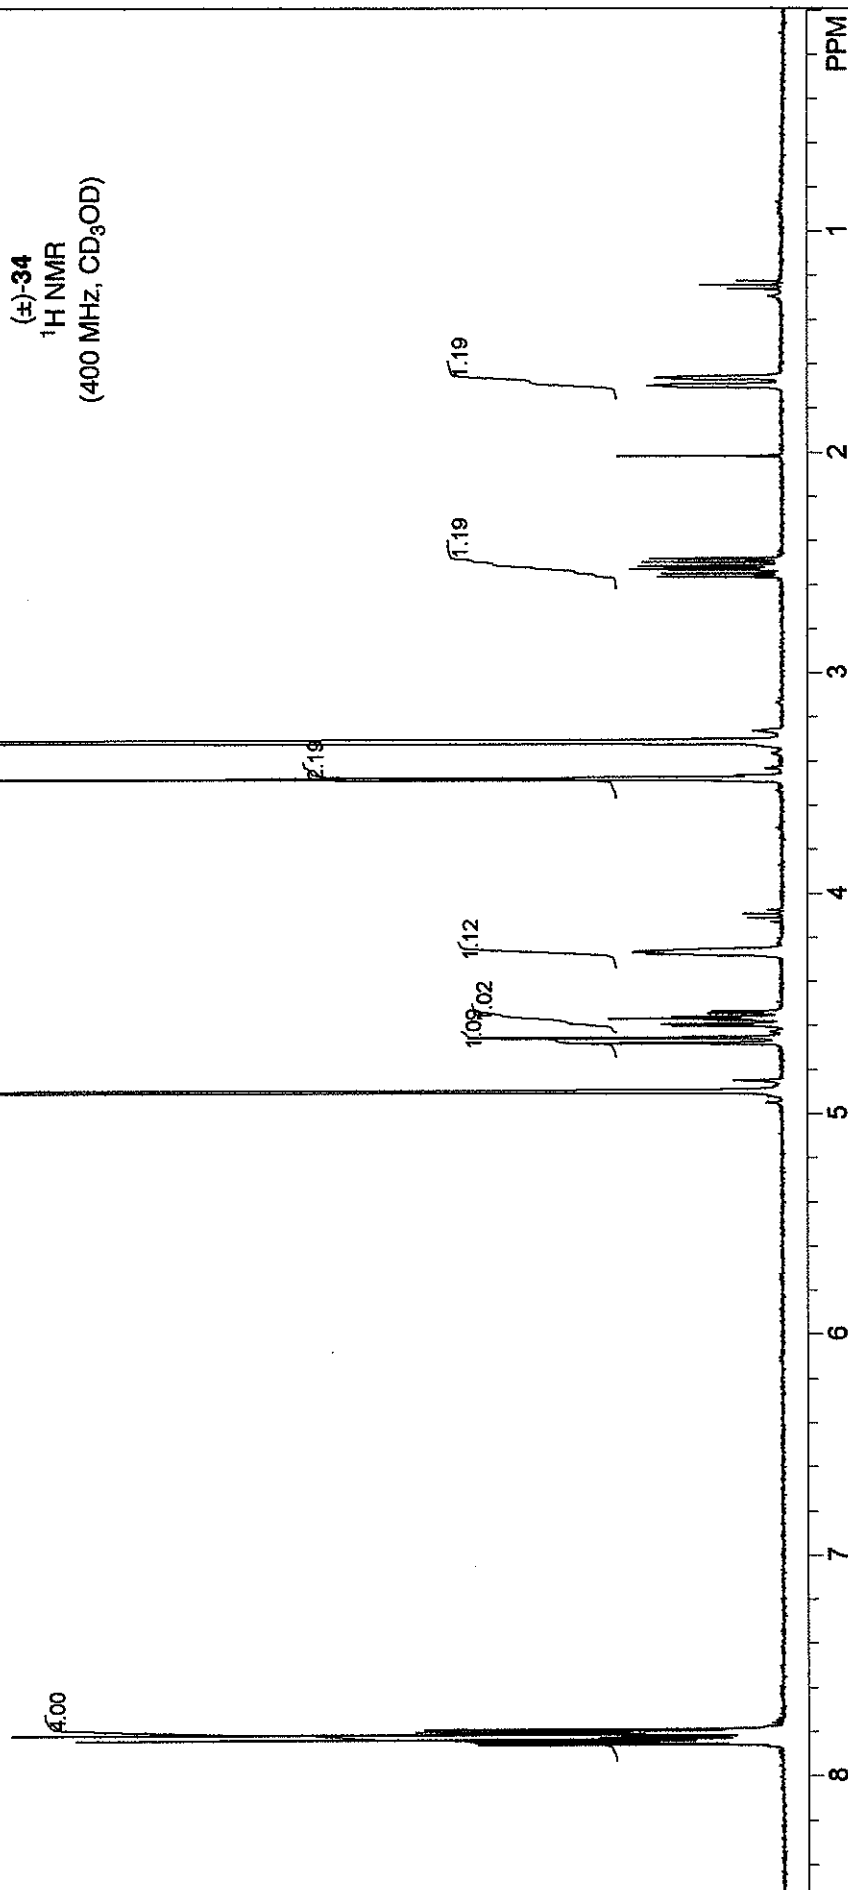

|             |             |                           |                      |
|-------------|-------------|---------------------------|----------------------|
| :blank line |             | USER: -- DATE: Mar 4 2002 |                      |
| F1: 399.753 | F2: 100.527 | OF1: 2401.6               | PTSID: 13132_16384   |
| EX: s2pul   | PW: 8.0 us  | NA: 8                     | LB: 0.0              |
|             | PD: 1.0 sec |                           | Nuts - \$ase239p.fid |

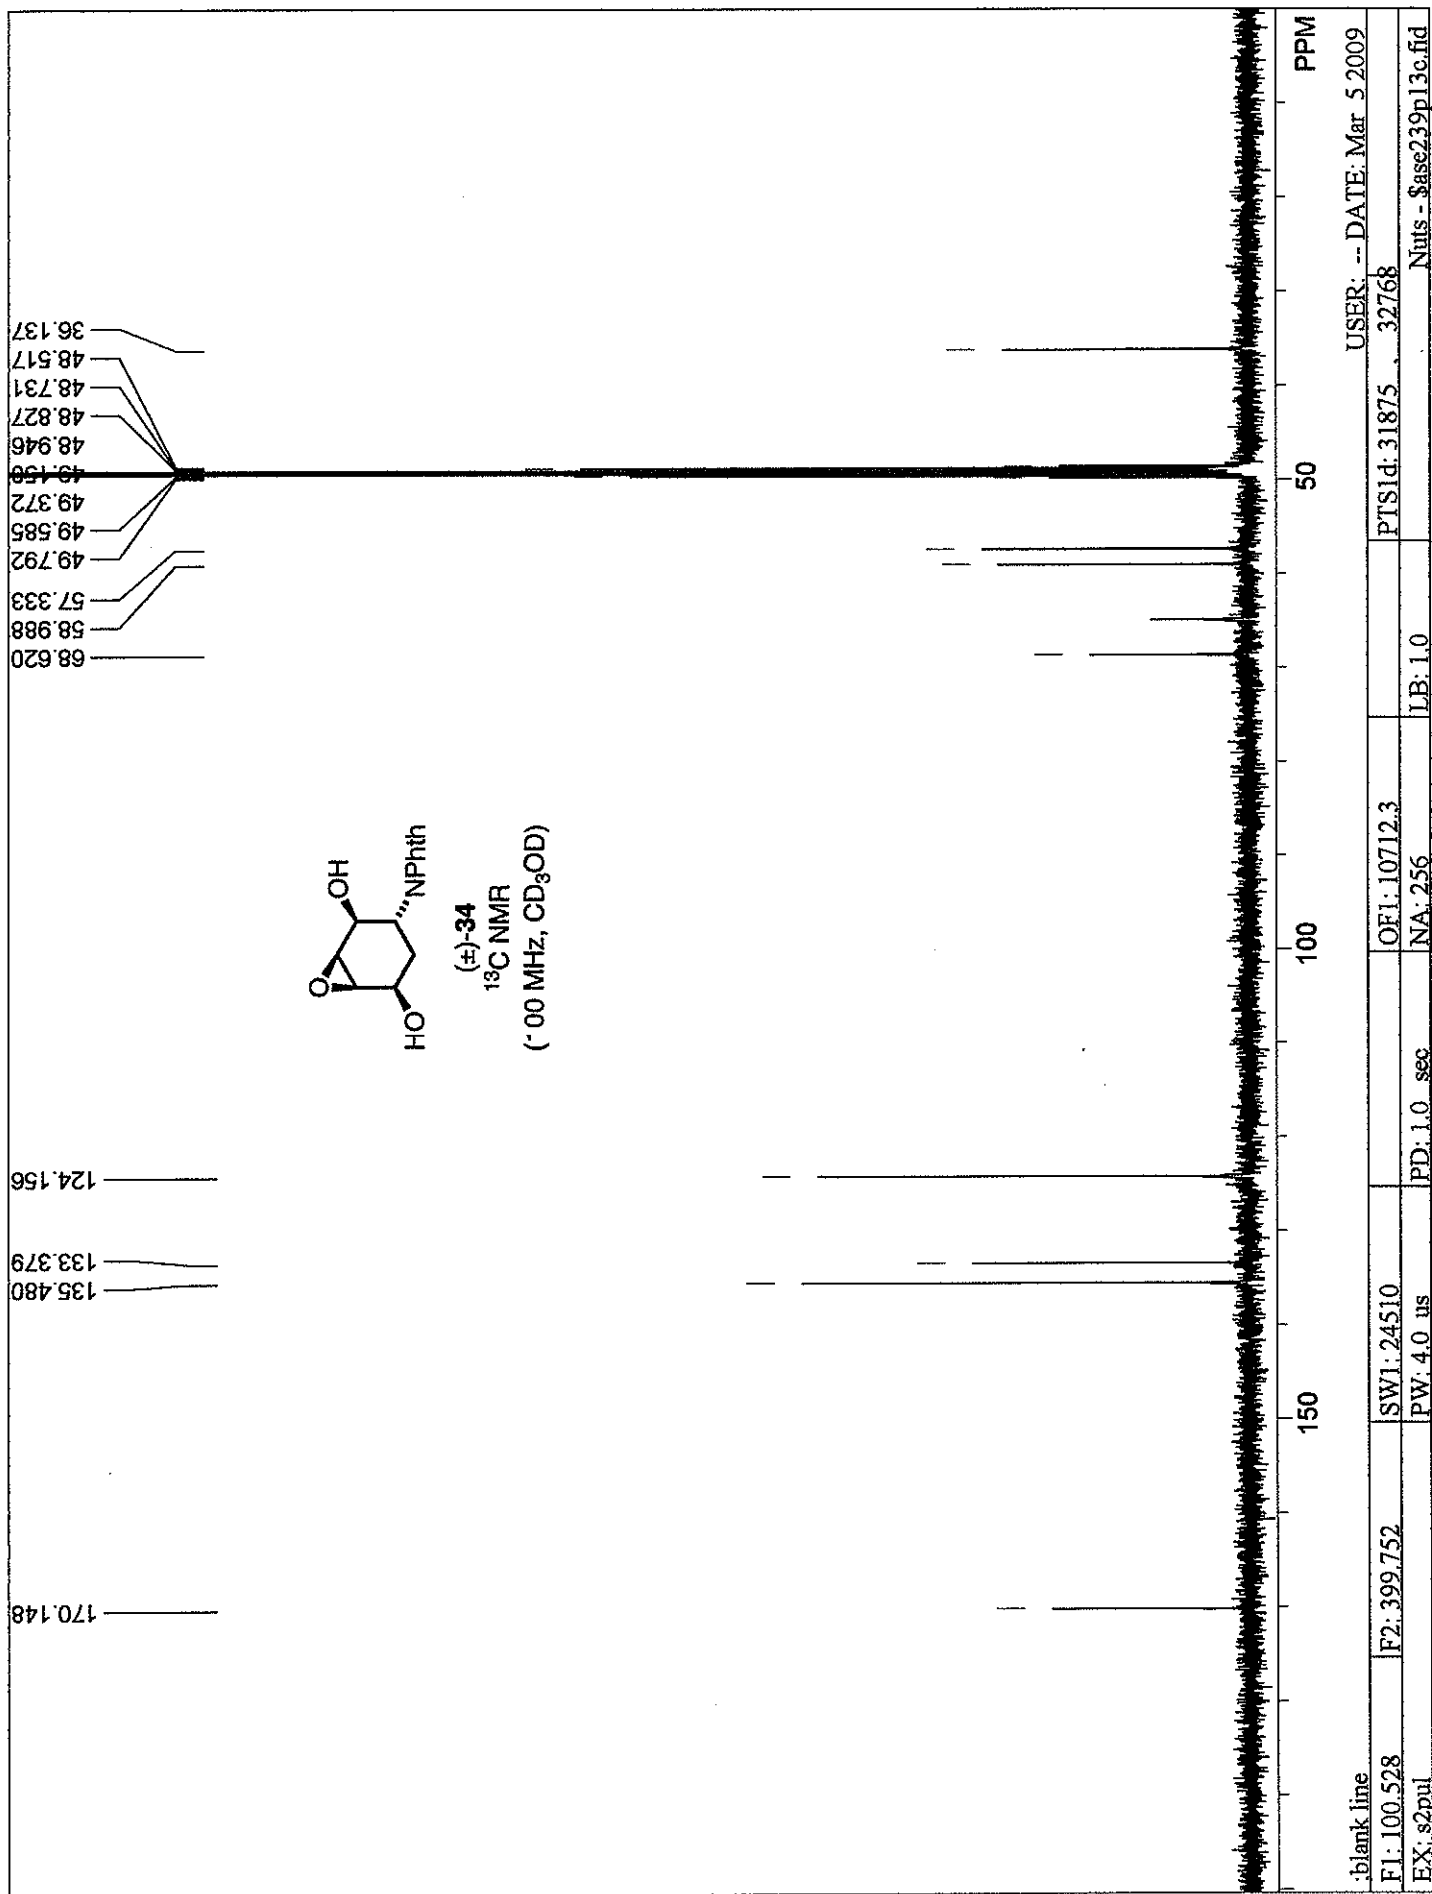



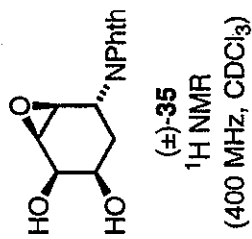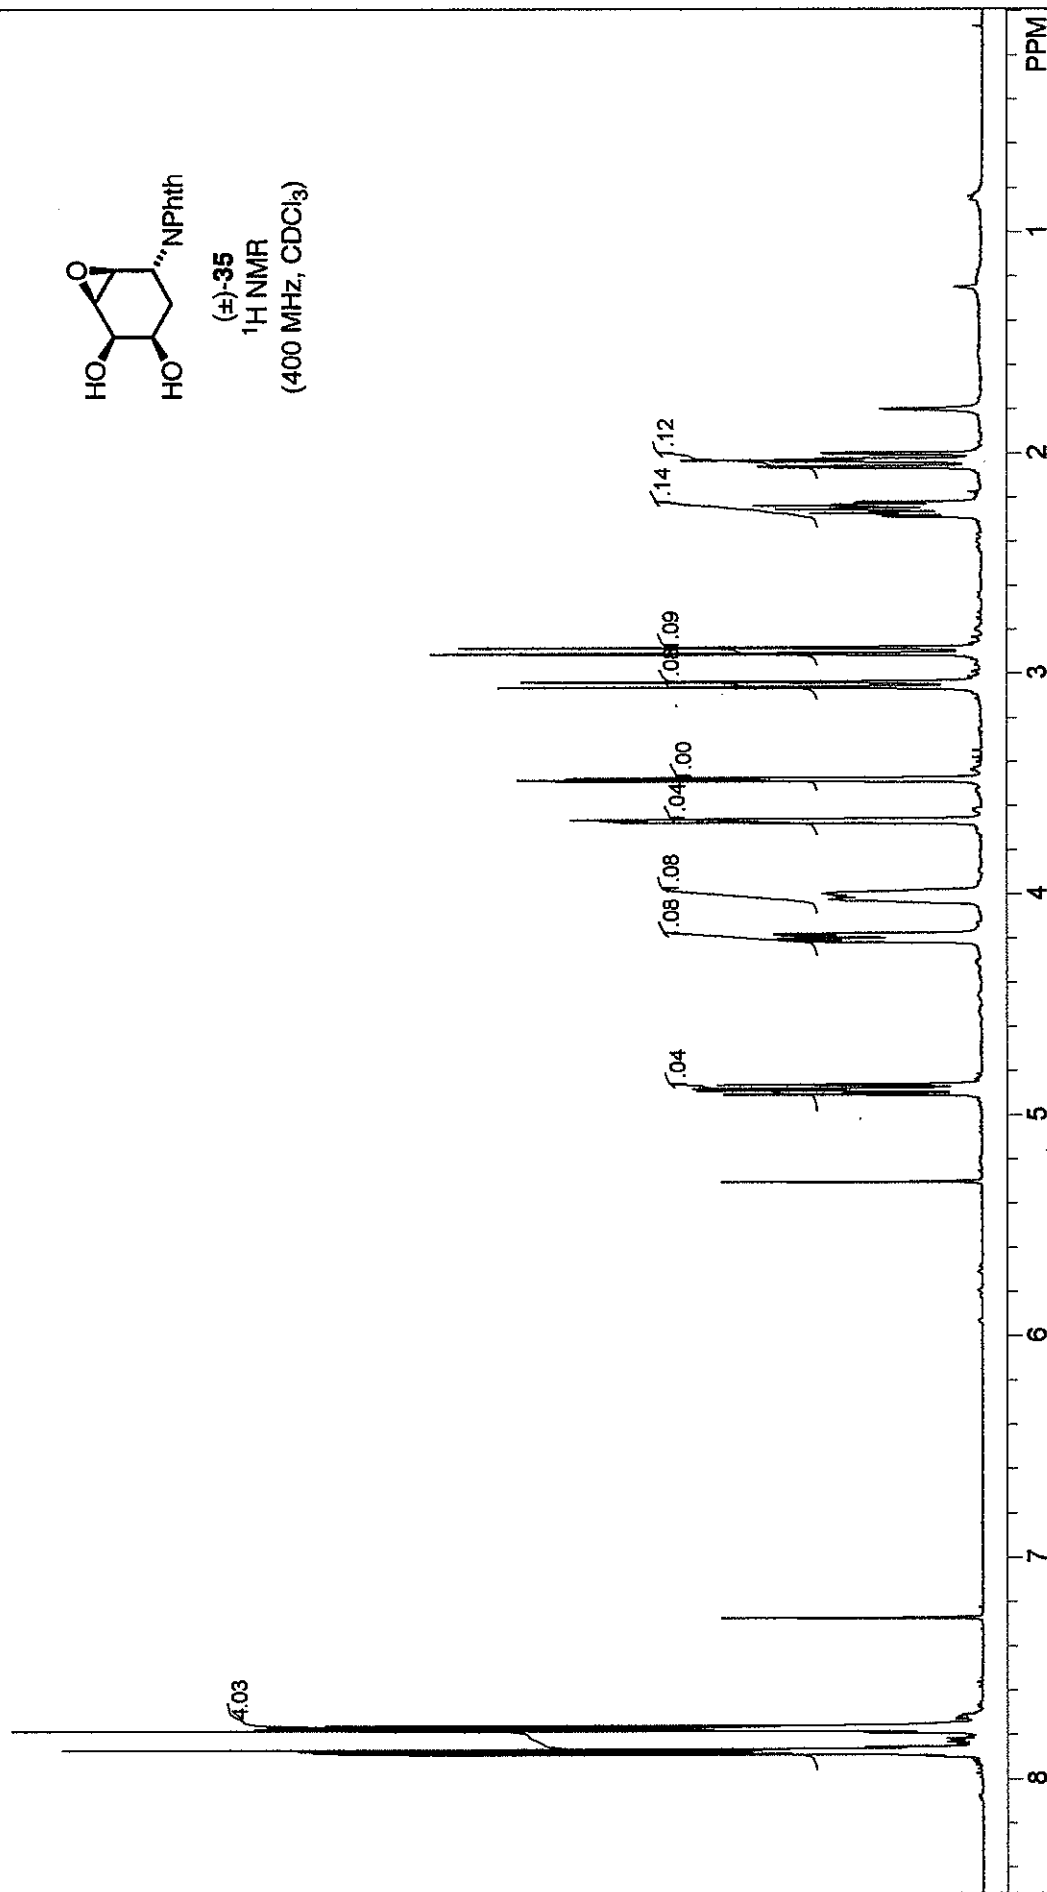

|             |             |                             |                        |
|-------------|-------------|-----------------------------|------------------------|
| .blank line |             | USER: ... DATE: Jan 15 2009 |                        |
| F1: 399.751 | F2: 100.526 | OF1: 2405.5                 | PTSId: 13132_16384     |
| EX: s2pul   | PW: 8.0 us  | NA: 8                       | LB: 0.0                |
|             | PD: 1.0 sec |                             | Nuis - \$ase011509.fid |

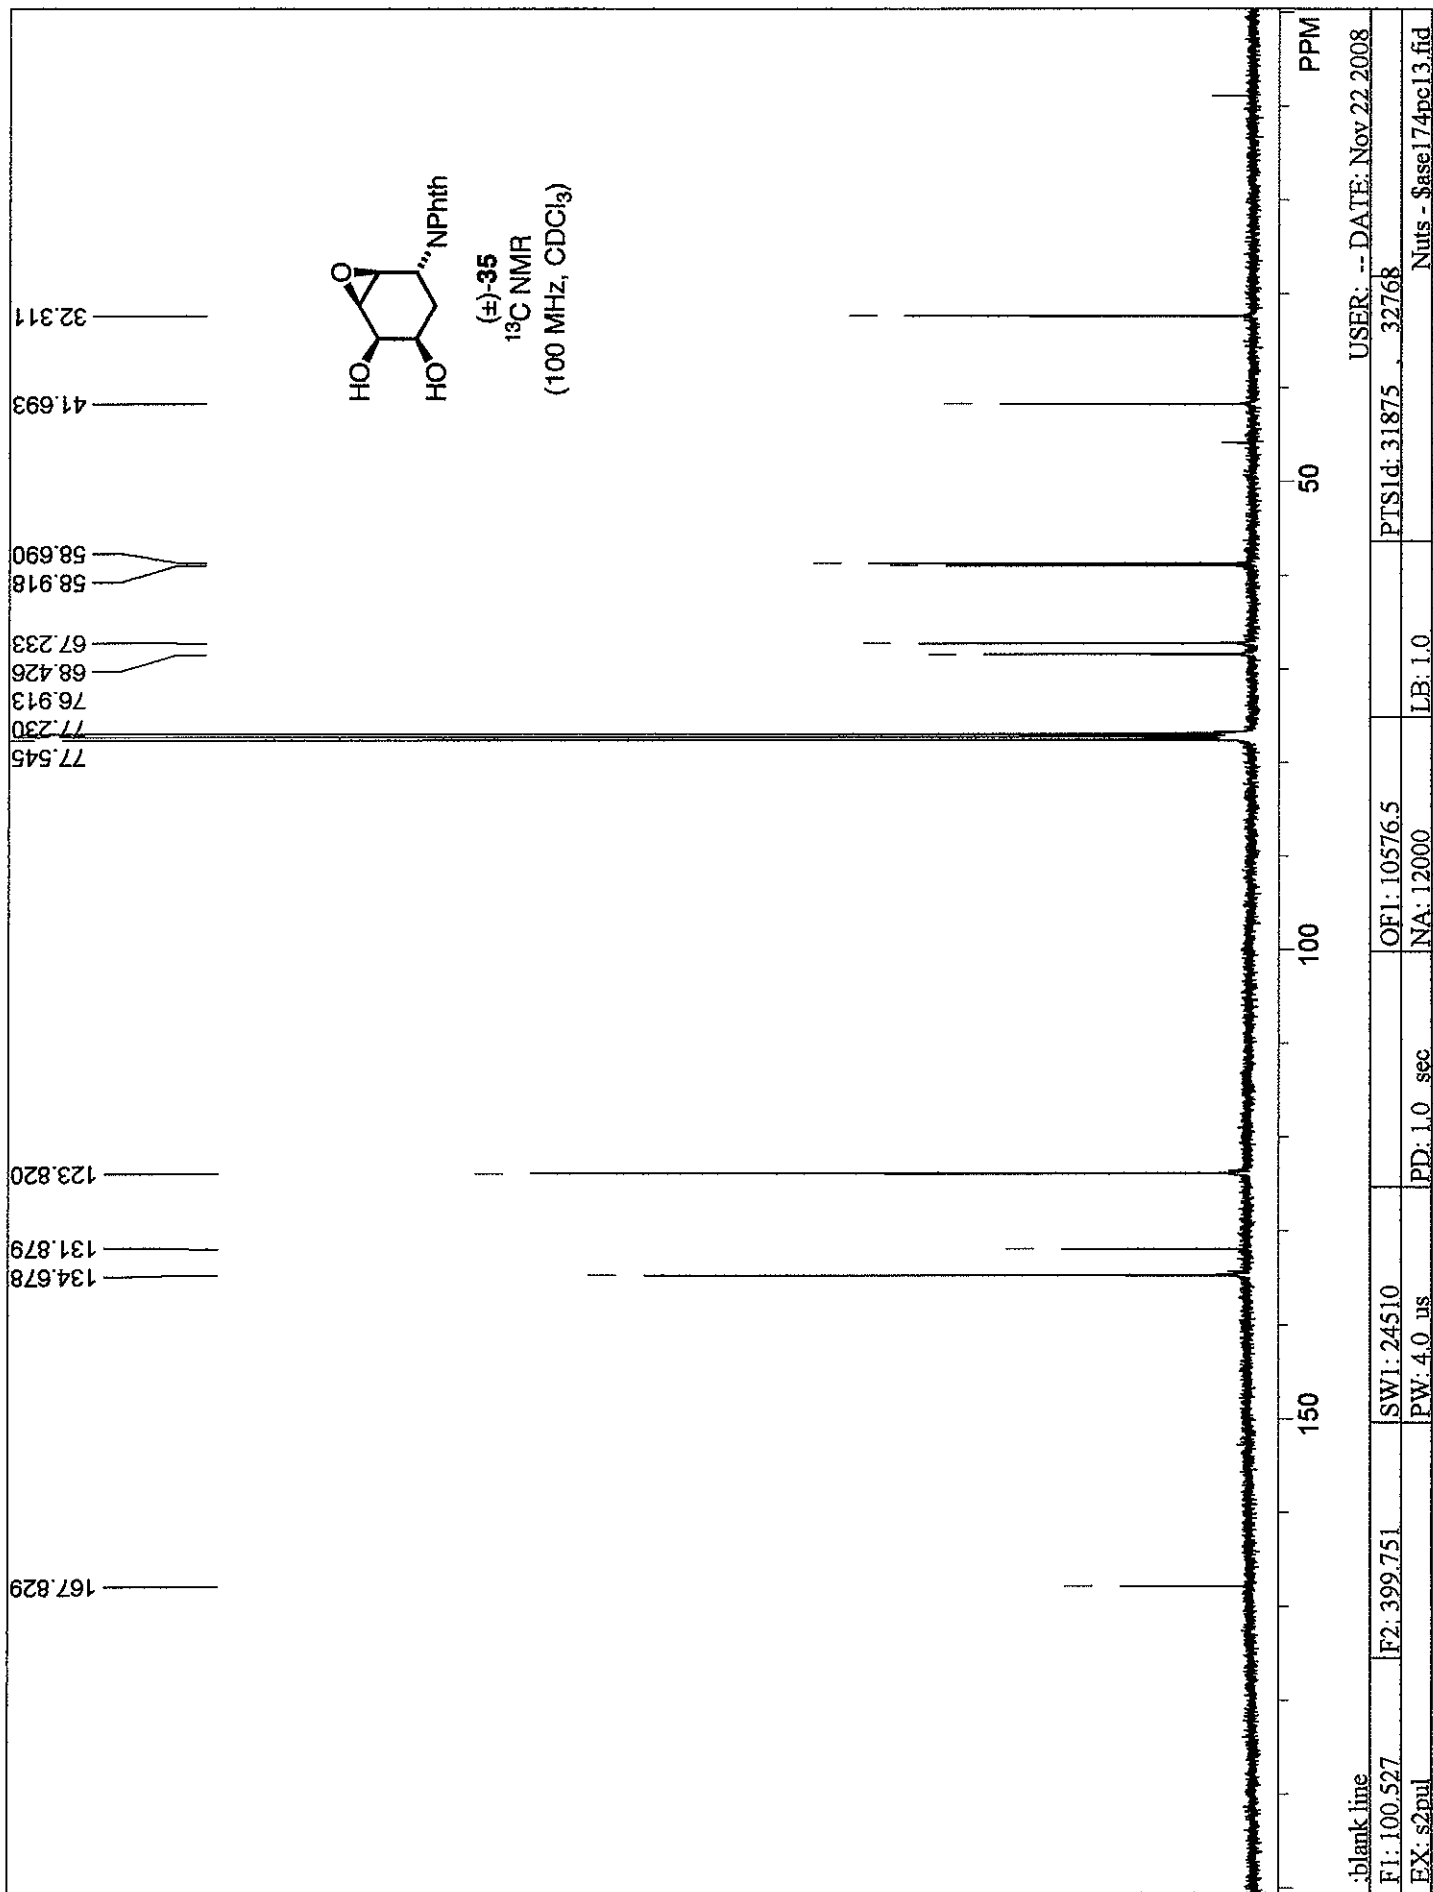

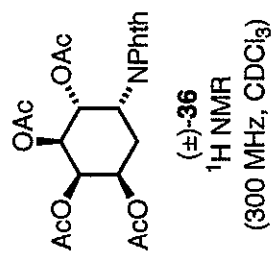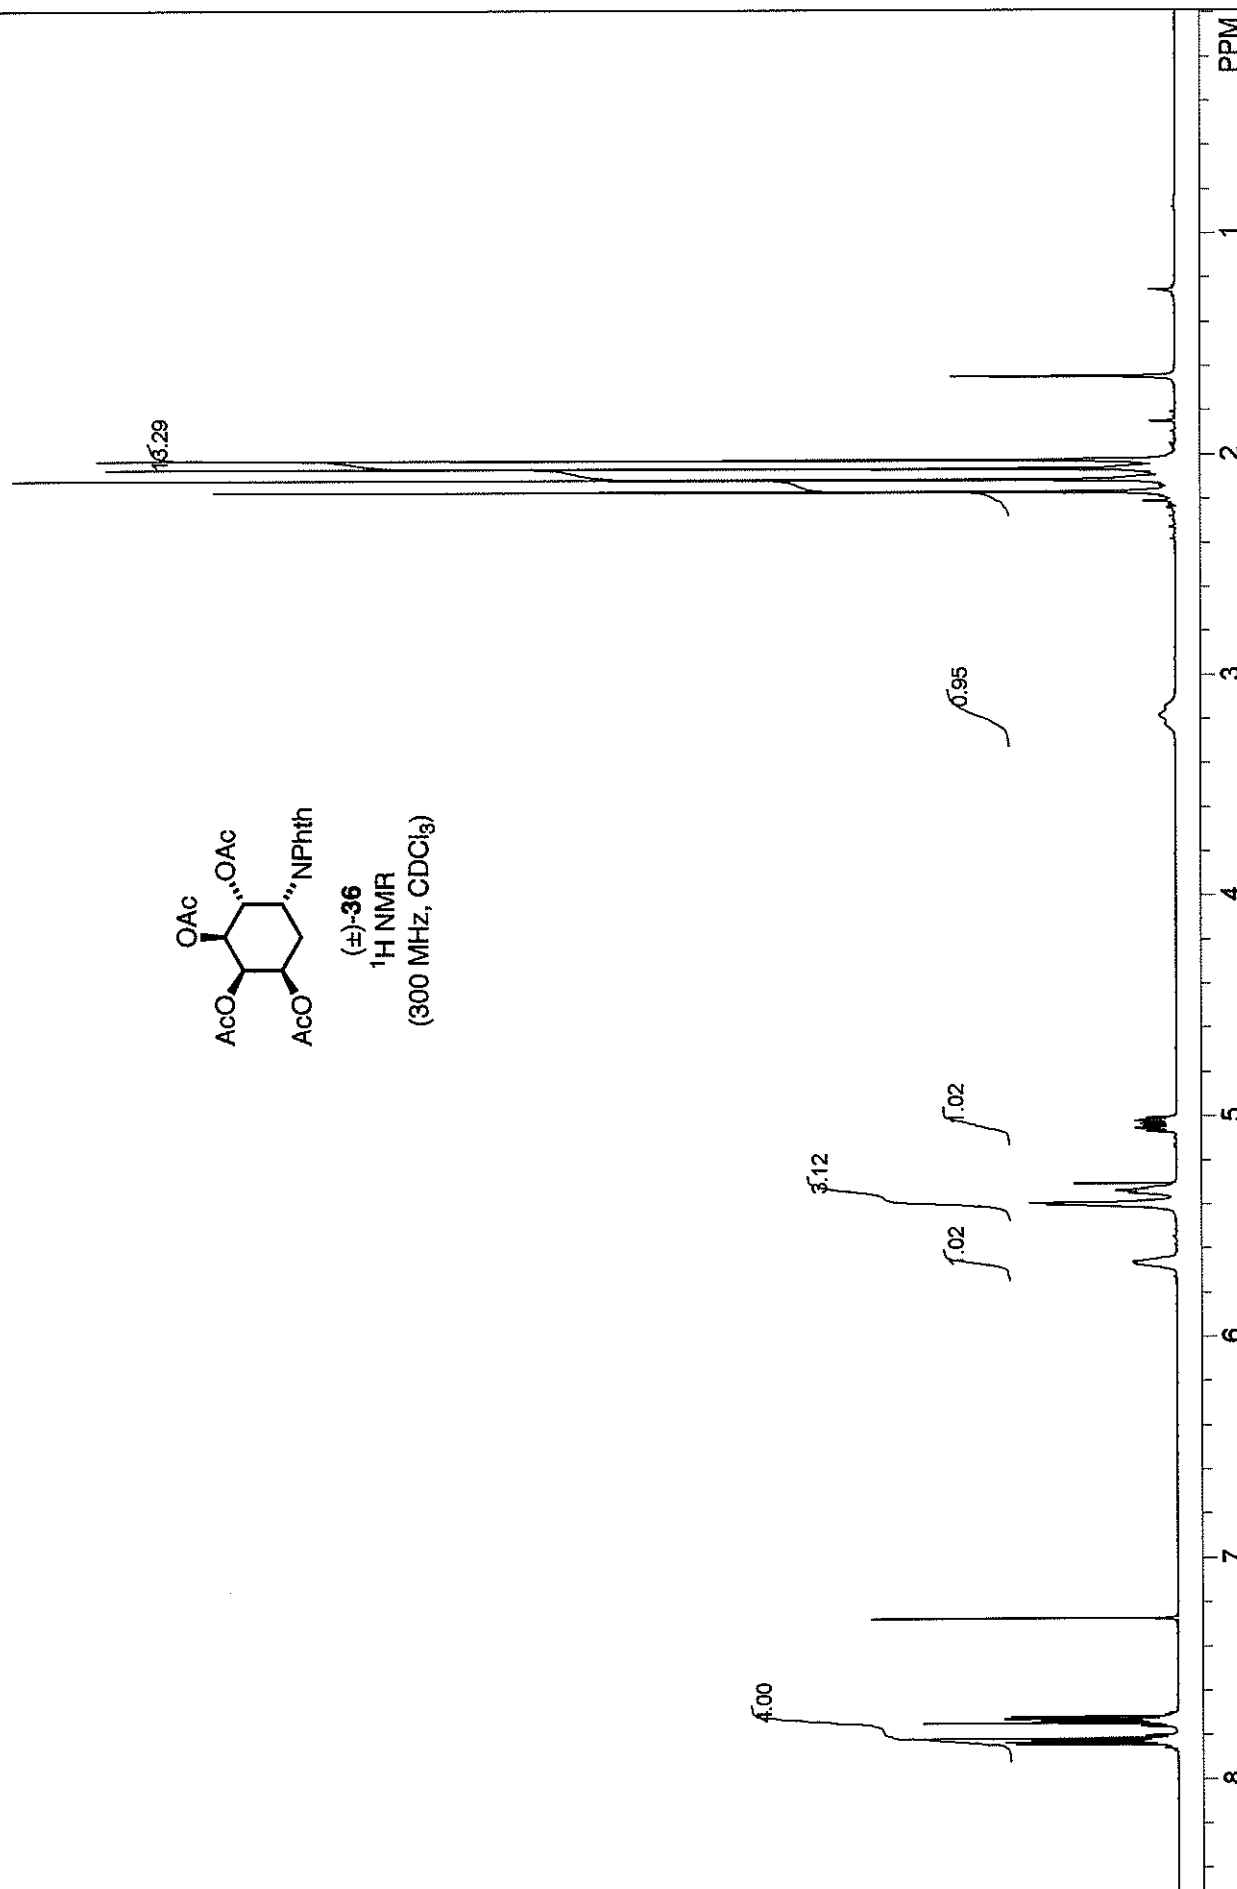

STANDARD 1H OBSERVE:blank line

FI: 300.133 F2: 75.476

EX: s2pul SW1: 4803 PW: 6.3 us PD: 1.0 .sec

OF1: 1804.6

NA: 8

PTSId: 9596

16384

USER: -- DATE: Aug 28 2009

Nuts - \$asbaiball.fid

LB: 0.0

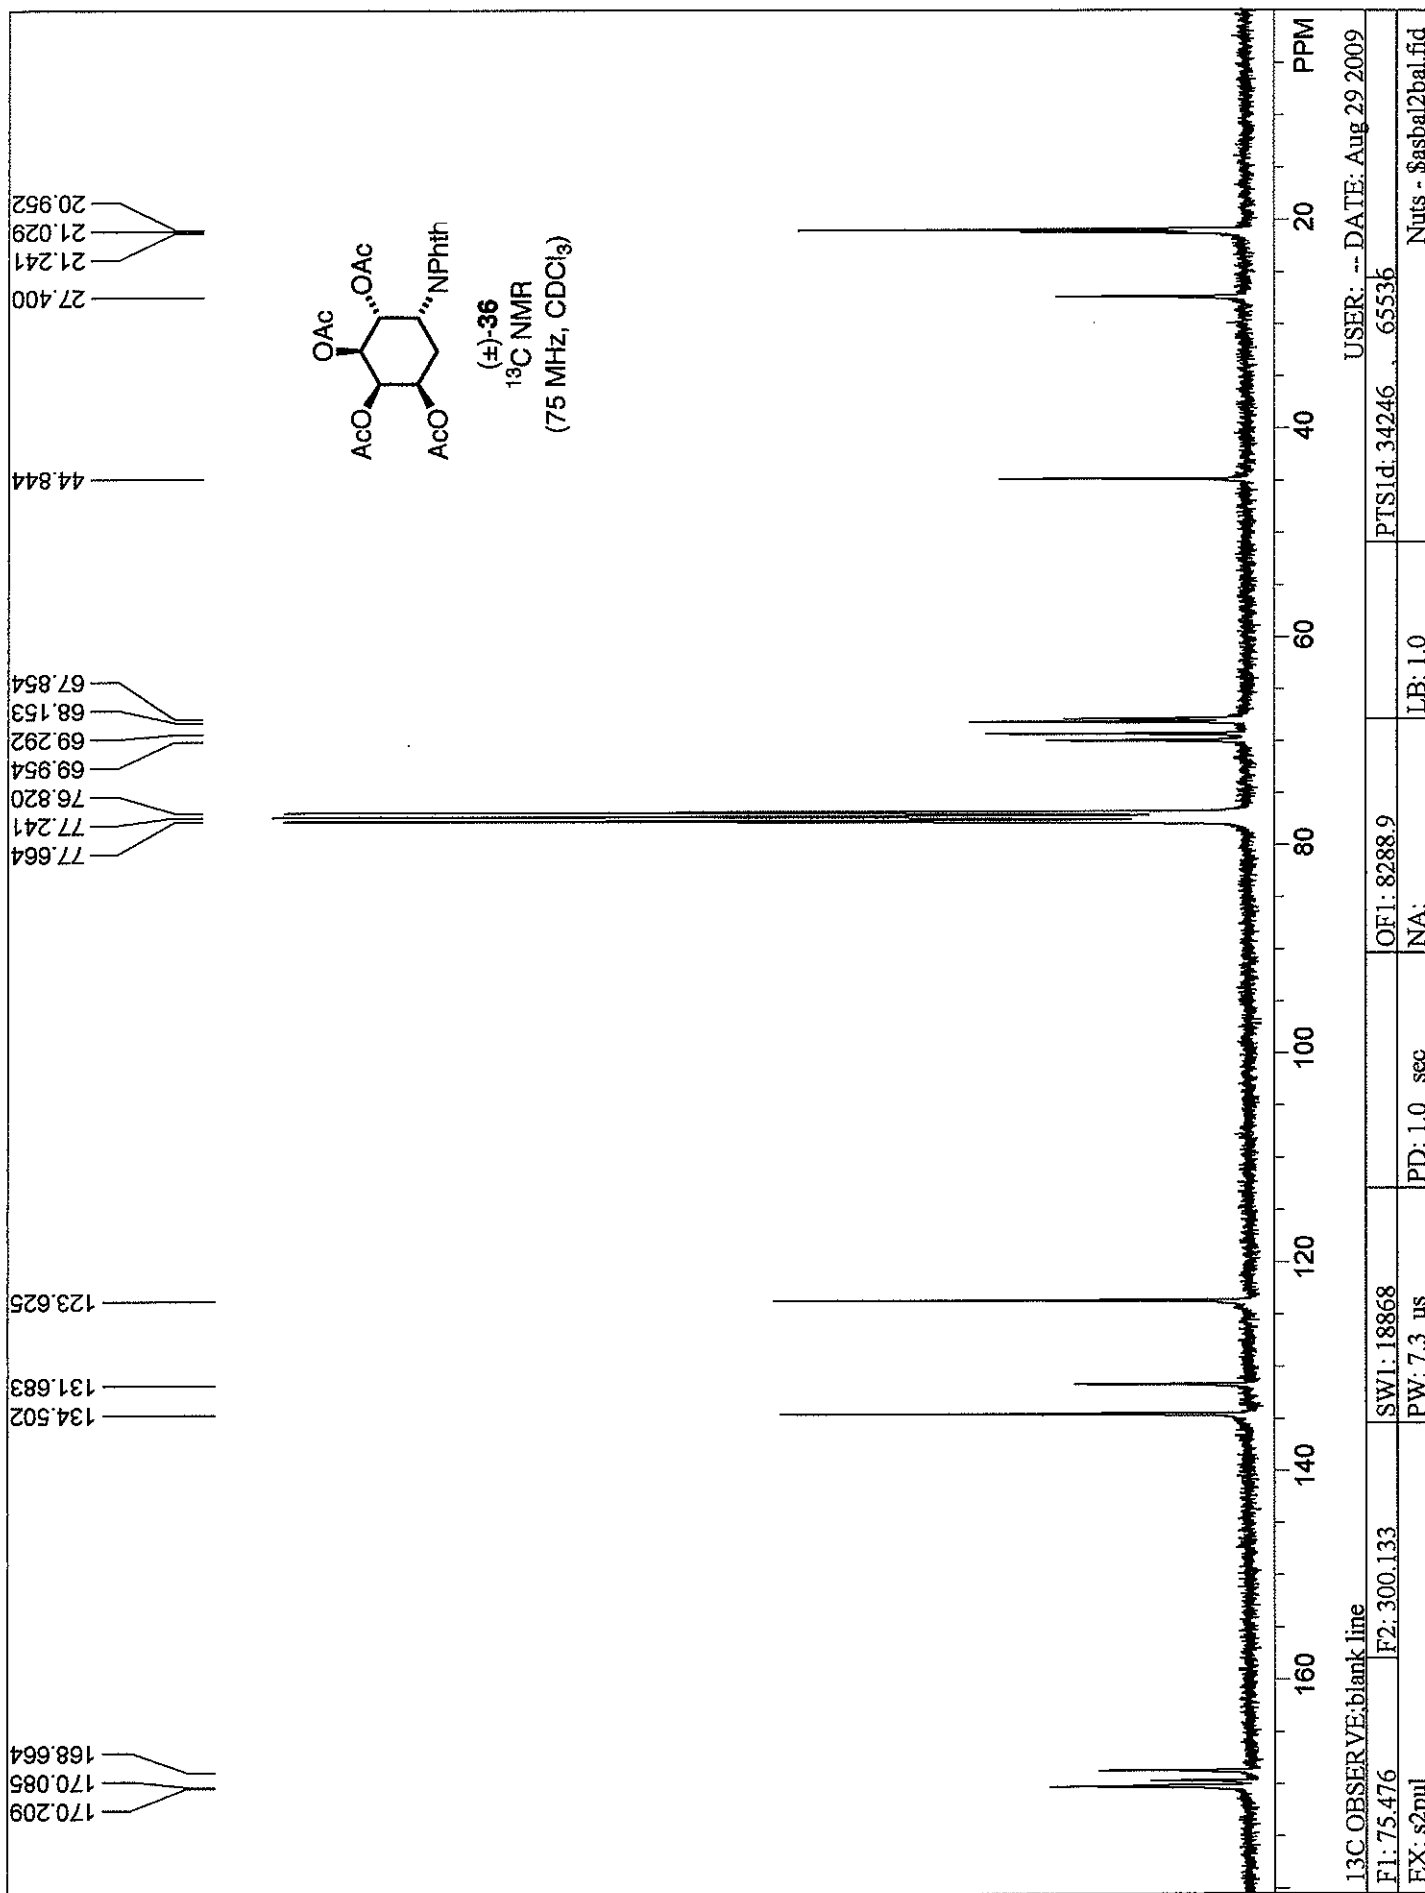

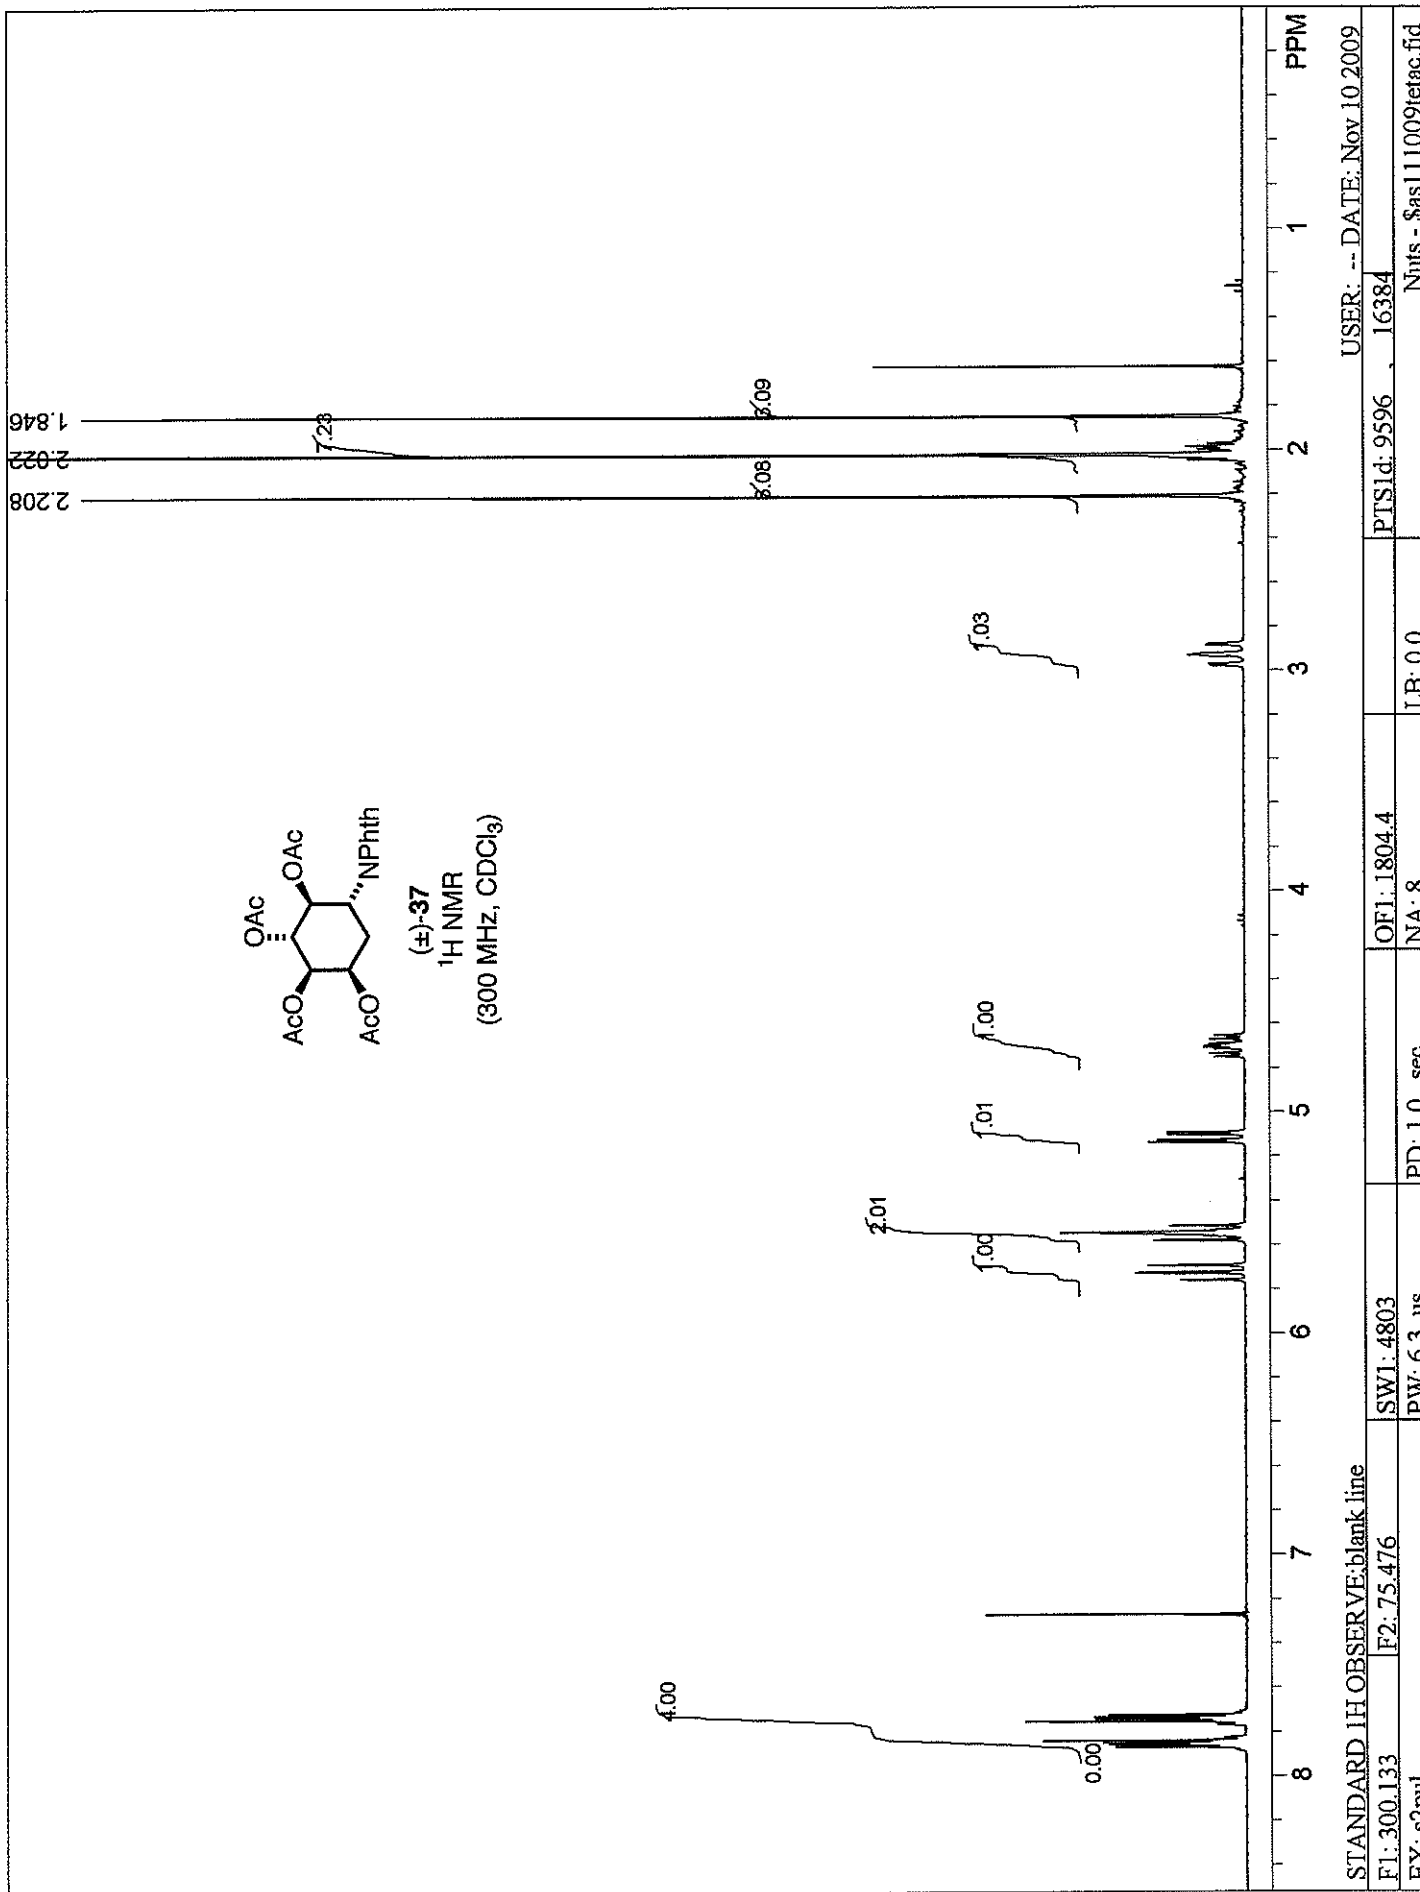

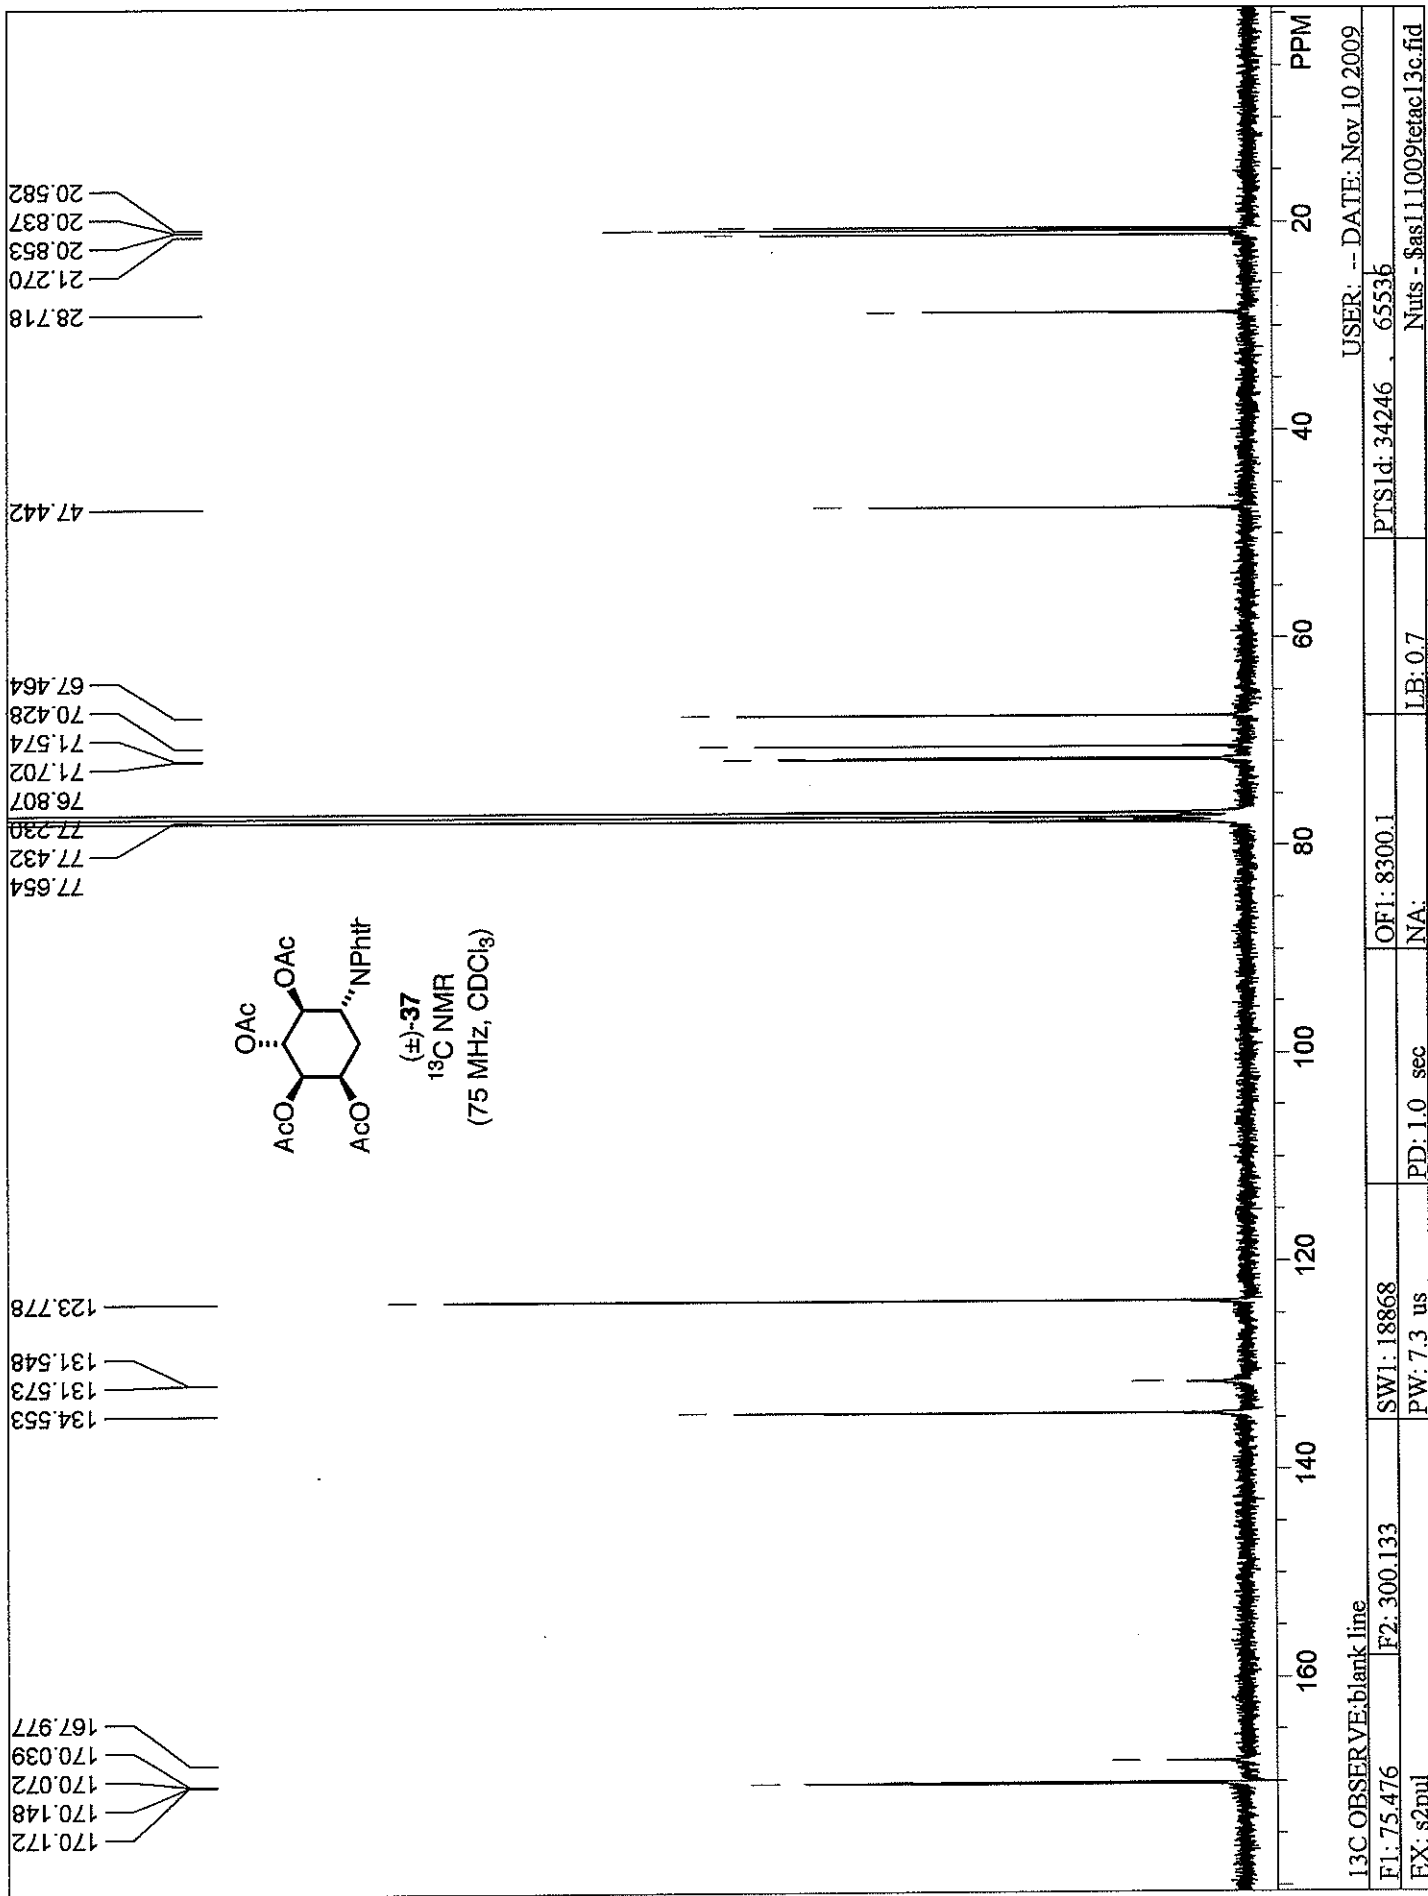

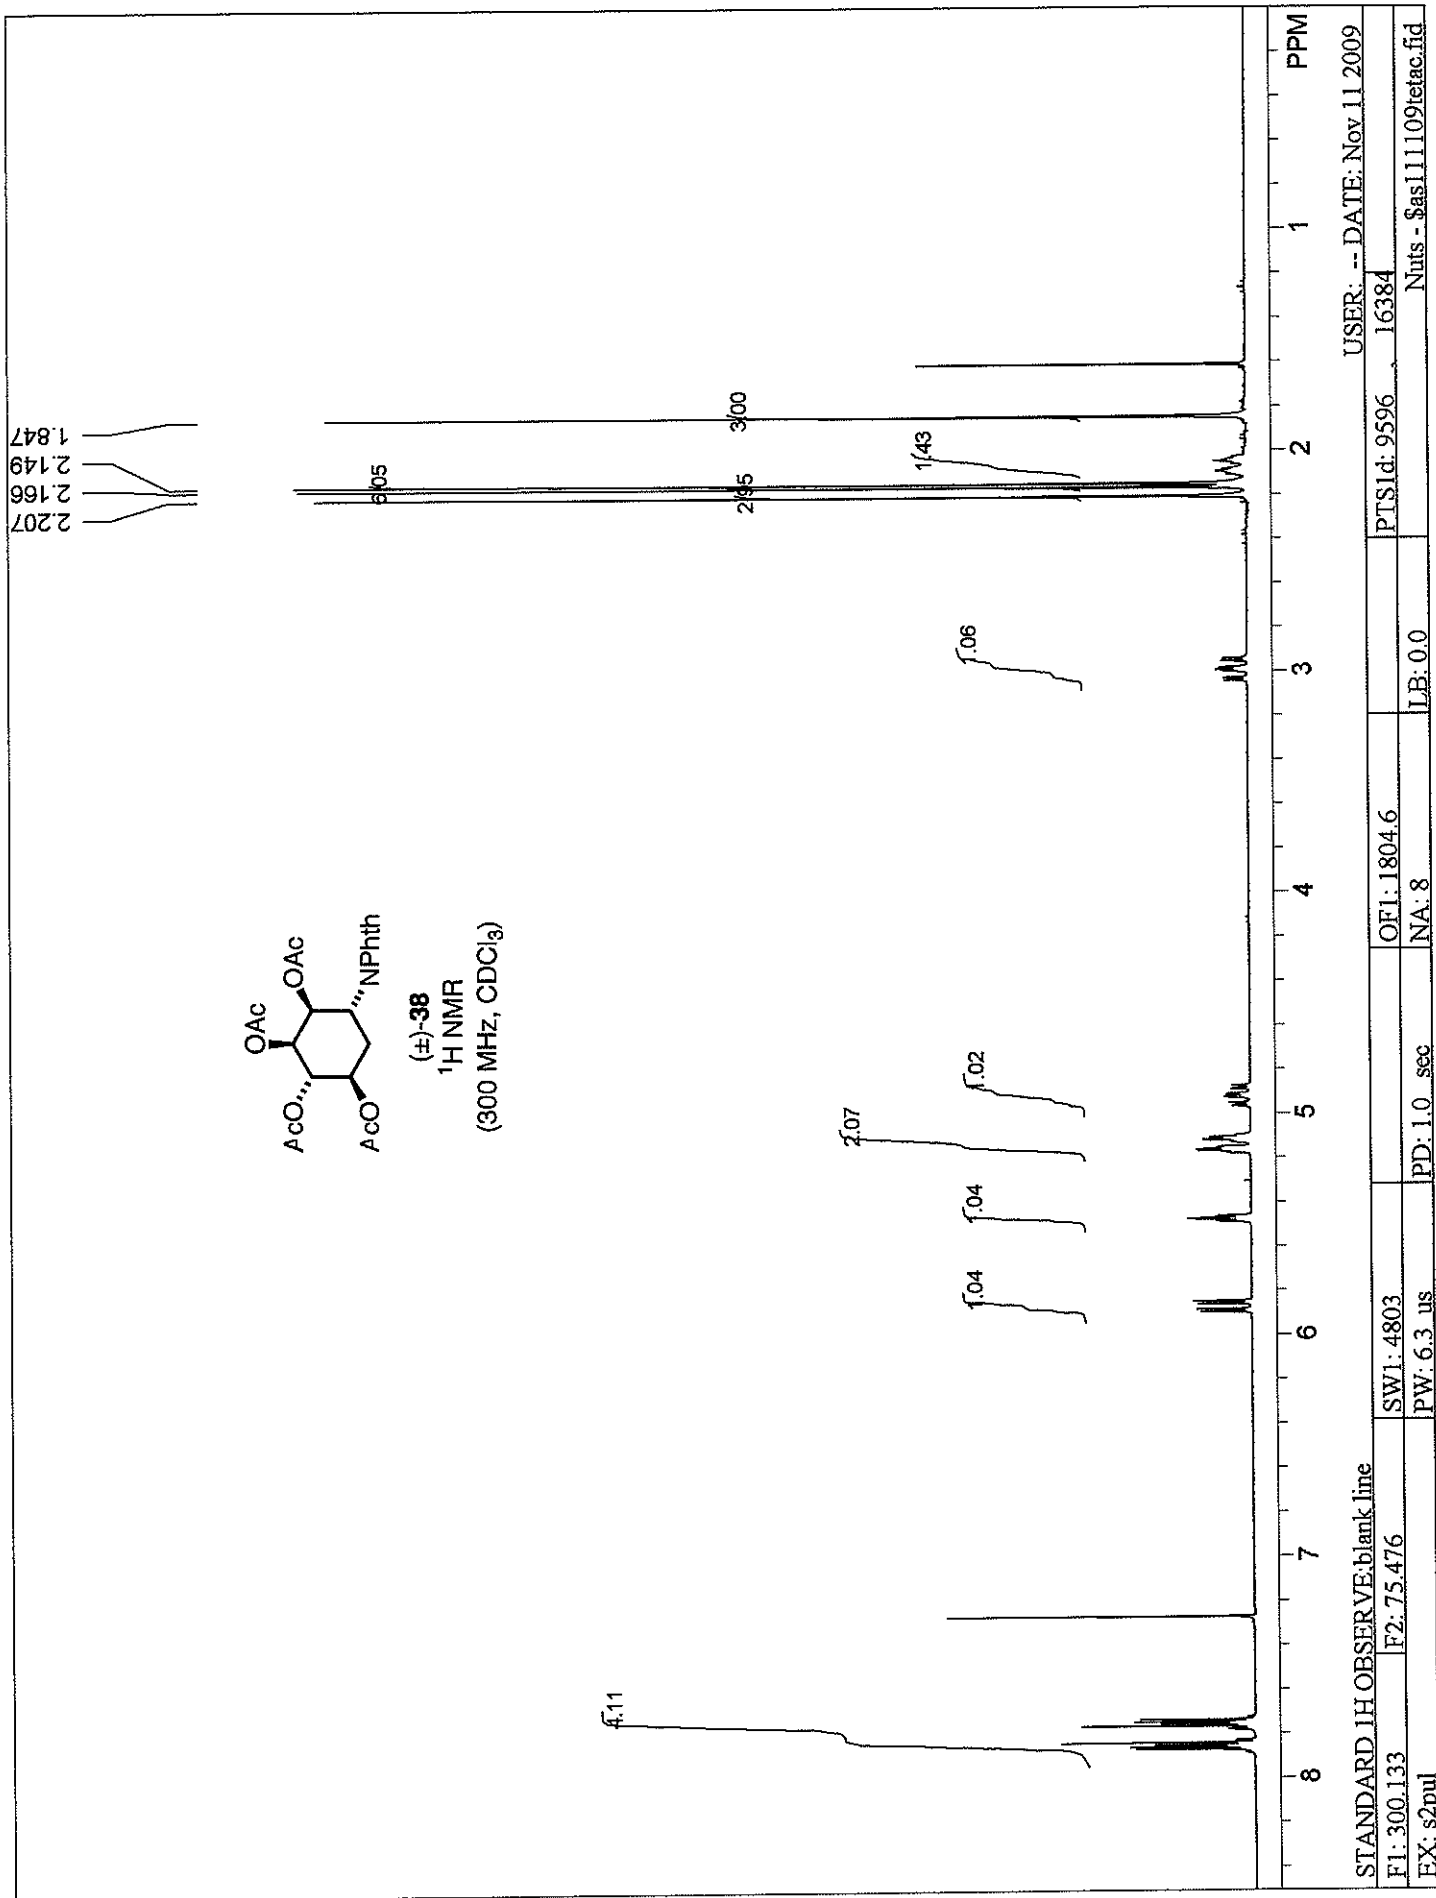

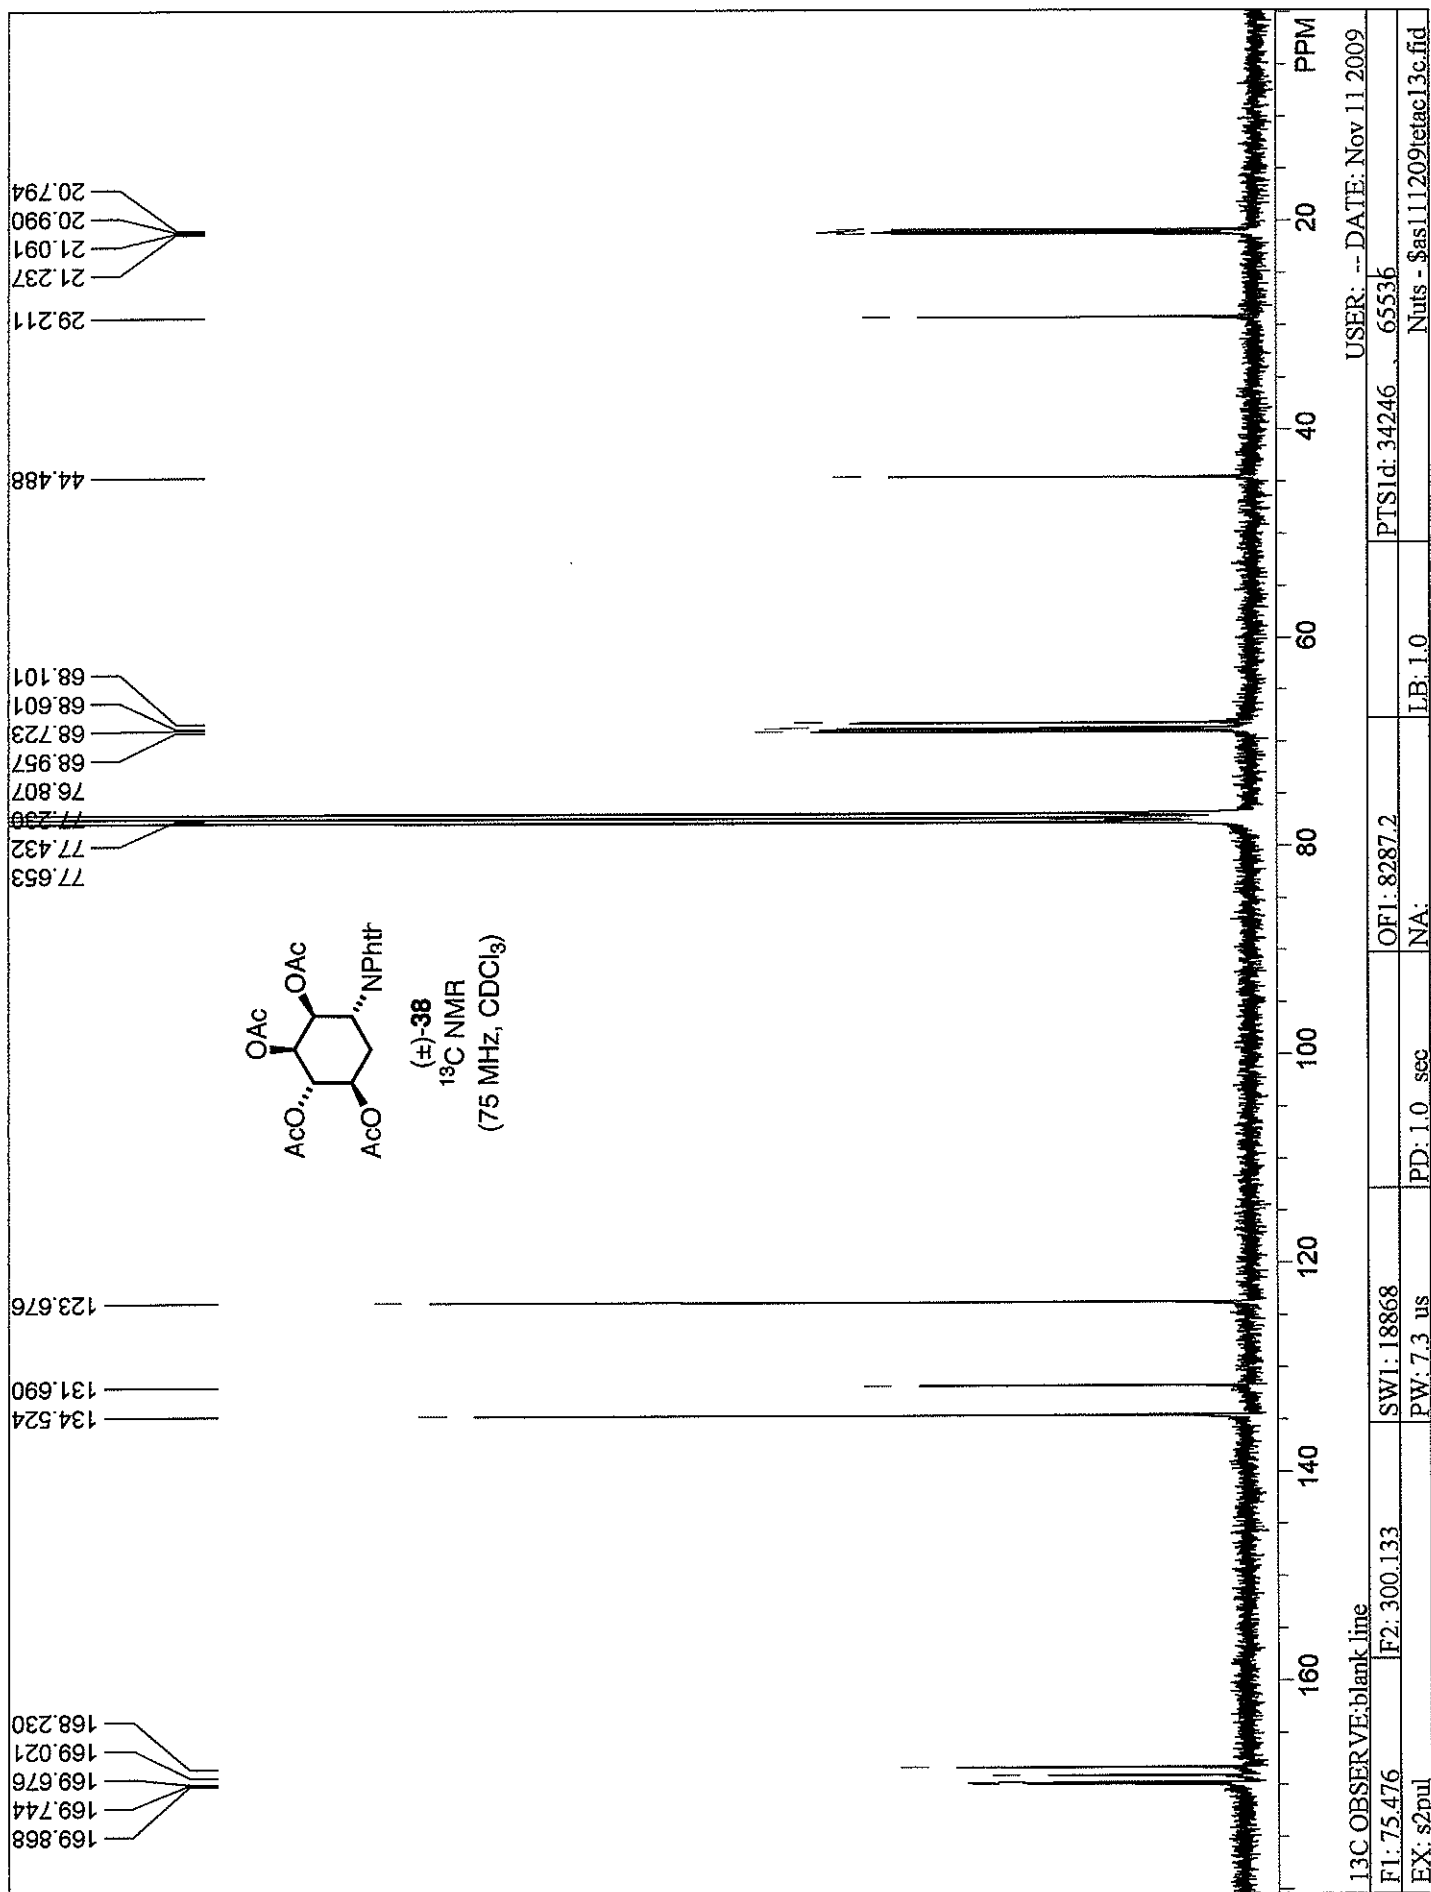



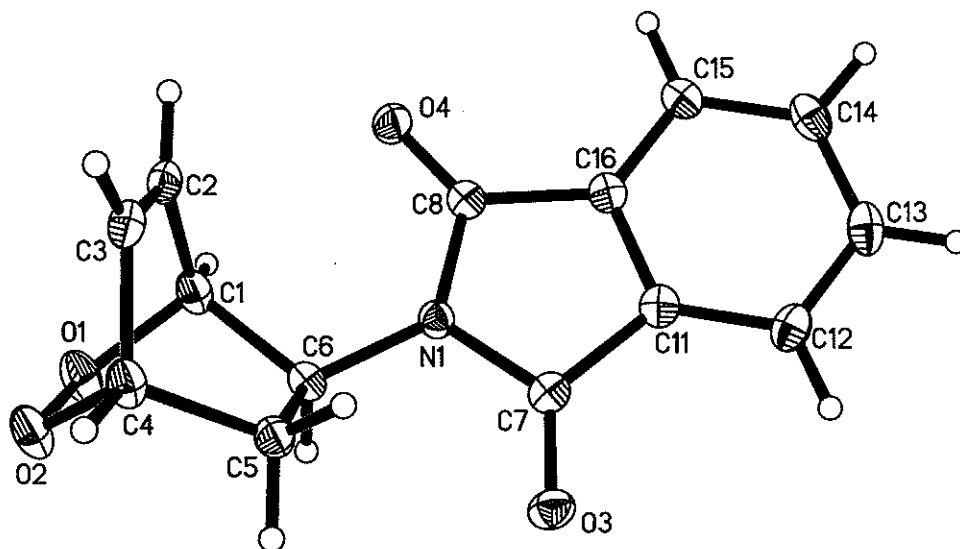

ORTEP of (±)-9

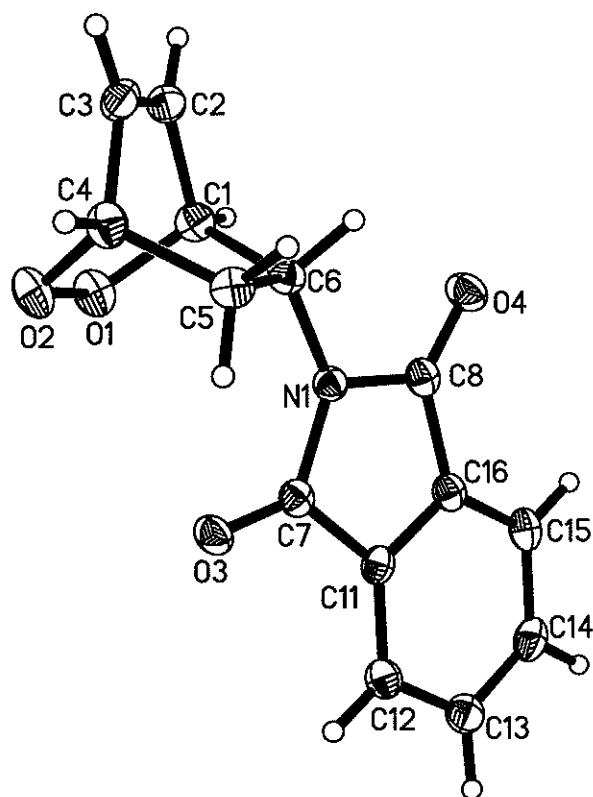

ORTEP of (±)-10

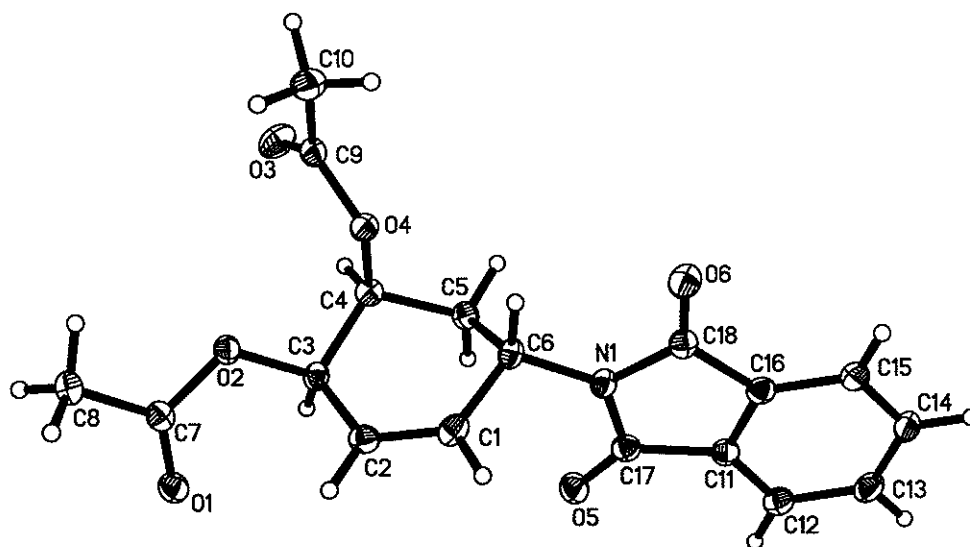

ORTEP of ( $\pm$ )-18

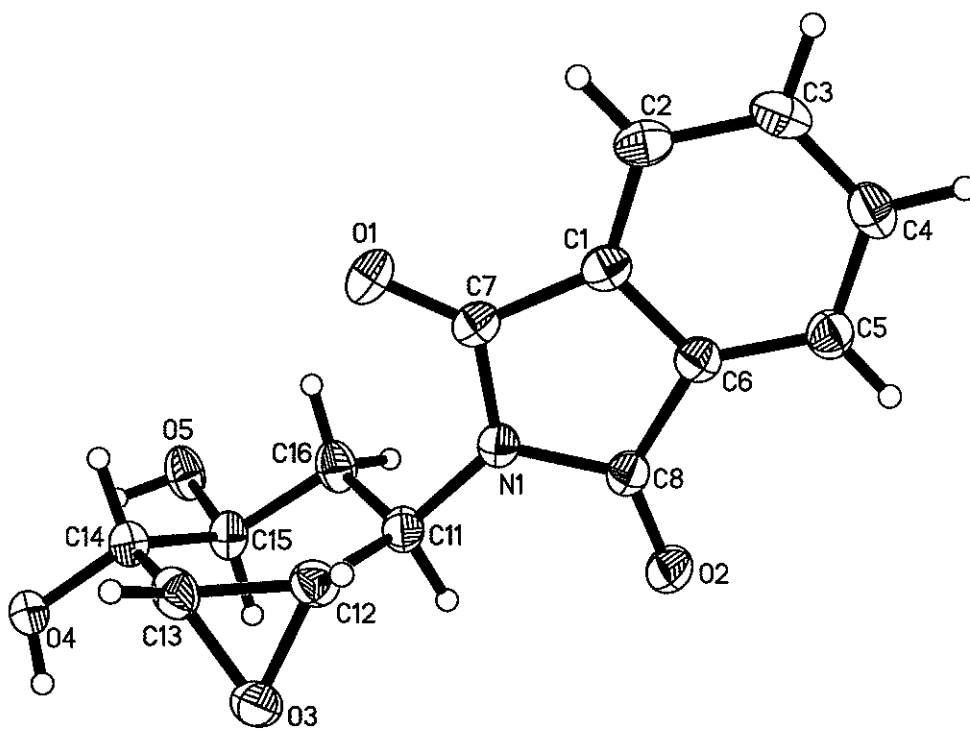

ORTEP of ( $\pm$ )-33

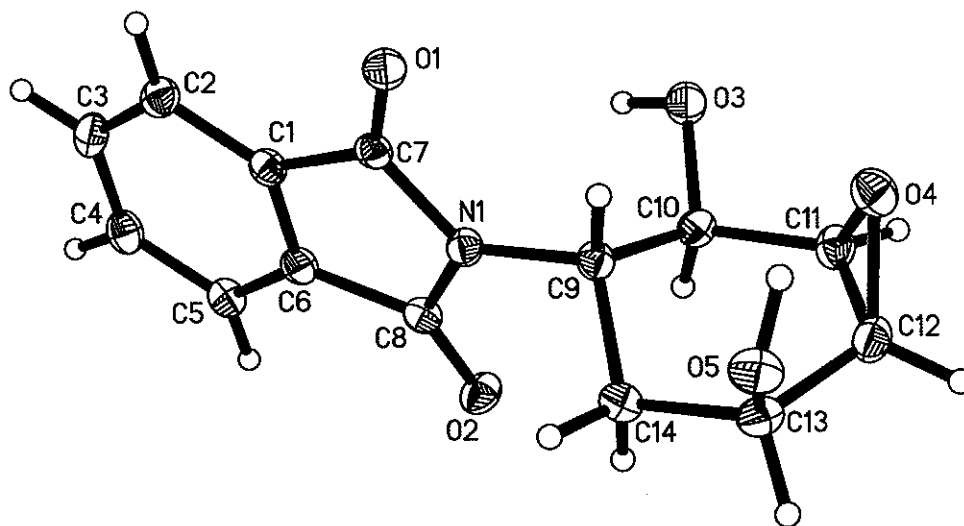

ORTEP of (±)-34

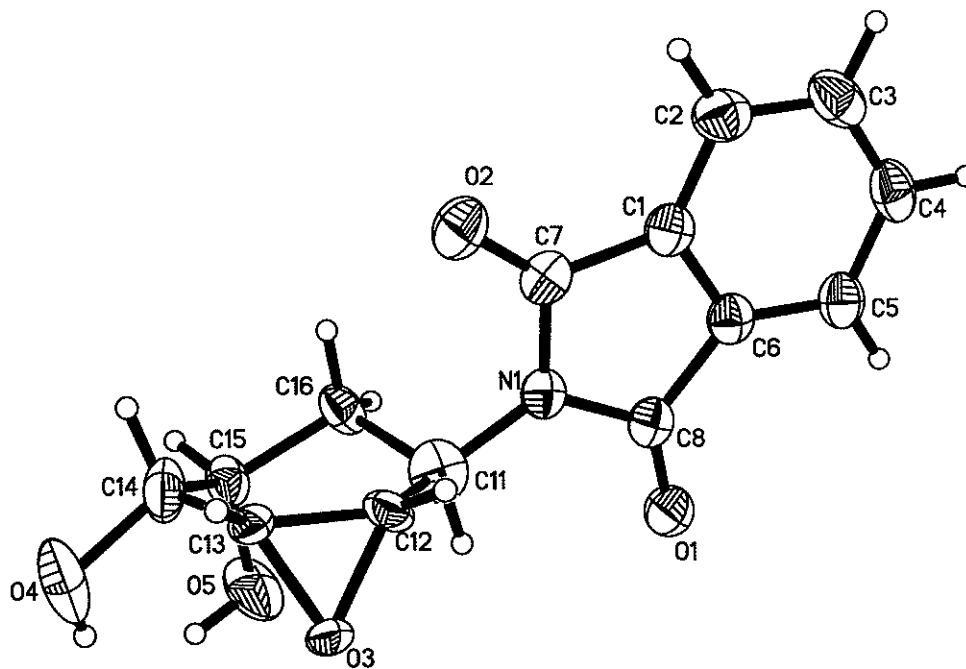

ORTEP of (±)-35
